# Supplementary material for: Autoimmune Effect of Antibodies against the SARS-CoV-2 Nucleoprotein
Source: Viruses. 2022 May 25;14(6):1141. doi: 10.3390/v14061141 (PMC9228376; doi:10.3390/v14061141)
Supplement: Supplementary file 1 [file viruses-14-01141-s001.zip]

Archive with 12 entries (12 files):
- Supplementary Materials.pdf
- __MACOSX/._Supplementary Materials.pdf
- Table S5.xlsx
- __MACOSX/._Table S5.xlsx
- Table S1.xlsx
- __MACOSX/._Table S1.xlsx
- Table S4.xlsx
- __MACOSX/._Table S4.xlsx
- Table S3.xlsx
- __MACOSX/._Table S3.xlsx
- Table S2.xlsx
- __MACOSX/._Table S2.xlsx
