# Supplementary material for: Autoimmune Effect of Antibodies against the SARS-CoV-2 Nucleoprotein
Source: Viruses. 2022 May 25;14(6):1141. doi: 10.3390/v14061141 (PMC9228376; doi:10.3390/v14061141)
Supplement: Supplementary file 1 [file viruses-14-01141-s001.zip › Table S1.xlsx]

## Sheet: Лист1
Table S1. Comparative data of ELISA to RBD Sars-Cov-2 using different assay kits
Number	Time point of collected serum	value_Abbott Core Laboratory, BAU/ml	value_ “The center of innovation of biotechnology Allele", CP
1	S3	1288.9	3.58
2	S7	509.35	2.88
3	S3	115.47	1.06
4	S2	91.5	2.59
5	S2	1077.8	7.34
6	S2	194.61	3.82
7	S7	320.49	2.59
8	S7	292.02	1.8
9	S1	1.95	0.25
10	S7	376.81	6.41
11	S7	2377.6	5.52
12	S7	2941.5	6.08
13	S7	5680	4.67
14	S2	114.82	4.69
15	S3	359.15	3.28
16	S3	4805.1	12.21
17	S7	676.94	3.72
18	S2	163.51	3.08
19	S3	432.59	2.1
20	S2	876.99	3.55
21	S2	118.8	1.44
22	S7	1370.5	7.89
23	S3	449.15	6.8
24	S7	431.89	7.23
25	S7	1934.2	6
26	S2	211.65	1.65
27	S2	4.64	0.24
28	S3	1386.6	8.56
29	S7	885.81	3.46
30	S1	723.42	3.66
31	S2	291.27	2.45
32	S1	0.44	0.19
33	serum from control group	0.04	0.18
34		0.2	0.25
35		0.03	0.17
36		0.03	0.19
37		0.03	0.18
		reference values
		“The SARS-CoV-2 IgG II Quant assay” (Abbott Core Laboratory)	<50 - negative
			≥50 - positive
		«SARS-CoV-2-IgG-ELISA» (kits supplied by “The center of innovation of biotechnology Allele")	<0.9 - negative
			0.9-1.1 - equivocal
			≥1.1 - positive
