# Supplementary material for: Autoimmune Effect of Antibodies against the SARS-CoV-2 Nucleoprotein
Source: Viruses. 2022 May 25;14(6):1141. doi: 10.3390/v14061141 (PMC9228376; doi:10.3390/v14061141)
Supplement: Supplementary file 1 [file viruses-14-01141-s001.zip › Table S2.xlsx]

## Sheet: Nucleoprotein
Table S2. Comparative analysis of the amino acid sequences of N Sars-Cov-2 protein with cell lines A549, T84 proteins, and also separately considered proteins that were identified by mass spectrometry (labeled as target). For cell lines, the intersection area was chosen 6 amino acids, for target proteins – 4.
A549 amino acid overlap length=6
start	end	sequence	lenseq	name
31	37	RSGARS	6	sp|P24752|THIL_HUMAN
96	102	GDGKMK	6	sp|Q9Y2W1|TR150_HUMAN
115	121	GPEAGL	6	sp|P02792|FRIL_HUMAN
174	180	GSRGGS	6	sp|P35908|K22E_HUMAN
182	188	SSRSSS	6	sp|Q9Y2W1|TR150_HUMAN
182	188	SSRSSS	6	sp|Q86YZ3|HORN_HUMAN
183	189	SRSSSR	6	sp|Q13247|SRSF6_HUMAN
183	189	SRSSSR	6	sp|Q86YZ3|HORN_HUMAN
215	221	DAALAL	6	sp|Q13011|ECH1_HUMAN
216	222	AALALL	6	sp|O15173|PGRC2_HUMAN
216	222	AALALL	6	sp|P14209|CD99_HUMAN
216	222	AALALL	6	sp|A8MVW0|F1712_HUMAN
217	223	ALALLL	6	sp|P51571|SSRD_HUMAN
217	223	ALALLL	6	sp|P14209|CD99_HUMAN
218	224	LALLLL	6	sp|P51571|SSRD_HUMAN
218	224	LALLLL	6	sp|P49755|TMEDA_HUMAN
286	292	GDQELI	6	sp|Q92736|RYR2_HUMAN
331	337	TYTGAI	6	sp|Q969X5|ERGI1_HUMAN
369	375	KDKKKK	6	sp|P08238|HS90B_HUMAN
369	375	KDKKKK	6	sp|Q08211|DHX9_HUMAN
369	375	KDKKKK	6	sp|P62191|PRS4_HUMAN
369	375	KDKKKK	6	sp|Q9P2E9|RRBP1_HUMAN
T84 amino acid overlap length=6
start	end	sequence	lenseq	name
20	26	SDSTGS	6	sp|Q96TC7|RMD3_HUMAN
182	188	SSRSSS	6	sp|Q9UHW9|S12A6_HUMAN
183	189	SRSSSR	6	sp|Q9UHW9|S12A6_HUMAN
185	191	SSSRSR	6	sp|Q9BVN2|RUSC1_HUMAN
216	222	AALALL	6	sp|O14657|TOR1B_HUMAN
217	223	ALALLL	6	sp|O14657|TOR1B_HUMAN
218	224	LALLLL	6	sp|Q08174|PCDH1_HUMAN
370	376	DKKKKA	6	sp|Q9BYX4|IFIH1_HUMAN
374	380	KADETQ	6	sp|Q16706|MA2A1_HUMAN
Target proteins (MS data) amino acid overlaplength=4
start	end	sequence	lenseq	name
16	20	FGGP	4	sp|P08670|VIME_HUMAN
59	63	GKED	4	sp|P68363|TBA1B_HUMAN
59	63	GKED	4	sp|Q71U36|TBA1A_HUMAN
59	63	GKED	4	sp|P68366|TBA4A_HUMAN
59	63	GKED	4	sp|Q9BQE3|TBA1C_HUMAN
59	63	GKED	4	sp|P0DPH7|TBA3C_HUMAN
59	63	GKED	4	sp|P0DPH8|TBA3D_HUMAN
78	82	SPDD	4	sp|P06733|ENOA_HUMAN
90	94	TRRI	4	sp|P05783|K1C18_HUMAN
136	140	GALN	4	sp|P68363|TBA1B_HUMAN
136	140	GALN	4	sp|Q71U36|TBA1A_HUMAN
136	140	GALN	4	sp|P68366|TBA4A_HUMAN
136	140	GALN	4	sp|Q9BQE3|TBA1C_HUMAN
136	140	GALN	4	sp|P0DPH7|TBA3C_HUMAN
136	140	GALN	4	sp|P0DPH8|TBA3D_HUMAN
153	157	NAAI	4	sp|P68363|TBA1B_HUMAN
153	157	NAAI	4	sp|Q71U36|TBA1A_HUMAN
153	157	NAAI	4	sp|P68366|TBA4A_HUMAN
153	157	NAAI	4	sp|Q9BQE3|TBA1C_HUMAN
153	157	NAAI	4	sp|P0DPH7|TBA3C_HUMAN
153	157	NAAI	4	sp|P0DPH8|TBA3D_HUMAN
154	158	AAIV	4	sp|P68104|EF1A1_HUMAN
156	160	IVLQ	4	sp|P05783|K1C18_HUMAN
163	167	GTTL	4	sp|P68104|EF1A1_HUMAN
182	186	SSRS	4	sp|P08670|VIME_HUMAN
182	186	SSRS	4	sp|P05787|K2C8_HUMAN
185	189	SSSR	4	sp|P08670|VIME_HUMAN
185	189	SSSR	4	sp|P05787|K2C8_HUMAN
186	190	SSRS	4	sp|P08670|VIME_HUMAN
186	190	SSRS	4	sp|P05787|K2C8_HUMAN
214	218	GDAA	4	sp|P68104|EF1A1_HUMAN
229	233	LESK	4	sp|P05783|K1C18_HUMAN
232	236	KMSG	4	sp|P00352|AL1A1_HUMAN
319	323	IGME	4	sp|P68032|ACTC_HUMAN
319	323	IGME	4	sp|P68133|ACTS_HUMAN
319	323	IGME	4	sp|P63267|ACTH_HUMAN
319	323	IGME	4	sp|P62736|ACTA_HUMAN
397	401	ADLD	4	sp|P00352|AL1A1_HUMAN
