# Supplementary material for: Autoimmune Effect of Antibodies against the SARS-CoV-2 Nucleoprotein
Source: Viruses. 2022 May 25;14(6):1141. doi: 10.3390/v14061141 (PMC9228376; doi:10.3390/v14061141)
Supplement: Supplementary file 1 [file viruses-14-01141-s001.zip › Table S3.xlsx]

## Sheet: Spike
Table S3. Comparative analysis of the amino acid sequences of Spike Sars-Cov-2 protein with cell lines A549, T84 proteins, and also separately considered proteins that were identified by mass spectrometry (labeled as target). For cell lines, the intersection area was chosen 6 amino acids, for target proteins – 4.
A549 amino acid overlap length=6
start	end	sequence	lenseq	name
2	8	VFLVLL	6	sp|P02788|TRFL_HUMAN
6	12	LLPLVS	6	sp|P11216|PYGB_HUMAN
282	288	GTITDA	6	sp|P50995|ANX11_HUMAN
412	418	GQTGKI	6	sp|P13804|ETFA_HUMAN
506	512	PYRVVV	6	sp|P21333|FLNA_HUMAN
679	685	SPRRAR	6	sp|Q96JM2|ZN462_HUMAN
790	796	TPPIKD	6	sp|O75533|SF3B1_HUMAN
913	919	NVLYEN	6	sp|Q14204|DYHC1_HUMAN
938	944	SSTASA	6	sp|P62277|RS13_HUMAN
939	945	STASAL	6	sp|P62277|RS13_HUMAN
1149	1155	EELDKY	6	sp|P05783|K1C18_HUMAN
1181	1187	EIDRLN	6	sp|Q01105|SET_HUMAN
1182	1188	IDRLNE	6	sp|Q01105|SET_HUMAN
1199	1205	LQELGK	6	sp|O94925|GLSK_HUMAN
1258	1264	DDSEPV	6	sp|Q13283|G3BP1_HUMAN
1258	1264	DDSEPV	6	sp|Q9UN86|G3BP2_HUMAN
T84 amino acid overlap length=6
start	end	sequence	lenseq	name
39	45	DKVFRS	6	sp|Q0VGE8|ZN816_HUMAN
40	46	KVFRSS	6	sp|Q9BXS9|S26A6_HUMAN
44	50	SSVLHS	6	sp|Q6ZV73|FGD6_HUMAN
186	192	KNLREF	6	sp|Q13753|LAMC2_HUMAN
241	247	LALHRS	6	sp|Q53GL7|PAR10_HUMAN
251	257	GDSSSG	6	sp|Q9H2V7|SPNS1_HUMAN
251	257	GDSSSG	6	sp|O95049|ZO3_HUMAN
259	265	AGAAAY	6	sp|Q8IXQ6|PARP9_HUMAN
412	418	GQTGKI	6	sp|Q8WTV0|SCRB1_HUMAN
508	514	RVVVLS	6	sp|Q9BYK8|HELZ2_HUMAN
576	582	RDPQTL	6	sp|Q8NFW9|MYRIP_HUMAN
718	724	TISVTT	6	sp|Q2M2H8|MGAL_HUMAN
909	915	GVTQNV	6	sp|Q9HCM1|RESF1_HUMAN
934	940	QDSLSS	6	sp|P01024|CO3_HUMAN
934	940	QDSLSS	6	sp|P37268|FDFT_HUMAN
961	967	LVKQLS	6	sp|Q99618|CDCA3_HUMAN
983	989	LDKVEA	6	sp|P15924|DESP_HUMAN
997	1003	TGRLQS	6	sp|Q8IVL0|NAV3_HUMAN
998	1004	GRLQSL	6	sp|Q8IVL0|NAV3_HUMAN
1013	1019	RAAEIR	6	sp|P48449|LSS_HUMAN
1149	1155	EELDKY	6	sp|P05783|K1C18_HUMAN
1199	1205	LQELGK	6	sp|O94925|GLSK_HUMAN
Target proteins (MS data) length=4
start	end	sequence	lenseq	name
7	11	LPLV	4	sp|P08670|VIME_HUMAN
43	47	RSSV	4	sp|P08670|VIME_HUMAN
58	62	FSNV	4	sp|P00352|AL1A1_HUMAN
59	63	SNVT	4	sp|P00352|AL1A1_HUMAN
106	110	GTTL	4	sp|P68104|EF1A1_HUMAN
114	118	QSLL	4	sp|P05787|K2C8_HUMAN
122	126	ATNV	4	sp|P06733|ENOA_HUMAN
187	191	NLRE	4	sp|P08670|VIME_HUMAN
199	203	YFKI	4	sp|P05783|K1C18_HUMAN
224	228	PLVD	4	sp|P08670|VIME_HUMAN
233	237	NITR	4	sp|P05783|K1C18_HUMAN
248	252	LTPG	4	sp|P00352|AL1A1_HUMAN
253	257	SSSG	4	sp|P00352|AL1A1_HUMAN
258	262	TAGA	4	sp|P00352|AL1A1_HUMAN
259	263	AGAA	4	sp|P00352|AL1A1_HUMAN
307	311	VEKG	4	sp|P06733|ENOA_HUMAN
315	319	SNFR	4	sp|P05787|K2C8_HUMAN
319	323	VQPT	4	sp|P00352|AL1A1_HUMAN
335	339	CPFG	4	sp|P00352|AL1A1_HUMAN
347	351	ASVY	4	sp|P05783|K1C18_HUMAN
348	352	SVYA	4	sp|P05783|K1C18_HUMAN
378	382	CYGV	4	sp|P00352|AL1A1_HUMAN
386	390	LNDL	4	sp|P00352|AL1A1_HUMAN
404	408	DEVR	4	sp|P68363|TBA1B_HUMAN
404	408	DEVR	4	sp|Q71U36|TBA1A_HUMAN
404	408	DEVR	4	sp|Q9BQE3|TBA1C_HUMAN
404	408	DEVR	4	sp|P0DPH7|TBA3C_HUMAN
404	408	DEVR	4	sp|P0DPH8|TBA3D_HUMAN
439	443	NLDS	4	sp|P08670|VIME_HUMAN
457	461	KSNL	4	sp|P00352|AL1A1_HUMAN
458	462	SNLK	4	sp|P00352|AL1A1_HUMAN
510	514	VVLS	4	sp|P05787|K2C8_HUMAN
530	534	TNLV	4	sp|P68363|TBA1B_HUMAN
530	534	TNLV	4	sp|Q71U36|TBA1A_HUMAN
530	534	TNLV	4	sp|P68366|TBA4A_HUMAN
530	534	TNLV	4	sp|Q9BQE3|TBA1C_HUMAN
530	534	TNLV	4	sp|P0DPH7|TBA3C_HUMAN
530	534	TNLV	4	sp|P0DPH8|TBA3D_HUMAN
548	552	TGVL	4	sp|P68104|EF1A1_HUMAN
574	578	AVRD	4	sp|P68104|EF1A1_HUMAN
590	594	SFGG	4	sp|P68363|TBA1B_HUMAN
590	594	SFGG	4	sp|Q71U36|TBA1A_HUMAN
590	594	SFGG	4	sp|P68366|TBA4A_HUMAN
590	594	SFGG	4	sp|Q9BQE3|TBA1C_HUMAN
590	594	SFGG	4	sp|P0DPH7|TBA3C_HUMAN
590	594	SFGG	4	sp|P0DPH8|TBA3D_HUMAN
626	630	DQLT	4	sp|P08670|VIME_HUMAN
643	647	QTRA	4	sp|P05783|K1C18_HUMAN
650	654	IGAE	4	sp|P06733|ENOA_HUMAN
690	694	SIIA	4	sp|P05787|K2C8_HUMAN
721	725	VTTE	4	sp|P68104|EF1A1_HUMAN
725	729	ILPV	4	sp|P06733|ENOA_HUMAN
744	748	DSTE	4	sp|P68104|EF1A1_HUMAN
767	771	TGIA	4	sp|P05783|K1C18_HUMAN
796	800	FGGF	4	sp|P00352|AL1A1_HUMAN
817	821	IEDL	4	sp|P05783|K1C18_HUMAN
827	831	LADA	4	sp|P08670|VIME_HUMAN
827	831	LADA	4	sp|P00352|AL1A1_HUMAN
842	846	DIAA	4	sp|P60709|ACTB_HUMAN
856	860	GLTV	4	sp|P05783|K1C18_HUMAN
863	867	LLTD	4	sp|P00352|AL1A1_HUMAN
864	868	LTDE	4	sp|P05787|K2C8_HUMAN
865	869	TDEM	4	sp|P00352|AL1A1_HUMAN
875	879	ALLA	4	sp|P68104|EF1A1_HUMAN
889	893	AGAA	4	sp|P00352|AL1A1_HUMAN
891	895	AALQ	4	sp|P05787|K2C8_HUMAN
909	913	GVTQ	4	sp|P00352|AL1A1_HUMAN
929	933	AIGK	4	sp|P06733|ENOA_HUMAN
940	944	TASA	4	sp|P06733|ENOA_HUMAN
947	951	LQDV	4	sp|P68104|EF1A1_HUMAN
962	966	VKQL	4	sp|P68104|EF1A1_HUMAN
966	970	SSNF	4	sp|P05787|K2C8_HUMAN
971	975	AISS	4	sp|P00352|AL1A1_HUMAN
986	990	VEAE	4	sp|P0DPH7|TBA3C_HUMAN
986	990	VEAE	4	sp|P0DPH8|TBA3D_HUMAN
990	994	VQID	4	sp|P08670|VIME_HUMAN
995	999	LITG	4	sp|P68363|TBA1B_HUMAN
995	999	LITG	4	sp|Q71U36|TBA1A_HUMAN
995	999	LITG	4	sp|P68366|TBA4A_HUMAN
995	999	LITG	4	sp|Q9BQE3|TBA1C_HUMAN
995	999	LITG	4	sp|P0DPH7|TBA3C_HUMAN
995	999	LITG	4	sp|P0DPH8|TBA3D_HUMAN
998	1002	GRLQ	4	sp|P08670|VIME_HUMAN
1000	1004	LQSL	4	sp|P05787|K2C8_HUMAN
1035	1039	QSKR	4	sp|P60709|ACTB_HUMAN
1035	1039	QSKR	4	sp|P63261|ACTG_HUMAN
1035	1039	QSKR	4	sp|P68032|ACTC_HUMAN
1035	1039	QSKR	4	sp|P68133|ACTS_HUMAN
1035	1039	QSKR	4	sp|P63267|ACTH_HUMAN
1035	1039	QSKR	4	sp|P62736|ACTA_HUMAN
1127	1131	VVIG	4	sp|P68104|EF1A1_HUMAN
1127	1131	VVIG	4	sp|P06733|ENOA_HUMAN
1148	1152	KEEL	4	sp|P05783|K1C18_HUMAN
1149	1153	EELD	4	sp|P05783|K1C18_HUMAN
1150	1154	ELDK	4	sp|P05783|K1C18_HUMAN
1151	1155	LDKY	4	sp|P05783|K1C18_HUMAN
1175	1179	VVNI	4	sp|P00352|AL1A1_HUMAN
1179	1183	QKEI	4	sp|P60709|ACTB_HUMAN
1179	1183	QKEI	4	sp|P63261|ACTG_HUMAN
1179	1183	QKEI	4	sp|P68032|ACTC_HUMAN
1179	1183	QKEI	4	sp|P68133|ACTS_HUMAN
1179	1183	QKEI	4	sp|P63267|ACTH_HUMAN
1179	1183	QKEI	4	sp|P62736|ACTA_HUMAN
1189	1193	AKNL	4	sp|P08670|VIME_HUMAN
1193	1197	NESL	4	sp|P08670|VIME_HUMAN
1199	1203	LQEL	4	sp|P08670|VIME_HUMAN
