# Supplementary material for: Autoimmune Effect of Antibodies against the SARS-CoV-2 Nucleoprotein
Source: Viruses. 2022 May 25;14(6):1141. doi: 10.3390/v14061141 (PMC9228376; doi:10.3390/v14061141)
Supplement: Supplementary file 1 [file viruses-14-01141-s001.zip › Table S4.xlsx]

## Sheet: HLA I
Table S4. Data of bioinformatic analysis of N and S viral proteins for possible presentation of their peptides in HLA I and II classes.
Peptide sequence - amino acide sequence of the predicted peptide binding HLA
Protein ID - unique ID for the protein that is the precursor of the detected peptide
Peptide start position - number of the first peptide amino acid in the sequence of the precursor protein
HLA class I allele - unique ID for HLA class I allele
EL score - the predition score based on artificial neural networks, trained on an extensive dataset of Eluted Ligand (EL) mass spectrometry measurements, covering the three human HLA class I isotypes HLA-A, HLA-B and HLA-C
EL Rank - rank evaluated based on EL score
Binding level - predicted binding level based on EL Rank: we chose the threshold for strong and weak binders — 0.5% and 2% Rank, respectively
Peptide sequence	Protein ID	Peptide start position	HLA class I allele	EL score	EL Rank	Binding level
SSPDDQIGYY	N_protein_77-87	11	HLA-A01:01	0.973	0.0141	Strong binder	most significant results
WTAGAAAYY	surface_glycopr	14	HLA-A26:01	0.8427	0.0246	Strong binder			amino acid sequence similarity with human protein alpha-enolase (sp|P06733|ENOA_HUMAN)
NSSPDDQIGYY	N_protein_77-87	10	HLA-A01:01	0.945	0.0333	Strong binder			amino acid sequence similarity with human protein Elongation factor 1-alpha 1 (sp|P68104|EF1A1_HUMAN)
NTNSSPDDQIGYY	N_protein_77-87	8	HLA-A01:01	0.9066	0.0503	Strong binder			amino acid sequence similarity with human protein Keratin, type II cytoskeletal 8 (sp|P05787|K2C8_HUMAN)
SPRRARSVA	surface_glycopr	8	HLA-B07:02	0.9188	0.0577	Strong binder
SVASQSIIAY	surface_glycopr	14	HLA-A26:01	0.7109	0.072	Strong binder
WTAGAAAYY	surface_glycopr	14	HLA-A01:01	0.8139	0.0913	Strong binder
LQLPQGTTL	N_protein_158-1	11	HLA-B39:01	0.6771	0.1119	Strong binder
VASQSIIAY	surface_glycopr	15	HLA-B15:01	0.7989	0.1156	Strong binder
LQLPQGTTL	N_protein_158-1	11	HLA-B15:01	0.7945	0.1193	Strong binder
SSPDDQIGY	N_protein_77-87	11	HLA-A01:01	0.672	0.168	Strong binder
NSSPDDQIGY	N_protein_77-87	10	HLA-A01:01	0.6521	0.1791	Strong binder
KLNDLCFTNVY	surface_glycopr	10	HLA-B15:01	0.7215	0.1833	Strong binder
SVASQSIIAY	surface_glycopr	14	HLA-B15:01	0.7185	0.1869	Strong binder
SPDDQIGYY	N_protein_77-87	12	HLA-A01:01	0.6261	0.1999	Strong binder
SPRRARSV	surface_glycopr	8	HLA-B07:02	0.7241	0.2012	Strong binder
SQSIIAYTM	surface_glycopr	17	HLA-B39:01	0.4833	0.2371	Strong binder
SSPDDQIGY	N_protein_77-87	11	HLA-A26:01	0.4001	0.2404	Strong binder
KCYGVSPTK	surface_glycopr	2	HLA-A03:01	0.6603	0.2532	Strong binder
RSYLTPGDSSSGW	surface_glycopr	2	HLA-B58:01	0.7184	0.2544	Strong binder
SGWTAGAAAYY	surface_glycopr	12	HLA-A26:01	0.3735	0.2645	Strong binder
NTNSSPDDQIGY	N_protein_77-87	8	HLA-A01:01	0.4936	0.2993	Strong binder
SIIAYTMSL	surface_glycopr	19	HLA-A02:01	0.58	0.2998	Strong binder
SGWTAGAAAYY	surface_glycopr	12	HLA-A01:01	0.4928	0.3001	Strong binder
KLNDLCFTNV	surface_glycopr	10	HLA-A02:01	0.5334	0.3539	Strong binder
VASQSIIAY	surface_glycopr	15	HLA-A26:01	0.3014	0.3557	Strong binder
SSPDDQIGYYR	N_protein_77-87	11	HLA-A01:01	0.4327	0.3596	Strong binder
VASQSIIAY	surface_glycopr	15	HLA-A01:01	0.4265	0.3658	Strong binder
CYGVSPTKL	surface_glycopr	3	HLA-A24:02	0.4241	0.379	Strong binder
TNSSPDDQIGYY	N_protein_77-87	9	HLA-A01:01	0.4058	0.3863	Strong binder
SSPDDQIGYY	N_protein_77-87	11	HLA-A26:01	0.2745	0.3956	Strong binder
SSGWTAGAAAYY	surface_glycopr	11	HLA-A01:01	0.3896	0.4036	Strong binder
SQSIIAYTM	surface_glycopr	17	HLA-B15:01	0.5322	0.4115	Strong binder
GTTLPKGFY	N_protein_158-1	16	HLA-A01:01	0.3769	0.4224	Strong binder
SPRRARSV	surface_glycopr	8	HLA-B08:01	0.3436	0.4236	Strong binder
GWTAGAAAYY	surface_glycopr	13	HLA-A01:01	0.3668	0.4374	Strong binder
SIIAYTMSL	surface_glycopr	19	HLA-B08:01	0.3302	0.4478	Strong binder
SPRRARSVASQSI	surface_glycopr	8	HLA-B07:02	0.4411	0.463	Strong binder
LTPGDSSSGW	surface_glycopr	5	HLA-B58:01	0.5303	0.4697	Strong binder
SYLTPGDSSSGW	surface_glycopr	3	HLA-A24:02	0.3344	0.4877	Strong binder
QLPQGTTLPK	N_protein_158-1	12	HLA-A03:01	0.478	0.4899	Strong binder
GWTAGAAAYY	surface_glycopr	13	HLA-A26:01	0.2181	0.5071	Weak binder
SSSGWTAGAAAYY	surface_glycopr	10	HLA-A01:01	0.3191	0.5095	Weak binder
YYRRATRRI	N_protein_77-87	19	HLA-A24:02	0.3193	0.5102	Weak binder
VASQSIIAY	surface_glycopr	15	HLA-B58:01	0.4897	0.5254	Weak binder
SIIAYTMSL	surface_glycopr	19	HLA-A26:01	0.211	0.5267	Weak binder
ARSVASQSI	surface_glycopr	12	HLA-B39:01	0.2657	0.5354	Weak binder
LQLPQGTTLPKGFY	N_protein_158-1	11	HLA-B15:01	0.455	0.5396	Weak binder
TRNPANNAA	N_protein_158-1	0	HLA-B39:01	0.2578	0.5516	Weak binder
SSGWTAGAAAYY	surface_glycopr	11	HLA-A26:01	0.1999	0.5573	Weak binder
SSSGWTAGAAAY	surface_glycopr	10	HLA-A01:01	0.27	0.5922	Weak binder
VLQLPQGTTL	N_protein_158-1	10	HLA-B15:01	0.4266	0.5933	Weak binder
SVASQSIIAY	surface_glycopr	14	HLA-A01:01	0.2644	0.6021	Weak binder
RSVASQSIIAY	surface_glycopr	13	HLA-B58:01	0.4264	0.6183	Weak binder
DSSSGWTAGAAAYY	surface_glycopr	9	HLA-A26:01	0.1736	0.637	Weak binder
SPRRARSVAS	surface_glycopr	8	HLA-B07:02	0.321	0.643	Weak binder
GAAAYYVGY	surface_glycopr	17	HLA-A26:01	0.1704	0.6478	Weak binder
SPTKLNDL	surface_glycopr	7	HLA-B07:02	0.318	0.649	Weak binder
SPDDQIGYY	N_protein_77-87	12	HLA-A26:01	0.1684	0.6546	Weak binder
VYADSFVI	surface_glycopr	19	HLA-A24:02	0.2344	0.6753	Weak binder
TNSSPDDQIGY	N_protein_77-87	9	HLA-A01:01	0.2284	0.6798	Weak binder
NNAAIVLQL	N_protein_158-1	5	HLA-B39:01	0.2024	0.6878	Weak binder
YLTPGDSSSGW	surface_glycopr	4	HLA-B58:01	0.3819	0.6945	Weak binder
LQLPQGTTL	N_protein_158-1	11	HLA-B40:01	0.2884	0.6958	Weak binder
ARSVASQSI	surface_glycopr	12	HLA-B27:05	0.3538	0.7161	Weak binder
ARSVASQSIIAY	surface_glycopr	12	HLA-B27:05	0.3509	0.7228	Weak binder
RSVASQSIIAY	surface_glycopr	13	HLA-B15:01	0.369	0.7242	Weak binder
WTAGAAAYYVGY	surface_glycopr	14	HLA-A01:01	0.2004	0.7549	Weak binder
NPANNAAIVL	N_protein_158-1	2	HLA-B07:02	0.2658	0.7581	Weak binder
QGTTLPKGFY	N_protein_158-1	15	HLA-A01:01	0.1933	0.776	Weak binder
VLQLPQGTTL	N_protein_158-1	10	HLA-A02:01	0.288	0.7968	Weak binder
PRGQGVPI	N_protein_77-87	0	HLA-B07:02	0.248	0.7971	Weak binder
NSPRRARSV	surface_glycopr	7	HLA-B08:01	0.1992	0.7987	Weak binder
TRNPANNAAIVL	N_protein_158-1	0	HLA-B39:01	0.1755	0.8003	Weak binder
TNSPRRARSVA	surface_glycopr	6	HLA-B07:02	0.2453	0.8032	Weak binder
NTNSSPDDQIGY	N_protein_77-87	8	HLA-A26:01	0.1293	0.8334	Weak binder
NSSPDDQIGY	N_protein_77-87	10	HLA-A26:01	0.129	0.8355	Weak binder
NSSPDDQIGYYR	N_protein_77-87	10	HLA-A01:01	0.174	0.8407	Weak binder
LPQGTTLPKGF	N_protein_158-1	13	HLA-B07:02	0.2293	0.8418	Weak binder
LQLPQGTTLPKGF	N_protein_158-1	11	HLA-B15:01	0.3149	0.858	Weak binder
LPKGFYAEX	N_protein_158-1	19	HLA-B07:02	0.2199	0.8646	Weak binder
GAAAYYVGY	surface_glycopr	17	HLA-B15:01	0.3034	0.8869	Weak binder
LNDLCFTNVY	surface_glycopr	11	HLA-A01:01	0.1569	0.9049	Weak binder
KCYGVSPTKL	surface_glycopr	2	HLA-A24:02	0.1627	0.9055	Weak binder
WTAGAAAYY	surface_glycopr	14	HLA-B15:01	0.2966	0.9056	Weak binder
WTAGAAAYYVGY	surface_glycopr	14	HLA-A26:01	0.1188	0.9085	Weak binder
TTLPKGFY	N_protein_158-1	17	HLA-A01:01	0.1542	0.9203	Weak binder
INTNSSPDDQIGYY	N_protein_77-87	7	HLA-A01:01	0.1526	0.9293	Weak binder
SSSGWTAGAAAYY	surface_glycopr	10	HLA-A26:01	0.1155	0.9313	Weak binder
NSPRRARSVA	surface_glycopr	7	HLA-B07:02	0.194	0.9358	Weak binder
SSGWTAGAAAY	surface_glycopr	11	HLA-A01:01	0.1508	0.9398	Weak binder
FTNVYADSF	surface_glycopr	16	HLA-A01:01	0.1474	0.9594	Weak binder
RSVASQSIIAY	surface_glycopr	13	HLA-A01:01	0.1448	0.9746	Weak binder
WTAGAAAY	surface_glycopr	14	HLA-A26:01	0.1091	0.9766	Weak binder
GTTLPKGFY	N_protein_158-1	16	HLA-A26:01	0.1076	0.9871	Weak binder
WTAGAAAY	surface_glycopr	14	HLA-A01:01	0.1341	1.0407	Weak binder
RARSVASQSI	surface_glycopr	11	HLA-B07:02	0.1616	1.0563	Weak binder
VLQLPQGTTLPK	N_protein_158-1	10	HLA-A03:01	0.2362	1.0626	Weak binder
VYADSFVIX	surface_glycopr	19	HLA-A24:02	0.1283	1.0805	Weak binder
LQLPQGTTL	N_protein_158-1	11	HLA-B08:01	0.1509	1.094	Weak binder
FTNVYADSF	surface_glycopr	16	HLA-A26:01	0.0941	1.1005	Weak binder
RRARSVASQ	surface_glycopr	10	HLA-B27:05	0.2111	1.1185	Weak binder
RNPANNAAIV	N_protein_158-1	1	HLA-B07:02	0.1474	1.1227	Weak binder
FTNVYADSF	surface_glycopr	16	HLA-B58:01	0.2152	1.1495	Weak binder
LQLPQGTTL	N_protein_158-1	11	HLA-A02:01	0.1971	1.1552	Weak binder
DSSSGWTAGAAAYY	surface_glycopr	9	HLA-A01:01	0.1175	1.156	Weak binder
SPTKLNDL	surface_glycopr	7	HLA-B08:01	0.1409	1.1714	Weak binder
LQLPQGTTLPK	N_protein_158-1	11	HLA-A03:01	0.2054	1.1945	Weak binder
ASQSIIAY	surface_glycopr	16	HLA-A01:01	0.1118	1.1986	Weak binder
NSSPDDQIGYY	N_protein_77-87	10	HLA-A26:01	0.0844	1.2074	Weak binder
SQSIIAYTM	surface_glycopr	17	HLA-B40:01	0.1174	1.2167	Weak binder
NTNSSPDDQIGYY	N_protein_77-87	8	HLA-A26:01	0.0824	1.2349	Weak binder
SPTKLNDLCF	surface_glycopr	7	HLA-B07:02	0.1256	1.2465	Weak binder
QLPQGTTLPKGFY	N_protein_158-1	12	HLA-A01:01	0.1045	1.2531	Weak binder
SVASQSIIAY	surface_glycopr	14	HLA-A03:01	0.1921	1.2586	Weak binder
DSSSGWTAGAAAY	surface_glycopr	9	HLA-A01:01	0.1019	1.2727	Weak binder
RSVASQSII	surface_glycopr	13	HLA-B58:01	0.185	1.2776	Weak binder
RRARSVASQSIIAY	surface_glycopr	10	HLA-B27:05	0.1714	1.2893	Weak binder
KLNDLCFTNVY	surface_glycopr	10	HLA-A01:01	0.0993	1.2922	Weak binder
QTNSPRRAR	surface_glycopr	5	HLA-A03:01	0.184	1.2975	Weak binder
SPDDQIGYY	N_protein_77-87	12	HLA-B07:02	0.1178	1.3063	Weak binder
IVLQLPQGTTL	N_protein_158-1	9	HLA-B15:01	0.2002	1.3274	Weak binder
ASYQTQTNSPR	surface_glycopr	0	HLA-A03:01	0.1738	1.3498	Weak binder
SIIAYTMSL	surface_glycopr	19	HLA-B07:02	0.112	1.3547	Weak binder
TRNPANNAAI	N_protein_158-1	0	HLA-B39:01	0.0958	1.3595	Weak binder
FKCYGVSPTKL	surface_glycopr	1	HLA-A24:02	0.087	1.3617	Weak binder
NPANNAAIV	N_protein_158-1	2	HLA-B07:02	0.1097	1.3739	Weak binder
TPGDSSSGW	surface_glycopr	6	HLA-B07:02	0.109	1.3801	Weak binder
GAAAYYVGY	surface_glycopr	17	HLA-A01:01	0.0885	1.3886	Weak binder
SPRRARSVASQSII	surface_glycopr	8	HLA-B07:02	0.1065	1.4007	Weak binder
TAGAAAYY	surface_glycopr	15	HLA-A01:01	0.0791	1.4958	Weak binder
SPDDQIGY	N_protein_77-87	12	HLA-A01:01	0.0764	1.5296	Weak binder
SSPDDQIGYYRR	N_protein_77-87	11	HLA-A01:01	0.0761	1.5339	Weak binder
SIIAYTMSL	surface_glycopr	19	HLA-B39:01	0.0774	1.5645	Weak binder
SPRRARSVASQ	surface_glycopr	8	HLA-B07:02	0.0807	1.6499	Weak binder
SPRRARSVA	surface_glycopr	8	HLA-B08:01	0.0968	1.6853	Weak binder
VLQLPQGTTL	N_protein_158-1	10	HLA-B39:01	0.069	1.6931	Weak binder
ASQSIIAY	surface_glycopr	16	HLA-B15:01	0.1457	1.7126	Weak binder
KLNDLCFTNVY	surface_glycopr	10	HLA-A03:01	0.1181	1.7284	Weak binder
TRNPANNAAIVLQL	N_protein_158-1	0	HLA-B27:05	0.1087	1.7293	Weak binder
INTNSSPDDQIGY	N_protein_77-87	7	HLA-A01:01	0.0621	1.736	Weak binder
QTNSPRRARSVA	surface_glycopr	5	HLA-B07:02	0.0725	1.7787	Weak binder
TFKCYGVSPTK	surface_glycopr	0	HLA-A03:01	0.1103	1.7989	Weak binder
AIVLQLPQGTTL	N_protein_158-1	8	HLA-B15:01	0.1362	1.8012	Weak binder
IVLQLPQGTTLPK	N_protein_158-1	9	HLA-A03:01	0.1085	1.818	Weak binder
VLQLPQGTTL	N_protein_158-1	10	HLA-B40:01	0.0472	1.855	Weak binder
QGTTLPKGFY	N_protein_158-1	15	HLA-A26:01	0.0459	1.881	Weak binder
RRARSVASQSI	surface_glycopr	10	HLA-B27:05	0.0927	1.8848	Weak binder
SSPDDQIGY	N_protein_77-87	11	HLA-B15:01	0.1275	1.8861	Weak binder
TNSSPDDQIGY	N_protein_77-87	9	HLA-A26:01	0.0457	1.8866	Weak binder
NTNSSPDDQIGYYR	N_protein_77-87	8	HLA-A01:01	0.0529	1.9138	Weak binder
GTTLPKGFY	N_protein_158-1	16	HLA-B15:01	0.1247	1.9156	Weak binder
LPQGTTLPKGFY	N_protein_158-1	13	HLA-A01:01	0.0523	1.9267	Weak binder
LQLPQGTTL	N_protein_158-1	11	HLA-A24:02	0.0459	1.9296	Weak binder
TTLPKGFYA	N_protein_158-1	17	HLA-A02:01	0.0953	1.9504	Weak binder
QLPQGTTLPKGF	N_protein_158-1	12	HLA-A24:02	0.0447	1.9535	Weak binder
ASQSIIAYTM	surface_glycopr	16	HLA-B58:01	0.0936	1.9865	Weak binder

## Sheet: HLA II
Peptide sequence - amino acide sequence of the predicted peptide binding HLA
Protein ID - unique ID for the protein that is the precursor of the detected peptide
Peptide start position - number of the first peptide amino acid in the sequence of the precursor protein
HLA class II allele - unique ID for HLA class II allele
EL score - the predition score based on neuron architecture, trained on an extensive dataset of Eluted Ligand (EL) mass spectrometry measurements, covering the three human HLA class II isotypes HLA-DR, HLA-DQ and HLA-DP
EL Rank - rank evaluated based on EL score
Binding level - predicted binding level based on EL Rank: we choose the threshold for strong and weak binders — 2% and 10% Rank, respectively
Peptide sequence	Protein ID	Peptide start position	HLA class II allele	EL score	EL Rank	Binding level
QTNSPRRARSVASQS	surface_glycoprotein_S1-S2_682-689	6	HLA-DPA10103-DPB10601	0.653974	0	Strong binder
TNSPRRARSVASQSI	surface_glycoprotein_S1-S2_682-689	7	HLA-DPA10103-DPB10601	0.797872	0	Strong binder
NSPRRARSVASQSII	surface_glycoprotein_S1-S2_682-689	8	HLA-DPA10103-DPB10601	0.820258	0	Strong binder
SPRRARSVASQSIIA	surface_glycoprotein_S1-S2_682-689	9	HLA-DPA10103-DPB10601	0.793414	0	Strong binder
PRRARSVASQSIIAY	surface_glycoprotein_S1-S2_682-689	10	HLA-DPA10103-DPB10601	0.621891	0	Strong binder
NPANNAAIVLQLPQG	N_protein_158-164	3	HLA-DQA10102-DQB10629	0.488568	0.02	Strong binder
NPANNAAIVLQLPQG	N_protein_158-164	3	HLA-DQA10106-DQB10629	0.488568	0.02	Strong binder
NPANNAAIVLQLPQG	N_protein_158-164	3	HLA-DQA10108-DQB10629	0.488568	0.02	Strong binder
NPANNAAIVLQLPQG	N_protein_158-164	3	HLA-DQA10109-DQB10629	0.488568	0.02	Strong binder
NPANNAAIVLQLPQG	N_protein_158-164	3	HLA-DQA10102-DQB10615	0.615928	0.03	Strong binder
NPANNAAIVLQLPQG	N_protein_158-164	3	HLA-DQA10103-DQB10615	0.634253	0.03	Strong binder
NPANNAAIVLQLPQG	N_protein_158-164	3	HLA-DQA10103-DQB10629	0.523055	0.03	Strong binder
NPANNAAIVLQLPQG	N_protein_158-164	3	HLA-DQA10106-DQB10615	0.615928	0.03	Strong binder
NPANNAAIVLQLPQG	N_protein_158-164	3	HLA-DQA10108-DQB10615	0.615928	0.03	Strong binder
NPANNAAIVLQLPQG	N_protein_158-164	3	HLA-DQA10109-DQB10615	0.615928	0.03	Strong binder
SSGWTAGAAAYYVGY	surface_glycoprotein_S1_254-260	12	HLA-DQA10501-DQB10304	0.626796	0.03	Strong binder
SSGWTAGAAAYYVGY	surface_glycoprotein_S1_254-260	12	HLA-DQA10501-DQB10314	0.626796	0.03	Strong binder
SSGWTAGAAAYYVGY	surface_glycoprotein_S1_254-260	12	HLA-DQA10503-DQB10304	0.626796	0.03	Strong binder
SSGWTAGAAAYYVGY	surface_glycoprotein_S1_254-260	12	HLA-DQA10503-DQB10314	0.626796	0.03	Strong binder
SSGWTAGAAAYYVGY	surface_glycoprotein_S1_254-260	12	HLA-DQA10504-DQB10304	0.626796	0.03	Strong binder
SSGWTAGAAAYYVGY	surface_glycoprotein_S1_254-260	12	HLA-DQA10504-DQB10314	0.626796	0.03	Strong binder
SSGWTAGAAAYYVGY	surface_glycoprotein_S1_254-260	12	HLA-DQA10505-DQB10304	0.626796	0.03	Strong binder
SSGWTAGAAAYYVGY	surface_glycoprotein_S1_254-260	12	HLA-DQA10505-DQB10314	0.626796	0.03	Strong binder
SSGWTAGAAAYYVGY	surface_glycoprotein_S1_254-260	12	HLA-DQA10506-DQB10304	0.626796	0.03	Strong binder
SSGWTAGAAAYYVGY	surface_glycoprotein_S1_254-260	12	HLA-DQA10506-DQB10314	0.626796	0.03	Strong binder
SSGWTAGAAAYYVGY	surface_glycoprotein_S1_254-260	12	HLA-DQA10507-DQB10304	0.626796	0.03	Strong binder
SSGWTAGAAAYYVGY	surface_glycoprotein_S1_254-260	12	HLA-DQA10507-DQB10314	0.626796	0.03	Strong binder
SSGWTAGAAAYYVGY	surface_glycoprotein_S1_254-260	12	HLA-DQA10508-DQB10304	0.626796	0.03	Strong binder
SSGWTAGAAAYYVGY	surface_glycoprotein_S1_254-260	12	HLA-DQA10508-DQB10314	0.626796	0.03	Strong binder
SSGWTAGAAAYYVGY	surface_glycoprotein_S1_254-260	12	HLA-DQA10509-DQB10304	0.626796	0.03	Strong binder
SSGWTAGAAAYYVGY	surface_glycoprotein_S1_254-260	12	HLA-DQA10509-DQB10314	0.626796	0.03	Strong binder
SSGWTAGAAAYYVGY	surface_glycoprotein_S1_254-260	12	HLA-DQA10510-DQB10304	0.626796	0.03	Strong binder
SSGWTAGAAAYYVGY	surface_glycoprotein_S1_254-260	12	HLA-DQA10510-DQB10314	0.626796	0.03	Strong binder
SSGWTAGAAAYYVGY	surface_glycoprotein_S1_254-260	12	HLA-DQA10511-DQB10304	0.626796	0.03	Strong binder
SSGWTAGAAAYYVGY	surface_glycoprotein_S1_254-260	12	HLA-DQA10511-DQB10314	0.626796	0.03	Strong binder
TQTNSPRRARSVASQ	surface_glycoprotein_S1-S2_682-689	5	HLA-DPA10103-DPB10601	0.311891	0.04	Strong binder
NPANNAAIVLQLPQG	N_protein_158-164	3	HLA-DQA10102-DQB10637	0.671932	0.04	Strong binder
NPANNAAIVLQLPQG	N_protein_158-164	3	HLA-DQA10103-DQB10637	0.676952	0.04	Strong binder
NPANNAAIVLQLPQG	N_protein_158-164	3	HLA-DQA10106-DQB10637	0.671932	0.04	Strong binder
NPANNAAIVLQLPQG	N_protein_158-164	3	HLA-DQA10108-DQB10637	0.671932	0.04	Strong binder
NPANNAAIVLQLPQG	N_protein_158-164	3	HLA-DQA10109-DQB10637	0.671932	0.04	Strong binder
SSGWTAGAAAYYVGY	surface_glycoprotein_S1_254-260	12	HLA-DQA10201-DQB10304	0.655346	0.04	Strong binder
SSGWTAGAAAYYVGY	surface_glycoprotein_S1_254-260	12	HLA-DQA10201-DQB10314	0.655346	0.04	Strong binder
SSGWTAGAAAYYVGY	surface_glycoprotein_S1_254-260	12	HLA-DQA10401-DQB10304	0.428785	0.04	Strong binder
SSGWTAGAAAYYVGY	surface_glycoprotein_S1_254-260	12	HLA-DQA10401-DQB10314	0.428785	0.04	Strong binder
SSGWTAGAAAYYVGY	surface_glycoprotein_S1_254-260	12	HLA-DQA10402-DQB10304	0.428785	0.04	Strong binder
SSGWTAGAAAYYVGY	surface_glycoprotein_S1_254-260	12	HLA-DQA10402-DQB10314	0.428785	0.04	Strong binder
SSGWTAGAAAYYVGY	surface_glycoprotein_S1_254-260	12	HLA-DQA10404-DQB10304	0.428785	0.04	Strong binder
SSGWTAGAAAYYVGY	surface_glycoprotein_S1_254-260	12	HLA-DQA10404-DQB10314	0.428785	0.04	Strong binder
SSSGWTAGAAAYYVG	surface_glycoprotein_S1_254-260	11	HLA-DQA10501-DQB10304	0.605086	0.04	Strong binder
SSSGWTAGAAAYYVG	surface_glycoprotein_S1_254-260	11	HLA-DQA10501-DQB10314	0.605086	0.04	Strong binder
SSSGWTAGAAAYYVG	surface_glycoprotein_S1_254-260	11	HLA-DQA10503-DQB10304	0.605086	0.04	Strong binder
SSSGWTAGAAAYYVG	surface_glycoprotein_S1_254-260	11	HLA-DQA10503-DQB10314	0.605086	0.04	Strong binder
SSSGWTAGAAAYYVG	surface_glycoprotein_S1_254-260	11	HLA-DQA10504-DQB10304	0.605086	0.04	Strong binder
SSSGWTAGAAAYYVG	surface_glycoprotein_S1_254-260	11	HLA-DQA10504-DQB10314	0.605086	0.04	Strong binder
SSSGWTAGAAAYYVG	surface_glycoprotein_S1_254-260	11	HLA-DQA10505-DQB10304	0.605086	0.04	Strong binder
SSSGWTAGAAAYYVG	surface_glycoprotein_S1_254-260	11	HLA-DQA10505-DQB10314	0.605086	0.04	Strong binder
SSSGWTAGAAAYYVG	surface_glycoprotein_S1_254-260	11	HLA-DQA10506-DQB10304	0.605086	0.04	Strong binder
SSSGWTAGAAAYYVG	surface_glycoprotein_S1_254-260	11	HLA-DQA10506-DQB10314	0.605086	0.04	Strong binder
SSSGWTAGAAAYYVG	surface_glycoprotein_S1_254-260	11	HLA-DQA10507-DQB10304	0.605086	0.04	Strong binder
SSSGWTAGAAAYYVG	surface_glycoprotein_S1_254-260	11	HLA-DQA10507-DQB10314	0.605086	0.04	Strong binder
SSSGWTAGAAAYYVG	surface_glycoprotein_S1_254-260	11	HLA-DQA10508-DQB10304	0.605086	0.04	Strong binder
SSSGWTAGAAAYYVG	surface_glycoprotein_S1_254-260	11	HLA-DQA10508-DQB10314	0.605086	0.04	Strong binder
SSSGWTAGAAAYYVG	surface_glycoprotein_S1_254-260	11	HLA-DQA10509-DQB10304	0.605086	0.04	Strong binder
SSSGWTAGAAAYYVG	surface_glycoprotein_S1_254-260	11	HLA-DQA10509-DQB10314	0.605086	0.04	Strong binder
SSSGWTAGAAAYYVG	surface_glycoprotein_S1_254-260	11	HLA-DQA10510-DQB10304	0.605086	0.04	Strong binder
SSSGWTAGAAAYYVG	surface_glycoprotein_S1_254-260	11	HLA-DQA10510-DQB10314	0.605086	0.04	Strong binder
SSSGWTAGAAAYYVG	surface_glycoprotein_S1_254-260	11	HLA-DQA10511-DQB10304	0.605086	0.04	Strong binder
SSSGWTAGAAAYYVG	surface_glycoprotein_S1_254-260	11	HLA-DQA10511-DQB10314	0.605086	0.04	Strong binder
SSGWTAGAAAYYVGY	surface_glycoprotein_S1_254-260	12	HLA-DQA10601-DQB10304	0.546377	0.04	Strong binder
SSGWTAGAAAYYVGY	surface_glycoprotein_S1_254-260	12	HLA-DQA10601-DQB10314	0.546377	0.04	Strong binder
SSGWTAGAAAYYVGY	surface_glycoprotein_S1_254-260	12	HLA-DQA10602-DQB10304	0.546377	0.04	Strong binder
SSGWTAGAAAYYVGY	surface_glycoprotein_S1_254-260	12	HLA-DQA10602-DQB10314	0.546377	0.04	Strong binder
LHRSYLTPGDSSSGW	surface_glycoprotein_S1_254-260	1	HLA-DPA10103-DPB10601	0.303294	0.05	Strong binder
NPANNAAIVLQLPQG	N_protein_158-164	3	HLA-DQA10101-DQB10629	0.1623	0.05	Strong binder
NPANNAAIVLQLPQG	N_protein_158-164	3	HLA-DQA10101-DQB10637	0.356115	0.05	Strong binder
NPANNAAIVLQLPQG	N_protein_158-164	3	HLA-DQA10104-DQB10629	0.1623	0.05	Strong binder
NPANNAAIVLQLPQG	N_protein_158-164	3	HLA-DQA10104-DQB10637	0.356115	0.05	Strong binder
NPANNAAIVLQLPQG	N_protein_158-164	3	HLA-DQA10105-DQB10629	0.1623	0.05	Strong binder
NPANNAAIVLQLPQG	N_protein_158-164	3	HLA-DQA10105-DQB10637	0.356115	0.05	Strong binder
NPANNAAIVLQLPQG	N_protein_158-164	3	HLA-DQA10107-DQB10629	0.1623	0.05	Strong binder
NPANNAAIVLQLPQG	N_protein_158-164	3	HLA-DQA10107-DQB10637	0.356115	0.05	Strong binder
SSSGWTAGAAAYYVG	surface_glycoprotein_S1_254-260	11	HLA-DQA10401-DQB10304	0.415007	0.05	Strong binder
SSSGWTAGAAAYYVG	surface_glycoprotein_S1_254-260	11	HLA-DQA10401-DQB10314	0.415007	0.05	Strong binder
SSSGWTAGAAAYYVG	surface_glycoprotein_S1_254-260	11	HLA-DQA10402-DQB10304	0.415007	0.05	Strong binder
SSSGWTAGAAAYYVG	surface_glycoprotein_S1_254-260	11	HLA-DQA10402-DQB10314	0.415007	0.05	Strong binder
SSSGWTAGAAAYYVG	surface_glycoprotein_S1_254-260	11	HLA-DQA10404-DQB10304	0.415007	0.05	Strong binder
SSSGWTAGAAAYYVG	surface_glycoprotein_S1_254-260	11	HLA-DQA10404-DQB10314	0.415007	0.05	Strong binder
NSPRRARSVASQSII	surface_glycoprotein_S1-S2_682-689	8	HLA-DPA10401-DPB10901	0.708368	0.06	Strong binder
NPANNAAIVLQLPQG	N_protein_158-164	3	HLA-DQA10101-DQB10615	0.322726	0.06	Strong binder
RNPANNAAIVLQLPQ	N_protein_158-164	2	HLA-DQA10102-DQB10615	0.571153	0.06	Strong binder
NPANNAAIVLQLPQG	N_protein_158-164	3	HLA-DQA10102-DQB10633	0.811014	0.06	Strong binder
NPANNAAIVLQLPQG	N_protein_158-164	3	HLA-DQA10102-DQB10642	0.397997	0.06	Strong binder
RNPANNAAIVLQLPQ	N_protein_158-164	2	HLA-DQA10103-DQB10629	0.477192	0.06	Strong binder
NPANNAAIVLQLPQG	N_protein_158-164	3	HLA-DQA10103-DQB10633	0.759095	0.06	Strong binder
NPANNAAIVLQLPQG	N_protein_158-164	3	HLA-DQA10104-DQB10615	0.322726	0.06	Strong binder
NPANNAAIVLQLPQG	N_protein_158-164	3	HLA-DQA10105-DQB10615	0.322726	0.06	Strong binder
RNPANNAAIVLQLPQ	N_protein_158-164	2	HLA-DQA10106-DQB10615	0.571153	0.06	Strong binder
NPANNAAIVLQLPQG	N_protein_158-164	3	HLA-DQA10106-DQB10633	0.811014	0.06	Strong binder
NPANNAAIVLQLPQG	N_protein_158-164	3	HLA-DQA10106-DQB10642	0.397997	0.06	Strong binder
NPANNAAIVLQLPQG	N_protein_158-164	3	HLA-DQA10107-DQB10615	0.322726	0.06	Strong binder
RNPANNAAIVLQLPQ	N_protein_158-164	2	HLA-DQA10108-DQB10615	0.571153	0.06	Strong binder
NPANNAAIVLQLPQG	N_protein_158-164	3	HLA-DQA10108-DQB10633	0.811014	0.06	Strong binder
NPANNAAIVLQLPQG	N_protein_158-164	3	HLA-DQA10108-DQB10642	0.397997	0.06	Strong binder
RNPANNAAIVLQLPQ	N_protein_158-164	2	HLA-DQA10109-DQB10615	0.571153	0.06	Strong binder
NPANNAAIVLQLPQG	N_protein_158-164	3	HLA-DQA10109-DQB10633	0.811014	0.06	Strong binder
NPANNAAIVLQLPQG	N_protein_158-164	3	HLA-DQA10109-DQB10642	0.397997	0.06	Strong binder
SSSGWTAGAAAYYVG	surface_glycoprotein_S1_254-260	11	HLA-DQA10601-DQB10304	0.528849	0.06	Strong binder
SSSGWTAGAAAYYVG	surface_glycoprotein_S1_254-260	11	HLA-DQA10601-DQB10314	0.528849	0.06	Strong binder
SSSGWTAGAAAYYVG	surface_glycoprotein_S1_254-260	11	HLA-DQA10602-DQB10304	0.528849	0.06	Strong binder
SSSGWTAGAAAYYVG	surface_glycoprotein_S1_254-260	11	HLA-DQA10602-DQB10314	0.528849	0.06	Strong binder
TNSPRRARSVASQSI	surface_glycoprotein_S1-S2_682-689	7	HLA-DPA10401-DPB10901	0.695294	0.07	Strong binder
SPRRARSVASQSIIA	surface_glycoprotein_S1-S2_682-689	9	HLA-DPA10401-DPB10901	0.693816	0.07	Strong binder
NPANNAAIVLQLPQG	N_protein_158-164	3	HLA-DQA10101-DQB10633	0.341512	0.07	Strong binder
NPANNAAIVLQLPQG	N_protein_158-164	3	HLA-DQA10102-DQB10601	0.649901	0.07	Strong binder
NPANNAAIVLQLPQG	N_protein_158-164	3	HLA-DQA10102-DQB10612	0.398824	0.07	Strong binder
RNPANNAAIVLQLPQ	N_protein_158-164	2	HLA-DQA10102-DQB10629	0.427879	0.07	Strong binder
NPANNAAIVLQLPQG	N_protein_158-164	3	HLA-DQA10102-DQB10635	0.649901	0.07	Strong binder
NPANNAAIVLQLPQG	N_protein_158-164	3	HLA-DQA10102-DQB10643	0.649901	0.07	Strong binder
NPANNAAIVLQLPQG	N_protein_158-164	3	HLA-DQA10103-DQB10602	0.784347	0.07	Strong binder
RNPANNAAIVLQLPQ	N_protein_158-164	2	HLA-DQA10103-DQB10615	0.602615	0.07	Strong binder
NPANNAAIVLQLPQG	N_protein_158-164	3	HLA-DQA10103-DQB10616	0.784347	0.07	Strong binder
NPANNAAIVLQLPQG	N_protein_158-164	3	HLA-DQA10103-DQB10619	0.784347	0.07	Strong binder
RNPANNAAIVLQLPQ	N_protein_158-164	2	HLA-DQA10103-DQB10637	0.647113	0.07	Strong binder
NPANNAAIVLQLPQG	N_protein_158-164	3	HLA-DQA10104-DQB10633	0.341512	0.07	Strong binder
NPANNAAIVLQLPQG	N_protein_158-164	3	HLA-DQA10105-DQB10633	0.341512	0.07	Strong binder
NPANNAAIVLQLPQG	N_protein_158-164	3	HLA-DQA10106-DQB10601	0.649901	0.07	Strong binder
NPANNAAIVLQLPQG	N_protein_158-164	3	HLA-DQA10106-DQB10612	0.398824	0.07	Strong binder
RNPANNAAIVLQLPQ	N_protein_158-164	2	HLA-DQA10106-DQB10629	0.427879	0.07	Strong binder
NPANNAAIVLQLPQG	N_protein_158-164	3	HLA-DQA10106-DQB10635	0.649901	0.07	Strong binder
NPANNAAIVLQLPQG	N_protein_158-164	3	HLA-DQA10106-DQB10643	0.649901	0.07	Strong binder
NPANNAAIVLQLPQG	N_protein_158-164	3	HLA-DQA10107-DQB10633	0.341512	0.07	Strong binder
NPANNAAIVLQLPQG	N_protein_158-164	3	HLA-DQA10108-DQB10601	0.649901	0.07	Strong binder
NPANNAAIVLQLPQG	N_protein_158-164	3	HLA-DQA10108-DQB10612	0.398824	0.07	Strong binder
RNPANNAAIVLQLPQ	N_protein_158-164	2	HLA-DQA10108-DQB10629	0.427879	0.07	Strong binder
NPANNAAIVLQLPQG	N_protein_158-164	3	HLA-DQA10108-DQB10635	0.649901	0.07	Strong binder
NPANNAAIVLQLPQG	N_protein_158-164	3	HLA-DQA10108-DQB10643	0.649901	0.07	Strong binder
NPANNAAIVLQLPQG	N_protein_158-164	3	HLA-DQA10109-DQB10601	0.649901	0.07	Strong binder
NPANNAAIVLQLPQG	N_protein_158-164	3	HLA-DQA10109-DQB10612	0.398824	0.07	Strong binder
RNPANNAAIVLQLPQ	N_protein_158-164	2	HLA-DQA10109-DQB10629	0.427879	0.07	Strong binder
NPANNAAIVLQLPQG	N_protein_158-164	3	HLA-DQA10109-DQB10635	0.649901	0.07	Strong binder
NPANNAAIVLQLPQG	N_protein_158-164	3	HLA-DQA10109-DQB10643	0.649901	0.07	Strong binder
SSSGWTAGAAAYYVG	surface_glycoprotein_S1_254-260	11	HLA-DQA10201-DQB10304	0.632904	0.07	Strong binder
SSSGWTAGAAAYYVG	surface_glycoprotein_S1_254-260	11	HLA-DQA10201-DQB10314	0.632904	0.07	Strong binder
SSGWTAGAAAYYVGY	surface_glycoprotein_S1_254-260	12	HLA-DQA10401-DQB10601	0.554635	0.07	Strong binder
SSGWTAGAAAYYVGY	surface_glycoprotein_S1_254-260	12	HLA-DQA10401-DQB10635	0.554635	0.07	Strong binder
SSGWTAGAAAYYVGY	surface_glycoprotein_S1_254-260	12	HLA-DQA10401-DQB10643	0.554635	0.07	Strong binder
SSGWTAGAAAYYVGY	surface_glycoprotein_S1_254-260	12	HLA-DQA10402-DQB10601	0.554635	0.07	Strong binder
SSGWTAGAAAYYVGY	surface_glycoprotein_S1_254-260	12	HLA-DQA10402-DQB10635	0.554635	0.07	Strong binder
SSGWTAGAAAYYVGY	surface_glycoprotein_S1_254-260	12	HLA-DQA10402-DQB10643	0.554635	0.07	Strong binder
SSGWTAGAAAYYVGY	surface_glycoprotein_S1_254-260	12	HLA-DQA10404-DQB10601	0.554635	0.07	Strong binder
SSGWTAGAAAYYVGY	surface_glycoprotein_S1_254-260	12	HLA-DQA10404-DQB10635	0.554635	0.07	Strong binder
SSGWTAGAAAYYVGY	surface_glycoprotein_S1_254-260	12	HLA-DQA10404-DQB10643	0.554635	0.07	Strong binder
SSGWTAGAAAYYVGY	surface_glycoprotein_S1_254-260	12	HLA-DQA10601-DQB10601	0.582944	0.07	Strong binder
SSGWTAGAAAYYVGY	surface_glycoprotein_S1_254-260	12	HLA-DQA10601-DQB10635	0.582944	0.07	Strong binder
SSGWTAGAAAYYVGY	surface_glycoprotein_S1_254-260	12	HLA-DQA10601-DQB10643	0.582944	0.07	Strong binder
SSGWTAGAAAYYVGY	surface_glycoprotein_S1_254-260	12	HLA-DQA10602-DQB10601	0.582944	0.07	Strong binder
SSGWTAGAAAYYVGY	surface_glycoprotein_S1_254-260	12	HLA-DQA10602-DQB10635	0.582944	0.07	Strong binder
SSGWTAGAAAYYVGY	surface_glycoprotein_S1_254-260	12	HLA-DQA10602-DQB10643	0.582944	0.07	Strong binder
NPANNAAIVLQLPQG	N_protein_158-164	3	HLA-DQA10101-DQB10601	0.468099	0.08	Strong binder
NPANNAAIVLQLPQG	N_protein_158-164	3	HLA-DQA10101-DQB10602	0.363288	0.08	Strong binder
NPANNAAIVLQLPQG	N_protein_158-164	3	HLA-DQA10101-DQB10616	0.363288	0.08	Strong binder
NPANNAAIVLQLPQG	N_protein_158-164	3	HLA-DQA10101-DQB10619	0.363288	0.08	Strong binder
NPANNAAIVLQLPQG	N_protein_158-164	3	HLA-DQA10101-DQB10635	0.468099	0.08	Strong binder
NPANNAAIVLQLPQG	N_protein_158-164	3	HLA-DQA10101-DQB10643	0.468099	0.08	Strong binder
NPANNAAIVLQLPQG	N_protein_158-164	3	HLA-DQA10102-DQB10602	0.827336	0.08	Strong binder
NPANNAAIVLQLPQG	N_protein_158-164	3	HLA-DQA10102-DQB10610	0.489997	0.08	Strong binder
NPANNAAIVLQLPQG	N_protein_158-164	3	HLA-DQA10102-DQB10611	0.68529	0.08	Strong binder
NPANNAAIVLQLPQG	N_protein_158-164	3	HLA-DQA10102-DQB10616	0.827336	0.08	Strong binder
NPANNAAIVLQLPQG	N_protein_158-164	3	HLA-DQA10102-DQB10619	0.827336	0.08	Strong binder
RNPANNAAIVLQLPQ	N_protein_158-164	2	HLA-DQA10102-DQB10637	0.626979	0.08	Strong binder
NPANNAAIVLQLPQG	N_protein_158-164	3	HLA-DQA10103-DQB10611	0.686128	0.08	Strong binder
NPANNAAIVLQLPQG	N_protein_158-164	3	HLA-DQA10103-DQB10612	0.442634	0.08	Strong binder
NPANNAAIVLQLPQG	N_protein_158-164	3	HLA-DQA10103-DQB10624	0.746945	0.08	Strong binder
NPANNAAIVLQLPQG	N_protein_158-164	3	HLA-DQA10103-DQB10642	0.434451	0.08	Strong binder
NPANNAAIVLQLPQG	N_protein_158-164	3	HLA-DQA10104-DQB10601	0.468099	0.08	Strong binder
NPANNAAIVLQLPQG	N_protein_158-164	3	HLA-DQA10104-DQB10602	0.363288	0.08	Strong binder
NPANNAAIVLQLPQG	N_protein_158-164	3	HLA-DQA10104-DQB10616	0.363288	0.08	Strong binder
NPANNAAIVLQLPQG	N_protein_158-164	3	HLA-DQA10104-DQB10619	0.363288	0.08	Strong binder
NPANNAAIVLQLPQG	N_protein_158-164	3	HLA-DQA10104-DQB10635	0.468099	0.08	Strong binder
NPANNAAIVLQLPQG	N_protein_158-164	3	HLA-DQA10104-DQB10643	0.468099	0.08	Strong binder
NPANNAAIVLQLPQG	N_protein_158-164	3	HLA-DQA10105-DQB10601	0.468099	0.08	Strong binder
NPANNAAIVLQLPQG	N_protein_158-164	3	HLA-DQA10105-DQB10602	0.363288	0.08	Strong binder
NPANNAAIVLQLPQG	N_protein_158-164	3	HLA-DQA10105-DQB10616	0.363288	0.08	Strong binder
NPANNAAIVLQLPQG	N_protein_158-164	3	HLA-DQA10105-DQB10619	0.363288	0.08	Strong binder
NPANNAAIVLQLPQG	N_protein_158-164	3	HLA-DQA10105-DQB10635	0.468099	0.08	Strong binder
NPANNAAIVLQLPQG	N_protein_158-164	3	HLA-DQA10105-DQB10643	0.468099	0.08	Strong binder
NPANNAAIVLQLPQG	N_protein_158-164	3	HLA-DQA10106-DQB10602	0.827336	0.08	Strong binder
NPANNAAIVLQLPQG	N_protein_158-164	3	HLA-DQA10106-DQB10610	0.489997	0.08	Strong binder
NPANNAAIVLQLPQG	N_protein_158-164	3	HLA-DQA10106-DQB10611	0.68529	0.08	Strong binder
NPANNAAIVLQLPQG	N_protein_158-164	3	HLA-DQA10106-DQB10616	0.827336	0.08	Strong binder
NPANNAAIVLQLPQG	N_protein_158-164	3	HLA-DQA10106-DQB10619	0.827336	0.08	Strong binder
RNPANNAAIVLQLPQ	N_protein_158-164	2	HLA-DQA10106-DQB10637	0.626979	0.08	Strong binder
NPANNAAIVLQLPQG	N_protein_158-164	3	HLA-DQA10107-DQB10601	0.468099	0.08	Strong binder
NPANNAAIVLQLPQG	N_protein_158-164	3	HLA-DQA10107-DQB10602	0.363288	0.08	Strong binder
NPANNAAIVLQLPQG	N_protein_158-164	3	HLA-DQA10107-DQB10616	0.363288	0.08	Strong binder
NPANNAAIVLQLPQG	N_protein_158-164	3	HLA-DQA10107-DQB10619	0.363288	0.08	Strong binder
NPANNAAIVLQLPQG	N_protein_158-164	3	HLA-DQA10107-DQB10635	0.468099	0.08	Strong binder
NPANNAAIVLQLPQG	N_protein_158-164	3	HLA-DQA10107-DQB10643	0.468099	0.08	Strong binder
NPANNAAIVLQLPQG	N_protein_158-164	3	HLA-DQA10108-DQB10602	0.827336	0.08	Strong binder
NPANNAAIVLQLPQG	N_protein_158-164	3	HLA-DQA10108-DQB10610	0.489997	0.08	Strong binder
NPANNAAIVLQLPQG	N_protein_158-164	3	HLA-DQA10108-DQB10611	0.68529	0.08	Strong binder
NPANNAAIVLQLPQG	N_protein_158-164	3	HLA-DQA10108-DQB10616	0.827336	0.08	Strong binder
NPANNAAIVLQLPQG	N_protein_158-164	3	HLA-DQA10108-DQB10619	0.827336	0.08	Strong binder
RNPANNAAIVLQLPQ	N_protein_158-164	2	HLA-DQA10108-DQB10637	0.626979	0.08	Strong binder
NPANNAAIVLQLPQG	N_protein_158-164	3	HLA-DQA10109-DQB10602	0.827336	0.08	Strong binder
NPANNAAIVLQLPQG	N_protein_158-164	3	HLA-DQA10109-DQB10610	0.489997	0.08	Strong binder
NPANNAAIVLQLPQG	N_protein_158-164	3	HLA-DQA10109-DQB10611	0.68529	0.08	Strong binder
NPANNAAIVLQLPQG	N_protein_158-164	3	HLA-DQA10109-DQB10616	0.827336	0.08	Strong binder
NPANNAAIVLQLPQG	N_protein_158-164	3	HLA-DQA10109-DQB10619	0.827336	0.08	Strong binder
RNPANNAAIVLQLPQ	N_protein_158-164	2	HLA-DQA10109-DQB10637	0.626979	0.08	Strong binder
NSPRRARSVASQSII	surface_glycoprotein_S1-S2_682-689	8	HLA-DPA10103-DPB10901	0.690166	0.09	Strong binder
NSPRRARSVASQSII	surface_glycoprotein_S1-S2_682-689	8	HLA-DPA10103-DPB11401	0.79316	0.09	Strong binder
NSPRRARSVASQSII	surface_glycoprotein_S1-S2_682-689	8	HLA-DPA10104-DPB10901	0.690166	0.09	Strong binder
NSPRRARSVASQSII	surface_glycoprotein_S1-S2_682-689	8	HLA-DPA10104-DPB11401	0.79316	0.09	Strong binder
NSPRRARSVASQSII	surface_glycoprotein_S1-S2_682-689	8	HLA-DPA10105-DPB10901	0.690166	0.09	Strong binder
NSPRRARSVASQSII	surface_glycoprotein_S1-S2_682-689	8	HLA-DPA10105-DPB11401	0.79316	0.09	Strong binder
NSPRRARSVASQSII	surface_glycoprotein_S1-S2_682-689	8	HLA-DPA10107-DPB10901	0.690166	0.09	Strong binder
NSPRRARSVASQSII	surface_glycoprotein_S1-S2_682-689	8	HLA-DPA10107-DPB11401	0.79316	0.09	Strong binder
NSPRRARSVASQSII	surface_glycoprotein_S1-S2_682-689	8	HLA-DPA10108-DPB10901	0.690166	0.09	Strong binder
NSPRRARSVASQSII	surface_glycoprotein_S1-S2_682-689	8	HLA-DPA10108-DPB11401	0.79316	0.09	Strong binder
NSPRRARSVASQSII	surface_glycoprotein_S1-S2_682-689	8	HLA-DPA10109-DPB10901	0.690166	0.09	Strong binder
NSPRRARSVASQSII	surface_glycoprotein_S1-S2_682-689	8	HLA-DPA10109-DPB11401	0.79316	0.09	Strong binder
NSPRRARSVASQSII	surface_glycoprotein_S1-S2_682-689	8	HLA-DPA10110-DPB10901	0.690166	0.09	Strong binder
NSPRRARSVASQSII	surface_glycoprotein_S1-S2_682-689	8	HLA-DPA10110-DPB11401	0.79316	0.09	Strong binder
NSPRRARSVASQSII	surface_glycoprotein_S1-S2_682-689	8	HLA-DPA10203-DPB10901	0.690166	0.09	Strong binder
NSPRRARSVASQSII	surface_glycoprotein_S1-S2_682-689	8	HLA-DPA10203-DPB11401	0.79316	0.09	Strong binder
NSPRRARSVASQSII	surface_glycoprotein_S1-S2_682-689	8	HLA-DPA10302-DPB10901	0.662344	0.09	Strong binder
NSPRRARSVASQSII	surface_glycoprotein_S1-S2_682-689	8	HLA-DPA10401-DPB11401	0.743002	0.09	Strong binder
NSPRRARSVASQSII	surface_glycoprotein_S1-S2_682-689	8	HLA-DPA10401-DPB12901	0.707677	0.09	Strong binder
NSPRRARSVASQSII	surface_glycoprotein_S1-S2_682-689	8	HLA-DPA10401-DPB14401	0.707677	0.09	Strong binder
NPANNAAIVLQLPQG	N_protein_158-164	3	HLA-DQA10101-DQB10624	0.33079	0.09	Strong binder
NPANNAAIVLQLPQG	N_protein_158-164	3	HLA-DQA10102-DQB10624	0.788814	0.09	Strong binder
NPANNAAIVLQLPQG	N_protein_158-164	3	HLA-DQA10104-DQB10624	0.33079	0.09	Strong binder
NPANNAAIVLQLPQG	N_protein_158-164	3	HLA-DQA10105-DQB10624	0.33079	0.09	Strong binder
NPANNAAIVLQLPQG	N_protein_158-164	3	HLA-DQA10106-DQB10624	0.788814	0.09	Strong binder
NPANNAAIVLQLPQG	N_protein_158-164	3	HLA-DQA10107-DQB10624	0.33079	0.09	Strong binder
NPANNAAIVLQLPQG	N_protein_158-164	3	HLA-DQA10108-DQB10624	0.788814	0.09	Strong binder
NPANNAAIVLQLPQG	N_protein_158-164	3	HLA-DQA10109-DQB10624	0.788814	0.09	Strong binder
SSGWTAGAAAYYVGY	surface_glycoprotein_S1_254-260	12	HLA-DQA10401-DQB10622	0.247566	0.09	Strong binder
SSGWTAGAAAYYVGY	surface_glycoprotein_S1_254-260	12	HLA-DQA10402-DQB10622	0.247566	0.09	Strong binder
SSGWTAGAAAYYVGY	surface_glycoprotein_S1_254-260	12	HLA-DQA10404-DQB10622	0.247566	0.09	Strong binder
SPRRARSVASQSIIA	surface_glycoprotein_S1-S2_682-689	9	HLA-DPA10103-DPB11401	0.788381	0.1	Strong binder
SPRRARSVASQSIIA	surface_glycoprotein_S1-S2_682-689	9	HLA-DPA10104-DPB11401	0.788381	0.1	Strong binder
SPRRARSVASQSIIA	surface_glycoprotein_S1-S2_682-689	9	HLA-DPA10105-DPB11401	0.788381	0.1	Strong binder
SPRRARSVASQSIIA	surface_glycoprotein_S1-S2_682-689	9	HLA-DPA10107-DPB11401	0.788381	0.1	Strong binder
SPRRARSVASQSIIA	surface_glycoprotein_S1-S2_682-689	9	HLA-DPA10108-DPB11401	0.788381	0.1	Strong binder
SPRRARSVASQSIIA	surface_glycoprotein_S1-S2_682-689	9	HLA-DPA10109-DPB11401	0.788381	0.1	Strong binder
SPRRARSVASQSIIA	surface_glycoprotein_S1-S2_682-689	9	HLA-DPA10110-DPB11401	0.788381	0.1	Strong binder
SPRRARSVASQSIIA	surface_glycoprotein_S1-S2_682-689	9	HLA-DPA10203-DPB11401	0.788381	0.1	Strong binder
NSPRRARSVASQSII	surface_glycoprotein_S1-S2_682-689	8	HLA-DPA10401-DPB10601	0.79675	0.1	Strong binder
NSPRRARSVASQSII	surface_glycoprotein_S1-S2_682-689	8	HLA-DPA10401-DPB11001	0.658257	0.1	Strong binder
SPRRARSVASQSIIA	surface_glycoprotein_S1-S2_682-689	9	HLA-DPA10401-DPB11401	0.734228	0.1	Strong binder
NSPRRARSVASQSII	surface_glycoprotein_S1-S2_682-689	8	HLA-DPA10401-DPB13701	0.658257	0.1	Strong binder
NSPRRARSVASQSII	surface_glycoprotein_S1-S2_682-689	8	HLA-DPA10401-DPB18801	0.658257	0.1	Strong binder
NPANNAAIVLQLPQG	N_protein_158-164	3	HLA-DQA10103-DQB10610	0.502919	0.1	Strong binder
SSGWTAGAAAYYVGY	surface_glycoprotein_S1_254-260	12	HLA-DQA10501-DQB10601	0.534236	0.1	Strong binder
SSGWTAGAAAYYVGY	surface_glycoprotein_S1_254-260	12	HLA-DQA10501-DQB10635	0.534236	0.1	Strong binder
SSGWTAGAAAYYVGY	surface_glycoprotein_S1_254-260	12	HLA-DQA10501-DQB10643	0.534236	0.1	Strong binder
SSGWTAGAAAYYVGY	surface_glycoprotein_S1_254-260	12	HLA-DQA10503-DQB10601	0.534236	0.1	Strong binder
SSGWTAGAAAYYVGY	surface_glycoprotein_S1_254-260	12	HLA-DQA10503-DQB10635	0.534236	0.1	Strong binder
SSGWTAGAAAYYVGY	surface_glycoprotein_S1_254-260	12	HLA-DQA10503-DQB10643	0.534236	0.1	Strong binder
SSGWTAGAAAYYVGY	surface_glycoprotein_S1_254-260	12	HLA-DQA10504-DQB10601	0.534236	0.1	Strong binder
SSGWTAGAAAYYVGY	surface_glycoprotein_S1_254-260	12	HLA-DQA10504-DQB10635	0.534236	0.1	Strong binder
SSGWTAGAAAYYVGY	surface_glycoprotein_S1_254-260	12	HLA-DQA10504-DQB10643	0.534236	0.1	Strong binder
SSGWTAGAAAYYVGY	surface_glycoprotein_S1_254-260	12	HLA-DQA10505-DQB10601	0.534236	0.1	Strong binder
SSGWTAGAAAYYVGY	surface_glycoprotein_S1_254-260	12	HLA-DQA10505-DQB10635	0.534236	0.1	Strong binder
SSGWTAGAAAYYVGY	surface_glycoprotein_S1_254-260	12	HLA-DQA10505-DQB10643	0.534236	0.1	Strong binder
SSGWTAGAAAYYVGY	surface_glycoprotein_S1_254-260	12	HLA-DQA10506-DQB10601	0.534236	0.1	Strong binder
SSGWTAGAAAYYVGY	surface_glycoprotein_S1_254-260	12	HLA-DQA10506-DQB10635	0.534236	0.1	Strong binder
SSGWTAGAAAYYVGY	surface_glycoprotein_S1_254-260	12	HLA-DQA10506-DQB10643	0.534236	0.1	Strong binder
SSGWTAGAAAYYVGY	surface_glycoprotein_S1_254-260	12	HLA-DQA10507-DQB10601	0.534236	0.1	Strong binder
SSGWTAGAAAYYVGY	surface_glycoprotein_S1_254-260	12	HLA-DQA10507-DQB10635	0.534236	0.1	Strong binder
SSGWTAGAAAYYVGY	surface_glycoprotein_S1_254-260	12	HLA-DQA10507-DQB10643	0.534236	0.1	Strong binder
SSGWTAGAAAYYVGY	surface_glycoprotein_S1_254-260	12	HLA-DQA10508-DQB10601	0.534236	0.1	Strong binder
SSGWTAGAAAYYVGY	surface_glycoprotein_S1_254-260	12	HLA-DQA10508-DQB10635	0.534236	0.1	Strong binder
SSGWTAGAAAYYVGY	surface_glycoprotein_S1_254-260	12	HLA-DQA10508-DQB10643	0.534236	0.1	Strong binder
SSGWTAGAAAYYVGY	surface_glycoprotein_S1_254-260	12	HLA-DQA10509-DQB10601	0.534236	0.1	Strong binder
SSGWTAGAAAYYVGY	surface_glycoprotein_S1_254-260	12	HLA-DQA10509-DQB10635	0.534236	0.1	Strong binder
SSGWTAGAAAYYVGY	surface_glycoprotein_S1_254-260	12	HLA-DQA10509-DQB10643	0.534236	0.1	Strong binder
SSGWTAGAAAYYVGY	surface_glycoprotein_S1_254-260	12	HLA-DQA10510-DQB10601	0.534236	0.1	Strong binder
SSGWTAGAAAYYVGY	surface_glycoprotein_S1_254-260	12	HLA-DQA10510-DQB10635	0.534236	0.1	Strong binder
SSGWTAGAAAYYVGY	surface_glycoprotein_S1_254-260	12	HLA-DQA10510-DQB10643	0.534236	0.1	Strong binder
SSGWTAGAAAYYVGY	surface_glycoprotein_S1_254-260	12	HLA-DQA10511-DQB10601	0.534236	0.1	Strong binder
SSGWTAGAAAYYVGY	surface_glycoprotein_S1_254-260	12	HLA-DQA10511-DQB10635	0.534236	0.1	Strong binder
SSGWTAGAAAYYVGY	surface_glycoprotein_S1_254-260	12	HLA-DQA10511-DQB10643	0.534236	0.1	Strong binder
NSPRRARSVASQSII	surface_glycoprotein_S1-S2_682-689	8	HLA-DPA10401-DPB113101	0.757259	0.11	Strong binder
NSPRRARSVASQSII	surface_glycoprotein_S1-S2_682-689	8	HLA-DPA10401-DPB11701	0.757259	0.11	Strong binder
NSPRRARSVASQSII	surface_glycoprotein_S1-S2_682-689	8	HLA-DPA10401-DPB19301	0.757259	0.11	Strong binder
NPANNAAIVLQLPQG	N_protein_158-164	3	HLA-DQA10102-DQB10623	0.425358	0.11	Strong binder
NPANNAAIVLQLPQG	N_protein_158-164	3	HLA-DQA10106-DQB10623	0.425358	0.11	Strong binder
NPANNAAIVLQLPQG	N_protein_158-164	3	HLA-DQA10108-DQB10623	0.425358	0.11	Strong binder
NPANNAAIVLQLPQG	N_protein_158-164	3	HLA-DQA10109-DQB10623	0.425358	0.11	Strong binder
SSGWTAGAAAYYVGY	surface_glycoprotein_S1_254-260	12	HLA-DQA10201-DQB10601	0.55988	0.11	Strong binder
SSGWTAGAAAYYVGY	surface_glycoprotein_S1_254-260	12	HLA-DQA10201-DQB10635	0.55988	0.11	Strong binder
SSGWTAGAAAYYVGY	surface_glycoprotein_S1_254-260	12	HLA-DQA10201-DQB10643	0.55988	0.11	Strong binder
SSGWTAGAAAYYVGY	surface_glycoprotein_S1_254-260	12	HLA-DQA10401-DQB10313	0.665492	0.11	Strong binder
SSSGWTAGAAAYYVG	surface_glycoprotein_S1_254-260	11	HLA-DQA10401-DQB10622	0.242436	0.11	Strong binder
SSGWTAGAAAYYVGY	surface_glycoprotein_S1_254-260	12	HLA-DQA10402-DQB10313	0.665492	0.11	Strong binder
SSSGWTAGAAAYYVG	surface_glycoprotein_S1_254-260	11	HLA-DQA10402-DQB10622	0.242436	0.11	Strong binder
SSGWTAGAAAYYVGY	surface_glycoprotein_S1_254-260	12	HLA-DQA10404-DQB10313	0.665492	0.11	Strong binder
SSSGWTAGAAAYYVG	surface_glycoprotein_S1_254-260	11	HLA-DQA10404-DQB10622	0.242436	0.11	Strong binder
SSGWTAGAAAYYVGY	surface_glycoprotein_S1_254-260	12	HLA-DQA10601-DQB10301	0.709053	0.11	Strong binder
SSGWTAGAAAYYVGY	surface_glycoprotein_S1_254-260	12	HLA-DQA10601-DQB10309	0.709053	0.11	Strong binder
SSGWTAGAAAYYVGY	surface_glycoprotein_S1_254-260	12	HLA-DQA10601-DQB10310	0.709053	0.11	Strong binder
SSGWTAGAAAYYVGY	surface_glycoprotein_S1_254-260	12	HLA-DQA10601-DQB10313	0.750425	0.11	Strong binder
SSGWTAGAAAYYVGY	surface_glycoprotein_S1_254-260	12	HLA-DQA10601-DQB10316	0.709053	0.11	Strong binder
SSGWTAGAAAYYVGY	surface_glycoprotein_S1_254-260	12	HLA-DQA10601-DQB10319	0.709053	0.11	Strong binder
SSGWTAGAAAYYVGY	surface_glycoprotein_S1_254-260	12	HLA-DQA10601-DQB10321	0.709053	0.11	Strong binder
SSGWTAGAAAYYVGY	surface_glycoprotein_S1_254-260	12	HLA-DQA10601-DQB10322	0.709053	0.11	Strong binder
SSGWTAGAAAYYVGY	surface_glycoprotein_S1_254-260	12	HLA-DQA10601-DQB10324	0.709053	0.11	Strong binder
SSGWTAGAAAYYVGY	surface_glycoprotein_S1_254-260	12	HLA-DQA10601-DQB10327	0.709053	0.11	Strong binder
SSGWTAGAAAYYVGY	surface_glycoprotein_S1_254-260	12	HLA-DQA10601-DQB10328	0.72954	0.11	Strong binder
SSGWTAGAAAYYVGY	surface_glycoprotein_S1_254-260	12	HLA-DQA10601-DQB10329	0.709053	0.11	Strong binder
SSGWTAGAAAYYVGY	surface_glycoprotein_S1_254-260	12	HLA-DQA10601-DQB10335	0.709053	0.11	Strong binder
SSGWTAGAAAYYVGY	surface_glycoprotein_S1_254-260	12	HLA-DQA10601-DQB10336	0.709053	0.11	Strong binder
SSGWTAGAAAYYVGY	surface_glycoprotein_S1_254-260	12	HLA-DQA10602-DQB10301	0.709053	0.11	Strong binder
SSGWTAGAAAYYVGY	surface_glycoprotein_S1_254-260	12	HLA-DQA10602-DQB10309	0.709053	0.11	Strong binder
SSGWTAGAAAYYVGY	surface_glycoprotein_S1_254-260	12	HLA-DQA10602-DQB10310	0.709053	0.11	Strong binder
SSGWTAGAAAYYVGY	surface_glycoprotein_S1_254-260	12	HLA-DQA10602-DQB10313	0.750425	0.11	Strong binder
SSGWTAGAAAYYVGY	surface_glycoprotein_S1_254-260	12	HLA-DQA10602-DQB10316	0.709053	0.11	Strong binder
SSGWTAGAAAYYVGY	surface_glycoprotein_S1_254-260	12	HLA-DQA10602-DQB10319	0.709053	0.11	Strong binder
SSGWTAGAAAYYVGY	surface_glycoprotein_S1_254-260	12	HLA-DQA10602-DQB10321	0.709053	0.11	Strong binder
SSGWTAGAAAYYVGY	surface_glycoprotein_S1_254-260	12	HLA-DQA10602-DQB10322	0.709053	0.11	Strong binder
SSGWTAGAAAYYVGY	surface_glycoprotein_S1_254-260	12	HLA-DQA10602-DQB10324	0.709053	0.11	Strong binder
SSGWTAGAAAYYVGY	surface_glycoprotein_S1_254-260	12	HLA-DQA10602-DQB10327	0.709053	0.11	Strong binder
SSGWTAGAAAYYVGY	surface_glycoprotein_S1_254-260	12	HLA-DQA10602-DQB10328	0.72954	0.11	Strong binder
SSGWTAGAAAYYVGY	surface_glycoprotein_S1_254-260	12	HLA-DQA10602-DQB10329	0.709053	0.11	Strong binder
SSGWTAGAAAYYVGY	surface_glycoprotein_S1_254-260	12	HLA-DQA10602-DQB10335	0.709053	0.11	Strong binder
SSGWTAGAAAYYVGY	surface_glycoprotein_S1_254-260	12	HLA-DQA10602-DQB10336	0.709053	0.11	Strong binder
TNSPRRARSVASQSI	surface_glycoprotein_S1-S2_682-689	7	HLA-DPA10103-DPB10901	0.676249	0.12	Strong binder
SPRRARSVASQSIIA	surface_glycoprotein_S1-S2_682-689	9	HLA-DPA10103-DPB10901	0.676262	0.12	Strong binder
NSPRRARSVASQSII	surface_glycoprotein_S1-S2_682-689	8	HLA-DPA10103-DPB12901	0.71673	0.12	Strong binder
NSPRRARSVASQSII	surface_glycoprotein_S1-S2_682-689	8	HLA-DPA10103-DPB14401	0.71673	0.12	Strong binder
TNSPRRARSVASQSI	surface_glycoprotein_S1-S2_682-689	7	HLA-DPA10104-DPB10901	0.676249	0.12	Strong binder
SPRRARSVASQSIIA	surface_glycoprotein_S1-S2_682-689	9	HLA-DPA10104-DPB10901	0.676262	0.12	Strong binder
NSPRRARSVASQSII	surface_glycoprotein_S1-S2_682-689	8	HLA-DPA10104-DPB12901	0.71673	0.12	Strong binder
NSPRRARSVASQSII	surface_glycoprotein_S1-S2_682-689	8	HLA-DPA10104-DPB14401	0.71673	0.12	Strong binder
TNSPRRARSVASQSI	surface_glycoprotein_S1-S2_682-689	7	HLA-DPA10105-DPB10901	0.676249	0.12	Strong binder
SPRRARSVASQSIIA	surface_glycoprotein_S1-S2_682-689	9	HLA-DPA10105-DPB10901	0.676262	0.12	Strong binder
NSPRRARSVASQSII	surface_glycoprotein_S1-S2_682-689	8	HLA-DPA10105-DPB12901	0.71673	0.12	Strong binder
NSPRRARSVASQSII	surface_glycoprotein_S1-S2_682-689	8	HLA-DPA10105-DPB14401	0.71673	0.12	Strong binder
TNSPRRARSVASQSI	surface_glycoprotein_S1-S2_682-689	7	HLA-DPA10107-DPB10901	0.676249	0.12	Strong binder
SPRRARSVASQSIIA	surface_glycoprotein_S1-S2_682-689	9	HLA-DPA10107-DPB10901	0.676262	0.12	Strong binder
NSPRRARSVASQSII	surface_glycoprotein_S1-S2_682-689	8	HLA-DPA10107-DPB12901	0.71673	0.12	Strong binder
NSPRRARSVASQSII	surface_glycoprotein_S1-S2_682-689	8	HLA-DPA10107-DPB14401	0.71673	0.12	Strong binder
TNSPRRARSVASQSI	surface_glycoprotein_S1-S2_682-689	7	HLA-DPA10108-DPB10901	0.676249	0.12	Strong binder
SPRRARSVASQSIIA	surface_glycoprotein_S1-S2_682-689	9	HLA-DPA10108-DPB10901	0.676262	0.12	Strong binder
NSPRRARSVASQSII	surface_glycoprotein_S1-S2_682-689	8	HLA-DPA10108-DPB12901	0.71673	0.12	Strong binder
NSPRRARSVASQSII	surface_glycoprotein_S1-S2_682-689	8	HLA-DPA10108-DPB14401	0.71673	0.12	Strong binder
TNSPRRARSVASQSI	surface_glycoprotein_S1-S2_682-689	7	HLA-DPA10109-DPB10901	0.676249	0.12	Strong binder
SPRRARSVASQSIIA	surface_glycoprotein_S1-S2_682-689	9	HLA-DPA10109-DPB10901	0.676262	0.12	Strong binder
NSPRRARSVASQSII	surface_glycoprotein_S1-S2_682-689	8	HLA-DPA10109-DPB12901	0.71673	0.12	Strong binder
NSPRRARSVASQSII	surface_glycoprotein_S1-S2_682-689	8	HLA-DPA10109-DPB14401	0.71673	0.12	Strong binder
TNSPRRARSVASQSI	surface_glycoprotein_S1-S2_682-689	7	HLA-DPA10110-DPB10901	0.676249	0.12	Strong binder
SPRRARSVASQSIIA	surface_glycoprotein_S1-S2_682-689	9	HLA-DPA10110-DPB10901	0.676262	0.12	Strong binder
NSPRRARSVASQSII	surface_glycoprotein_S1-S2_682-689	8	HLA-DPA10110-DPB12901	0.71673	0.12	Strong binder
NSPRRARSVASQSII	surface_glycoprotein_S1-S2_682-689	8	HLA-DPA10110-DPB14401	0.71673	0.12	Strong binder
TNSPRRARSVASQSI	surface_glycoprotein_S1-S2_682-689	7	HLA-DPA10203-DPB10901	0.676249	0.12	Strong binder
SPRRARSVASQSIIA	surface_glycoprotein_S1-S2_682-689	9	HLA-DPA10203-DPB10901	0.676262	0.12	Strong binder
NSPRRARSVASQSII	surface_glycoprotein_S1-S2_682-689	8	HLA-DPA10203-DPB12901	0.71673	0.12	Strong binder
NSPRRARSVASQSII	surface_glycoprotein_S1-S2_682-689	8	HLA-DPA10203-DPB14401	0.71673	0.12	Strong binder
TNSPRRARSVASQSI	surface_glycoprotein_S1-S2_682-689	7	HLA-DPA10401-DPB10601	0.780938	0.12	Strong binder
TNSPRRARSVASQSI	surface_glycoprotein_S1-S2_682-689	7	HLA-DPA10401-DPB11001	0.640684	0.12	Strong binder
TNSPRRARSVASQSI	surface_glycoprotein_S1-S2_682-689	7	HLA-DPA10401-DPB11401	0.728618	0.12	Strong binder
TNSPRRARSVASQSI	surface_glycoprotein_S1-S2_682-689	7	HLA-DPA10401-DPB12901	0.689797	0.12	Strong binder
TNSPRRARSVASQSI	surface_glycoprotein_S1-S2_682-689	7	HLA-DPA10401-DPB13701	0.640684	0.12	Strong binder
TNSPRRARSVASQSI	surface_glycoprotein_S1-S2_682-689	7	HLA-DPA10401-DPB14401	0.689797	0.12	Strong binder
TNSPRRARSVASQSI	surface_glycoprotein_S1-S2_682-689	7	HLA-DPA10401-DPB18801	0.640684	0.12	Strong binder
RNPANNAAIVLQLPQ	N_protein_158-164	2	HLA-DQA10101-DQB10615	0.289029	0.12	Strong binder
NPANNAAIVLQLPQG	N_protein_158-164	3	HLA-DQA10103-DQB10601	0.647703	0.12	Strong binder
NPANNAAIVLQLPQG	N_protein_158-164	3	HLA-DQA10103-DQB10622	0.485909	0.12	Strong binder
NPANNAAIVLQLPQG	N_protein_158-164	3	HLA-DQA10103-DQB10635	0.647703	0.12	Strong binder
NPANNAAIVLQLPQG	N_protein_158-164	3	HLA-DQA10103-DQB10643	0.647703	0.12	Strong binder
RNPANNAAIVLQLPQ	N_protein_158-164	2	HLA-DQA10104-DQB10615	0.289029	0.12	Strong binder
RNPANNAAIVLQLPQ	N_protein_158-164	2	HLA-DQA10105-DQB10615	0.289029	0.12	Strong binder
RNPANNAAIVLQLPQ	N_protein_158-164	2	HLA-DQA10107-DQB10615	0.289029	0.12	Strong binder
SSGWTAGAAAYYVGY	surface_glycoprotein_S1_254-260	12	HLA-DQA10501-DQB10313	0.853943	0.12	Strong binder
SSGWTAGAAAYYVGY	surface_glycoprotein_S1_254-260	12	HLA-DQA10503-DQB10313	0.853943	0.12	Strong binder
SSGWTAGAAAYYVGY	surface_glycoprotein_S1_254-260	12	HLA-DQA10504-DQB10313	0.853943	0.12	Strong binder
SSGWTAGAAAYYVGY	surface_glycoprotein_S1_254-260	12	HLA-DQA10505-DQB10313	0.853943	0.12	Strong binder
SSGWTAGAAAYYVGY	surface_glycoprotein_S1_254-260	12	HLA-DQA10506-DQB10313	0.853943	0.12	Strong binder
SSGWTAGAAAYYVGY	surface_glycoprotein_S1_254-260	12	HLA-DQA10507-DQB10313	0.853943	0.12	Strong binder
SSGWTAGAAAYYVGY	surface_glycoprotein_S1_254-260	12	HLA-DQA10508-DQB10313	0.853943	0.12	Strong binder
SSGWTAGAAAYYVGY	surface_glycoprotein_S1_254-260	12	HLA-DQA10509-DQB10313	0.853943	0.12	Strong binder
SSGWTAGAAAYYVGY	surface_glycoprotein_S1_254-260	12	HLA-DQA10510-DQB10313	0.853943	0.12	Strong binder
SSGWTAGAAAYYVGY	surface_glycoprotein_S1_254-260	12	HLA-DQA10511-DQB10313	0.853943	0.12	Strong binder
SSSGWTAGAAAYYVG	surface_glycoprotein_S1_254-260	11	HLA-DQA10601-DQB10601	0.554184	0.12	Strong binder
SSSGWTAGAAAYYVG	surface_glycoprotein_S1_254-260	11	HLA-DQA10601-DQB10635	0.554184	0.12	Strong binder
SSSGWTAGAAAYYVG	surface_glycoprotein_S1_254-260	11	HLA-DQA10601-DQB10643	0.554184	0.12	Strong binder
SSSGWTAGAAAYYVG	surface_glycoprotein_S1_254-260	11	HLA-DQA10602-DQB10601	0.554184	0.12	Strong binder
SSSGWTAGAAAYYVG	surface_glycoprotein_S1_254-260	11	HLA-DQA10602-DQB10635	0.554184	0.12	Strong binder
SSSGWTAGAAAYYVG	surface_glycoprotein_S1_254-260	11	HLA-DQA10602-DQB10643	0.554184	0.12	Strong binder
TNSPRRARSVASQSI	surface_glycoprotein_S1-S2_682-689	7	HLA-DPA10103-DPB11401	0.77628	0.13	Strong binder
TNSPRRARSVASQSI	surface_glycoprotein_S1-S2_682-689	7	HLA-DPA10104-DPB11401	0.77628	0.13	Strong binder
TNSPRRARSVASQSI	surface_glycoprotein_S1-S2_682-689	7	HLA-DPA10105-DPB11401	0.77628	0.13	Strong binder
TNSPRRARSVASQSI	surface_glycoprotein_S1-S2_682-689	7	HLA-DPA10107-DPB11401	0.77628	0.13	Strong binder
TNSPRRARSVASQSI	surface_glycoprotein_S1-S2_682-689	7	HLA-DPA10108-DPB11401	0.77628	0.13	Strong binder
TNSPRRARSVASQSI	surface_glycoprotein_S1-S2_682-689	7	HLA-DPA10109-DPB11401	0.77628	0.13	Strong binder
TNSPRRARSVASQSI	surface_glycoprotein_S1-S2_682-689	7	HLA-DPA10110-DPB11401	0.77628	0.13	Strong binder
TNSPRRARSVASQSI	surface_glycoprotein_S1-S2_682-689	7	HLA-DPA10203-DPB11401	0.77628	0.13	Strong binder
SPRRARSVASQSIIA	surface_glycoprotein_S1-S2_682-689	9	HLA-DPA10302-DPB10901	0.642158	0.13	Strong binder
NSPRRARSVASQSII	surface_glycoprotein_S1-S2_682-689	8	HLA-DPA10302-DPB11401	0.715766	0.13	Strong binder
TNSPRRARSVASQSI	surface_glycoprotein_S1-S2_682-689	7	HLA-DPA10401-DPB113101	0.746844	0.13	Strong binder
TNSPRRARSVASQSI	surface_glycoprotein_S1-S2_682-689	7	HLA-DPA10401-DPB11701	0.746844	0.13	Strong binder
NSPRRARSVASQSII	surface_glycoprotein_S1-S2_682-689	8	HLA-DPA10401-DPB15401	0.572364	0.13	Strong binder
TNSPRRARSVASQSI	surface_glycoprotein_S1-S2_682-689	7	HLA-DPA10401-DPB19301	0.746844	0.13	Strong binder
NPANNAAIVLQLPQG	N_protein_158-164	3	HLA-DQA10101-DQB10611	0.250535	0.13	Strong binder
RNPANNAAIVLQLPQ	N_protein_158-164	2	HLA-DQA10101-DQB10637	0.298909	0.13	Strong binder
RNPANNAAIVLQLPQ	N_protein_158-164	2	HLA-DQA10102-DQB10601	0.61086	0.13	Strong binder
NPANNAAIVLQLPQG	N_protein_158-164	3	HLA-DQA10102-DQB10614	0.429862	0.13	Strong binder
PANNAAIVLQLPQGT	N_protein_158-164	4	HLA-DQA10102-DQB10615	0.519687	0.13	Strong binder
NPANNAAIVLQLPQG	N_protein_158-164	3	HLA-DQA10102-DQB10622	0.46321	0.13	Strong binder
RNPANNAAIVLQLPQ	N_protein_158-164	2	HLA-DQA10102-DQB10635	0.61086	0.13	Strong binder
RNPANNAAIVLQLPQ	N_protein_158-164	2	HLA-DQA10102-DQB10643	0.61086	0.13	Strong binder
NPANNAAIVLQLPQG	N_protein_158-164	3	HLA-DQA10103-DQB10623	0.418702	0.13	Strong binder
NPANNAAIVLQLPQG	N_protein_158-164	3	HLA-DQA10104-DQB10611	0.250535	0.13	Strong binder
RNPANNAAIVLQLPQ	N_protein_158-164	2	HLA-DQA10104-DQB10637	0.298909	0.13	Strong binder
NPANNAAIVLQLPQG	N_protein_158-164	3	HLA-DQA10105-DQB10611	0.250535	0.13	Strong binder
RNPANNAAIVLQLPQ	N_protein_158-164	2	HLA-DQA10105-DQB10637	0.298909	0.13	Strong binder
RNPANNAAIVLQLPQ	N_protein_158-164	2	HLA-DQA10106-DQB10601	0.61086	0.13	Strong binder
NPANNAAIVLQLPQG	N_protein_158-164	3	HLA-DQA10106-DQB10614	0.429862	0.13	Strong binder
PANNAAIVLQLPQGT	N_protein_158-164	4	HLA-DQA10106-DQB10615	0.519687	0.13	Strong binder
NPANNAAIVLQLPQG	N_protein_158-164	3	HLA-DQA10106-DQB10622	0.46321	0.13	Strong binder
RNPANNAAIVLQLPQ	N_protein_158-164	2	HLA-DQA10106-DQB10635	0.61086	0.13	Strong binder
RNPANNAAIVLQLPQ	N_protein_158-164	2	HLA-DQA10106-DQB10643	0.61086	0.13	Strong binder
NPANNAAIVLQLPQG	N_protein_158-164	3	HLA-DQA10107-DQB10611	0.250535	0.13	Strong binder
RNPANNAAIVLQLPQ	N_protein_158-164	2	HLA-DQA10107-DQB10637	0.298909	0.13	Strong binder
RNPANNAAIVLQLPQ	N_protein_158-164	2	HLA-DQA10108-DQB10601	0.61086	0.13	Strong binder
NPANNAAIVLQLPQG	N_protein_158-164	3	HLA-DQA10108-DQB10614	0.429862	0.13	Strong binder
PANNAAIVLQLPQGT	N_protein_158-164	4	HLA-DQA10108-DQB10615	0.519687	0.13	Strong binder
NPANNAAIVLQLPQG	N_protein_158-164	3	HLA-DQA10108-DQB10622	0.46321	0.13	Strong binder
RNPANNAAIVLQLPQ	N_protein_158-164	2	HLA-DQA10108-DQB10635	0.61086	0.13	Strong binder
RNPANNAAIVLQLPQ	N_protein_158-164	2	HLA-DQA10108-DQB10643	0.61086	0.13	Strong binder
RNPANNAAIVLQLPQ	N_protein_158-164	2	HLA-DQA10109-DQB10601	0.61086	0.13	Strong binder
NPANNAAIVLQLPQG	N_protein_158-164	3	HLA-DQA10109-DQB10614	0.429862	0.13	Strong binder
PANNAAIVLQLPQGT	N_protein_158-164	4	HLA-DQA10109-DQB10615	0.519687	0.13	Strong binder
NPANNAAIVLQLPQG	N_protein_158-164	3	HLA-DQA10109-DQB10622	0.46321	0.13	Strong binder
RNPANNAAIVLQLPQ	N_protein_158-164	2	HLA-DQA10109-DQB10635	0.61086	0.13	Strong binder
RNPANNAAIVLQLPQ	N_protein_158-164	2	HLA-DQA10109-DQB10643	0.61086	0.13	Strong binder
SSSGWTAGAAAYYVG	surface_glycoprotein_S1_254-260	11	HLA-DQA10401-DQB10601	0.526655	0.13	Strong binder
SSSGWTAGAAAYYVG	surface_glycoprotein_S1_254-260	11	HLA-DQA10401-DQB10635	0.526655	0.13	Strong binder
SSSGWTAGAAAYYVG	surface_glycoprotein_S1_254-260	11	HLA-DQA10401-DQB10643	0.526655	0.13	Strong binder
SSSGWTAGAAAYYVG	surface_glycoprotein_S1_254-260	11	HLA-DQA10402-DQB10601	0.526655	0.13	Strong binder
SSSGWTAGAAAYYVG	surface_glycoprotein_S1_254-260	11	HLA-DQA10402-DQB10635	0.526655	0.13	Strong binder
SSSGWTAGAAAYYVG	surface_glycoprotein_S1_254-260	11	HLA-DQA10402-DQB10643	0.526655	0.13	Strong binder
SSSGWTAGAAAYYVG	surface_glycoprotein_S1_254-260	11	HLA-DQA10404-DQB10601	0.526655	0.13	Strong binder
SSSGWTAGAAAYYVG	surface_glycoprotein_S1_254-260	11	HLA-DQA10404-DQB10635	0.526655	0.13	Strong binder
SSSGWTAGAAAYYVG	surface_glycoprotein_S1_254-260	11	HLA-DQA10404-DQB10643	0.526655	0.13	Strong binder
SSGWTAGAAAYYVGY	surface_glycoprotein_S1_254-260	12	HLA-DQA10601-DQB10622	0.250876	0.13	Strong binder
SSGWTAGAAAYYVGY	surface_glycoprotein_S1_254-260	12	HLA-DQA10602-DQB10622	0.250876	0.13	Strong binder
NSPRRARSVASQSII	surface_glycoprotein_S1-S2_682-689	8	HLA-DPA10104-DPB10601	0.820258	0.14	Strong binder
NSPRRARSVASQSII	surface_glycoprotein_S1-S2_682-689	8	HLA-DPA10105-DPB10601	0.820258	0.14	Strong binder
NSPRRARSVASQSII	surface_glycoprotein_S1-S2_682-689	8	HLA-DPA10107-DPB10601	0.820258	0.14	Strong binder
NSPRRARSVASQSII	surface_glycoprotein_S1-S2_682-689	8	HLA-DPA10108-DPB10601	0.820258	0.14	Strong binder
NSPRRARSVASQSII	surface_glycoprotein_S1-S2_682-689	8	HLA-DPA10109-DPB10601	0.820258	0.14	Strong binder
NSPRRARSVASQSII	surface_glycoprotein_S1-S2_682-689	8	HLA-DPA10110-DPB10601	0.820258	0.14	Strong binder
NSPRRARSVASQSII	surface_glycoprotein_S1-S2_682-689	8	HLA-DPA10203-DPB10601	0.820258	0.14	Strong binder
NSPRRARSVASQSII	surface_glycoprotein_S1-S2_682-689	8	HLA-DPA10302-DPB10601	0.703721	0.14	Strong binder
TNSPRRARSVASQSI	surface_glycoprotein_S1-S2_682-689	7	HLA-DPA10302-DPB10901	0.636086	0.14	Strong binder
NPANNAAIVLQLPQG	N_protein_158-164	3	HLA-DQA10101-DQB10623	0.171216	0.14	Strong binder
RNPANNAAIVLQLPQ	N_protein_158-164	2	HLA-DQA10102-DQB10612	0.367731	0.14	Strong binder
RNPANNAAIVLQLPQ	N_protein_158-164	2	HLA-DQA10102-DQB10633	0.737273	0.14	Strong binder
RNPANNAAIVLQLPQ	N_protein_158-164	2	HLA-DQA10102-DQB10642	0.360019	0.14	Strong binder
RNPANNAAIVLQLPQ	N_protein_158-164	2	HLA-DQA10103-DQB10602	0.732026	0.14	Strong binder
NPANNAAIVLQLPQG	N_protein_158-164	3	HLA-DQA10103-DQB10614	0.446865	0.14	Strong binder
RNPANNAAIVLQLPQ	N_protein_158-164	2	HLA-DQA10103-DQB10616	0.732026	0.14	Strong binder
RNPANNAAIVLQLPQ	N_protein_158-164	2	HLA-DQA10103-DQB10619	0.732026	0.14	Strong binder
RNPANNAAIVLQLPQ	N_protein_158-164	2	HLA-DQA10103-DQB10624	0.702766	0.14	Strong binder
PANNAAIVLQLPQGT	N_protein_158-164	4	HLA-DQA10103-DQB10629	0.422807	0.14	Strong binder
NPANNAAIVLQLPQG	N_protein_158-164	3	HLA-DQA10104-DQB10623	0.171216	0.14	Strong binder
NPANNAAIVLQLPQG	N_protein_158-164	3	HLA-DQA10105-DQB10623	0.171216	0.14	Strong binder
RNPANNAAIVLQLPQ	N_protein_158-164	2	HLA-DQA10106-DQB10612	0.367731	0.14	Strong binder
RNPANNAAIVLQLPQ	N_protein_158-164	2	HLA-DQA10106-DQB10633	0.737273	0.14	Strong binder
RNPANNAAIVLQLPQ	N_protein_158-164	2	HLA-DQA10106-DQB10642	0.360019	0.14	Strong binder
NPANNAAIVLQLPQG	N_protein_158-164	3	HLA-DQA10107-DQB10623	0.171216	0.14	Strong binder
RNPANNAAIVLQLPQ	N_protein_158-164	2	HLA-DQA10108-DQB10612	0.367731	0.14	Strong binder
RNPANNAAIVLQLPQ	N_protein_158-164	2	HLA-DQA10108-DQB10633	0.737273	0.14	Strong binder
RNPANNAAIVLQLPQ	N_protein_158-164	2	HLA-DQA10108-DQB10642	0.360019	0.14	Strong binder
RNPANNAAIVLQLPQ	N_protein_158-164	2	HLA-DQA10109-DQB10612	0.367731	0.14	Strong binder
RNPANNAAIVLQLPQ	N_protein_158-164	2	HLA-DQA10109-DQB10633	0.737273	0.14	Strong binder
RNPANNAAIVLQLPQ	N_protein_158-164	2	HLA-DQA10109-DQB10642	0.360019	0.14	Strong binder
SSGWTAGAAAYYVGY	surface_glycoprotein_S1_254-260	12	HLA-DQA10401-DQB10328	0.605132	0.14	Strong binder
SSGWTAGAAAYYVGY	surface_glycoprotein_S1_254-260	12	HLA-DQA10401-DQB10612	0.187256	0.14	Strong binder
SSGWTAGAAAYYVGY	surface_glycoprotein_S1_254-260	12	HLA-DQA10402-DQB10328	0.605132	0.14	Strong binder
SSGWTAGAAAYYVGY	surface_glycoprotein_S1_254-260	12	HLA-DQA10402-DQB10612	0.187256	0.14	Strong binder
SSGWTAGAAAYYVGY	surface_glycoprotein_S1_254-260	12	HLA-DQA10404-DQB10328	0.605132	0.14	Strong binder
SSGWTAGAAAYYVGY	surface_glycoprotein_S1_254-260	12	HLA-DQA10404-DQB10612	0.187256	0.14	Strong binder
SSGWTAGAAAYYVGY	surface_glycoprotein_S1_254-260	12	HLA-DQA10601-DQB10312	0.403715	0.14	Strong binder
SSGWTAGAAAYYVGY	surface_glycoprotein_S1_254-260	12	HLA-DQA10601-DQB10612	0.1972	0.14	Strong binder
SSGWTAGAAAYYVGY	surface_glycoprotein_S1_254-260	12	HLA-DQA10602-DQB10312	0.403715	0.14	Strong binder
SSGWTAGAAAYYVGY	surface_glycoprotein_S1_254-260	12	HLA-DQA10602-DQB10612	0.1972	0.14	Strong binder
SPRRARSVASQSIIA	surface_glycoprotein_S1-S2_682-689	9	HLA-DPA10302-DPB11401	0.706837	0.15	Strong binder
RNPANNAAIVLQLPQ	N_protein_158-164	2	HLA-DQA10103-DQB10633	0.691722	0.15	Strong binder
SSGWTAGAAAYYVGY	surface_glycoprotein_S1_254-260	12	HLA-DQA10401-DQB10301	0.579685	0.15	Strong binder
SSGWTAGAAAYYVGY	surface_glycoprotein_S1_254-260	12	HLA-DQA10401-DQB10309	0.579685	0.15	Strong binder
SSGWTAGAAAYYVGY	surface_glycoprotein_S1_254-260	12	HLA-DQA10401-DQB10310	0.579685	0.15	Strong binder
SSGWTAGAAAYYVGY	surface_glycoprotein_S1_254-260	12	HLA-DQA10401-DQB10316	0.579685	0.15	Strong binder
SSGWTAGAAAYYVGY	surface_glycoprotein_S1_254-260	12	HLA-DQA10401-DQB10319	0.579685	0.15	Strong binder
SSGWTAGAAAYYVGY	surface_glycoprotein_S1_254-260	12	HLA-DQA10401-DQB10321	0.579685	0.15	Strong binder
SSGWTAGAAAYYVGY	surface_glycoprotein_S1_254-260	12	HLA-DQA10401-DQB10322	0.579685	0.15	Strong binder
SSGWTAGAAAYYVGY	surface_glycoprotein_S1_254-260	12	HLA-DQA10401-DQB10324	0.579685	0.15	Strong binder
SSGWTAGAAAYYVGY	surface_glycoprotein_S1_254-260	12	HLA-DQA10401-DQB10327	0.579685	0.15	Strong binder
SSGWTAGAAAYYVGY	surface_glycoprotein_S1_254-260	12	HLA-DQA10401-DQB10329	0.579685	0.15	Strong binder
SSGWTAGAAAYYVGY	surface_glycoprotein_S1_254-260	12	HLA-DQA10401-DQB10335	0.579685	0.15	Strong binder
SSGWTAGAAAYYVGY	surface_glycoprotein_S1_254-260	12	HLA-DQA10401-DQB10336	0.579685	0.15	Strong binder
SSGWTAGAAAYYVGY	surface_glycoprotein_S1_254-260	12	HLA-DQA10402-DQB10301	0.579685	0.15	Strong binder
SSGWTAGAAAYYVGY	surface_glycoprotein_S1_254-260	12	HLA-DQA10402-DQB10309	0.579685	0.15	Strong binder
SSGWTAGAAAYYVGY	surface_glycoprotein_S1_254-260	12	HLA-DQA10402-DQB10310	0.579685	0.15	Strong binder
SSGWTAGAAAYYVGY	surface_glycoprotein_S1_254-260	12	HLA-DQA10402-DQB10316	0.579685	0.15	Strong binder
SSGWTAGAAAYYVGY	surface_glycoprotein_S1_254-260	12	HLA-DQA10402-DQB10319	0.579685	0.15	Strong binder
SSGWTAGAAAYYVGY	surface_glycoprotein_S1_254-260	12	HLA-DQA10402-DQB10321	0.579685	0.15	Strong binder
SSGWTAGAAAYYVGY	surface_glycoprotein_S1_254-260	12	HLA-DQA10402-DQB10322	0.579685	0.15	Strong binder
SSGWTAGAAAYYVGY	surface_glycoprotein_S1_254-260	12	HLA-DQA10402-DQB10324	0.579685	0.15	Strong binder
SSGWTAGAAAYYVGY	surface_glycoprotein_S1_254-260	12	HLA-DQA10402-DQB10327	0.579685	0.15	Strong binder
SSGWTAGAAAYYVGY	surface_glycoprotein_S1_254-260	12	HLA-DQA10402-DQB10329	0.579685	0.15	Strong binder
SSGWTAGAAAYYVGY	surface_glycoprotein_S1_254-260	12	HLA-DQA10402-DQB10335	0.579685	0.15	Strong binder
SSGWTAGAAAYYVGY	surface_glycoprotein_S1_254-260	12	HLA-DQA10402-DQB10336	0.579685	0.15	Strong binder
SSGWTAGAAAYYVGY	surface_glycoprotein_S1_254-260	12	HLA-DQA10404-DQB10301	0.579685	0.15	Strong binder
SSGWTAGAAAYYVGY	surface_glycoprotein_S1_254-260	12	HLA-DQA10404-DQB10309	0.579685	0.15	Strong binder
SSGWTAGAAAYYVGY	surface_glycoprotein_S1_254-260	12	HLA-DQA10404-DQB10310	0.579685	0.15	Strong binder
SSGWTAGAAAYYVGY	surface_glycoprotein_S1_254-260	12	HLA-DQA10404-DQB10316	0.579685	0.15	Strong binder
SSGWTAGAAAYYVGY	surface_glycoprotein_S1_254-260	12	HLA-DQA10404-DQB10319	0.579685	0.15	Strong binder
SSGWTAGAAAYYVGY	surface_glycoprotein_S1_254-260	12	HLA-DQA10404-DQB10321	0.579685	0.15	Strong binder
SSGWTAGAAAYYVGY	surface_glycoprotein_S1_254-260	12	HLA-DQA10404-DQB10322	0.579685	0.15	Strong binder
SSGWTAGAAAYYVGY	surface_glycoprotein_S1_254-260	12	HLA-DQA10404-DQB10324	0.579685	0.15	Strong binder
SSGWTAGAAAYYVGY	surface_glycoprotein_S1_254-260	12	HLA-DQA10404-DQB10327	0.579685	0.15	Strong binder
SSGWTAGAAAYYVGY	surface_glycoprotein_S1_254-260	12	HLA-DQA10404-DQB10329	0.579685	0.15	Strong binder
SSGWTAGAAAYYVGY	surface_glycoprotein_S1_254-260	12	HLA-DQA10404-DQB10335	0.579685	0.15	Strong binder
SSGWTAGAAAYYVGY	surface_glycoprotein_S1_254-260	12	HLA-DQA10404-DQB10336	0.579685	0.15	Strong binder
SSGWTAGAAAYYVGY	surface_glycoprotein_S1_254-260	12	HLA-DQA10501-DQB10328	0.836782	0.15	Strong binder
SSGWTAGAAAYYVGY	surface_glycoprotein_S1_254-260	12	HLA-DQA10503-DQB10328	0.836782	0.15	Strong binder
SSGWTAGAAAYYVGY	surface_glycoprotein_S1_254-260	12	HLA-DQA10504-DQB10328	0.836782	0.15	Strong binder
SSGWTAGAAAYYVGY	surface_glycoprotein_S1_254-260	12	HLA-DQA10505-DQB10328	0.836782	0.15	Strong binder
SSGWTAGAAAYYVGY	surface_glycoprotein_S1_254-260	12	HLA-DQA10506-DQB10328	0.836782	0.15	Strong binder
SSGWTAGAAAYYVGY	surface_glycoprotein_S1_254-260	12	HLA-DQA10507-DQB10328	0.836782	0.15	Strong binder
SSGWTAGAAAYYVGY	surface_glycoprotein_S1_254-260	12	HLA-DQA10508-DQB10328	0.836782	0.15	Strong binder
SSGWTAGAAAYYVGY	surface_glycoprotein_S1_254-260	12	HLA-DQA10509-DQB10328	0.836782	0.15	Strong binder
SSGWTAGAAAYYVGY	surface_glycoprotein_S1_254-260	12	HLA-DQA10510-DQB10328	0.836782	0.15	Strong binder
SSGWTAGAAAYYVGY	surface_glycoprotein_S1_254-260	12	HLA-DQA10511-DQB10328	0.836782	0.15	Strong binder
SSSGWTAGAAAYYVG	surface_glycoprotein_S1_254-260	11	HLA-DQA10601-DQB10313	0.73225	0.15	Strong binder
SSSGWTAGAAAYYVG	surface_glycoprotein_S1_254-260	11	HLA-DQA10602-DQB10313	0.73225	0.15	Strong binder
NSPRRARSVASQSII	surface_glycoprotein_S1-S2_682-689	8	HLA-DPA10103-DPB11001	0.632121	0.16	Strong binder
TNSPRRARSVASQSI	surface_glycoprotein_S1-S2_682-689	7	HLA-DPA10103-DPB12901	0.691478	0.16	Strong binder
NSPRRARSVASQSII	surface_glycoprotein_S1-S2_682-689	8	HLA-DPA10103-DPB13701	0.632121	0.16	Strong binder
TNSPRRARSVASQSI	surface_glycoprotein_S1-S2_682-689	7	HLA-DPA10103-DPB14401	0.691478	0.16	Strong binder
NSPRRARSVASQSII	surface_glycoprotein_S1-S2_682-689	8	HLA-DPA10103-DPB18801	0.632121	0.16	Strong binder
NSPRRARSVASQSII	surface_glycoprotein_S1-S2_682-689	8	HLA-DPA10104-DPB11001	0.632121	0.16	Strong binder
TNSPRRARSVASQSI	surface_glycoprotein_S1-S2_682-689	7	HLA-DPA10104-DPB12901	0.691478	0.16	Strong binder
NSPRRARSVASQSII	surface_glycoprotein_S1-S2_682-689	8	HLA-DPA10104-DPB13701	0.632121	0.16	Strong binder
TNSPRRARSVASQSI	surface_glycoprotein_S1-S2_682-689	7	HLA-DPA10104-DPB14401	0.691478	0.16	Strong binder
NSPRRARSVASQSII	surface_glycoprotein_S1-S2_682-689	8	HLA-DPA10104-DPB18801	0.632121	0.16	Strong binder
NSPRRARSVASQSII	surface_glycoprotein_S1-S2_682-689	8	HLA-DPA10105-DPB11001	0.632121	0.16	Strong binder
TNSPRRARSVASQSI	surface_glycoprotein_S1-S2_682-689	7	HLA-DPA10105-DPB12901	0.691478	0.16	Strong binder
NSPRRARSVASQSII	surface_glycoprotein_S1-S2_682-689	8	HLA-DPA10105-DPB13701	0.632121	0.16	Strong binder
TNSPRRARSVASQSI	surface_glycoprotein_S1-S2_682-689	7	HLA-DPA10105-DPB14401	0.691478	0.16	Strong binder
NSPRRARSVASQSII	surface_glycoprotein_S1-S2_682-689	8	HLA-DPA10105-DPB18801	0.632121	0.16	Strong binder
NSPRRARSVASQSII	surface_glycoprotein_S1-S2_682-689	8	HLA-DPA10107-DPB11001	0.632121	0.16	Strong binder
TNSPRRARSVASQSI	surface_glycoprotein_S1-S2_682-689	7	HLA-DPA10107-DPB12901	0.691478	0.16	Strong binder
NSPRRARSVASQSII	surface_glycoprotein_S1-S2_682-689	8	HLA-DPA10107-DPB13701	0.632121	0.16	Strong binder
TNSPRRARSVASQSI	surface_glycoprotein_S1-S2_682-689	7	HLA-DPA10107-DPB14401	0.691478	0.16	Strong binder
NSPRRARSVASQSII	surface_glycoprotein_S1-S2_682-689	8	HLA-DPA10107-DPB18801	0.632121	0.16	Strong binder
NSPRRARSVASQSII	surface_glycoprotein_S1-S2_682-689	8	HLA-DPA10108-DPB11001	0.632121	0.16	Strong binder
TNSPRRARSVASQSI	surface_glycoprotein_S1-S2_682-689	7	HLA-DPA10108-DPB12901	0.691478	0.16	Strong binder
NSPRRARSVASQSII	surface_glycoprotein_S1-S2_682-689	8	HLA-DPA10108-DPB13701	0.632121	0.16	Strong binder
TNSPRRARSVASQSI	surface_glycoprotein_S1-S2_682-689	7	HLA-DPA10108-DPB14401	0.691478	0.16	Strong binder
NSPRRARSVASQSII	surface_glycoprotein_S1-S2_682-689	8	HLA-DPA10108-DPB18801	0.632121	0.16	Strong binder
NSPRRARSVASQSII	surface_glycoprotein_S1-S2_682-689	8	HLA-DPA10109-DPB11001	0.632121	0.16	Strong binder
TNSPRRARSVASQSI	surface_glycoprotein_S1-S2_682-689	7	HLA-DPA10109-DPB12901	0.691478	0.16	Strong binder
NSPRRARSVASQSII	surface_glycoprotein_S1-S2_682-689	8	HLA-DPA10109-DPB13701	0.632121	0.16	Strong binder
TNSPRRARSVASQSI	surface_glycoprotein_S1-S2_682-689	7	HLA-DPA10109-DPB14401	0.691478	0.16	Strong binder
NSPRRARSVASQSII	surface_glycoprotein_S1-S2_682-689	8	HLA-DPA10109-DPB18801	0.632121	0.16	Strong binder
NSPRRARSVASQSII	surface_glycoprotein_S1-S2_682-689	8	HLA-DPA10110-DPB11001	0.632121	0.16	Strong binder
TNSPRRARSVASQSI	surface_glycoprotein_S1-S2_682-689	7	HLA-DPA10110-DPB12901	0.691478	0.16	Strong binder
NSPRRARSVASQSII	surface_glycoprotein_S1-S2_682-689	8	HLA-DPA10110-DPB13701	0.632121	0.16	Strong binder
TNSPRRARSVASQSI	surface_glycoprotein_S1-S2_682-689	7	HLA-DPA10110-DPB14401	0.691478	0.16	Strong binder
NSPRRARSVASQSII	surface_glycoprotein_S1-S2_682-689	8	HLA-DPA10110-DPB18801	0.632121	0.16	Strong binder
NSPRRARSVASQSII	surface_glycoprotein_S1-S2_682-689	8	HLA-DPA10203-DPB11001	0.632121	0.16	Strong binder
TNSPRRARSVASQSI	surface_glycoprotein_S1-S2_682-689	7	HLA-DPA10203-DPB12901	0.691478	0.16	Strong binder
NSPRRARSVASQSII	surface_glycoprotein_S1-S2_682-689	8	HLA-DPA10203-DPB13701	0.632121	0.16	Strong binder
TNSPRRARSVASQSI	surface_glycoprotein_S1-S2_682-689	7	HLA-DPA10203-DPB14401	0.691478	0.16	Strong binder
NSPRRARSVASQSII	surface_glycoprotein_S1-S2_682-689	8	HLA-DPA10203-DPB18801	0.632121	0.16	Strong binder
NSPRRARSVASQSII	surface_glycoprotein_S1-S2_682-689	8	HLA-DPA10302-DPB12901	0.594223	0.16	Strong binder
NSPRRARSVASQSII	surface_glycoprotein_S1-S2_682-689	8	HLA-DPA10302-DPB14401	0.594223	0.16	Strong binder
SPRRARSVASQSIIA	surface_glycoprotein_S1-S2_682-689	9	HLA-DPA10401-DPB10601	0.758982	0.16	Strong binder
SPRRARSVASQSIIA	surface_glycoprotein_S1-S2_682-689	9	HLA-DPA10401-DPB12901	0.668959	0.16	Strong binder
SPRRARSVASQSIIA	surface_glycoprotein_S1-S2_682-689	9	HLA-DPA10401-DPB14401	0.668959	0.16	Strong binder
TNSPRRARSVASQSI	surface_glycoprotein_S1-S2_682-689	7	HLA-DPA10401-DPB15401	0.560453	0.16	Strong binder
NPANNAAIVLQLPQG	N_protein_158-164	3	HLA-DQA10101-DQB10612	0.177478	0.16	Strong binder
RNPANNAAIVLQLPQ	N_protein_158-164	2	HLA-DQA10101-DQB10633	0.271916	0.16	Strong binder
RNPANNAAIVLQLPQ	N_protein_158-164	2	HLA-DQA10103-DQB10611	0.637509	0.16	Strong binder
NPANNAAIVLQLPQG	N_protein_158-164	3	HLA-DQA10104-DQB10612	0.177478	0.16	Strong binder
RNPANNAAIVLQLPQ	N_protein_158-164	2	HLA-DQA10104-DQB10633	0.271916	0.16	Strong binder
NPANNAAIVLQLPQG	N_protein_158-164	3	HLA-DQA10105-DQB10612	0.177478	0.16	Strong binder
RNPANNAAIVLQLPQ	N_protein_158-164	2	HLA-DQA10105-DQB10633	0.271916	0.16	Strong binder
NPANNAAIVLQLPQG	N_protein_158-164	3	HLA-DQA10107-DQB10612	0.177478	0.16	Strong binder
RNPANNAAIVLQLPQ	N_protein_158-164	2	HLA-DQA10107-DQB10633	0.271916	0.16	Strong binder
SSGWTAGAAAYYVGY	surface_glycoprotein_S1_254-260	12	HLA-DQA10201-DQB10313	0.841534	0.16	Strong binder
SSGWTAGAAAYYVGY	surface_glycoprotein_S1_254-260	12	HLA-DQA10201-DQB10328	0.832403	0.16	Strong binder
SSGWTAGAAAYYVGY	surface_glycoprotein_S1_254-260	12	HLA-DQA10501-DQB10301	0.821014	0.16	Strong binder
SSGWTAGAAAYYVGY	surface_glycoprotein_S1_254-260	12	HLA-DQA10501-DQB10309	0.821014	0.16	Strong binder
SSGWTAGAAAYYVGY	surface_glycoprotein_S1_254-260	12	HLA-DQA10501-DQB10310	0.821014	0.16	Strong binder
SSGWTAGAAAYYVGY	surface_glycoprotein_S1_254-260	12	HLA-DQA10501-DQB10316	0.821014	0.16	Strong binder
SSGWTAGAAAYYVGY	surface_glycoprotein_S1_254-260	12	HLA-DQA10501-DQB10319	0.821014	0.16	Strong binder
SSGWTAGAAAYYVGY	surface_glycoprotein_S1_254-260	12	HLA-DQA10501-DQB10321	0.821014	0.16	Strong binder
SSGWTAGAAAYYVGY	surface_glycoprotein_S1_254-260	12	HLA-DQA10501-DQB10322	0.821014	0.16	Strong binder
SSGWTAGAAAYYVGY	surface_glycoprotein_S1_254-260	12	HLA-DQA10501-DQB10324	0.821014	0.16	Strong binder
SSGWTAGAAAYYVGY	surface_glycoprotein_S1_254-260	12	HLA-DQA10501-DQB10327	0.821014	0.16	Strong binder
SSGWTAGAAAYYVGY	surface_glycoprotein_S1_254-260	12	HLA-DQA10501-DQB10329	0.821014	0.16	Strong binder
SSGWTAGAAAYYVGY	surface_glycoprotein_S1_254-260	12	HLA-DQA10501-DQB10335	0.821014	0.16	Strong binder
SSGWTAGAAAYYVGY	surface_glycoprotein_S1_254-260	12	HLA-DQA10501-DQB10336	0.821014	0.16	Strong binder
SSSGWTAGAAAYYVG	surface_glycoprotein_S1_254-260	11	HLA-DQA10501-DQB10601	0.507373	0.16	Strong binder
SSSGWTAGAAAYYVG	surface_glycoprotein_S1_254-260	11	HLA-DQA10501-DQB10635	0.507373	0.16	Strong binder
SSSGWTAGAAAYYVG	surface_glycoprotein_S1_254-260	11	HLA-DQA10501-DQB10643	0.507373	0.16	Strong binder
SSGWTAGAAAYYVGY	surface_glycoprotein_S1_254-260	12	HLA-DQA10503-DQB10301	0.821014	0.16	Strong binder
SSGWTAGAAAYYVGY	surface_glycoprotein_S1_254-260	12	HLA-DQA10503-DQB10309	0.821014	0.16	Strong binder
SSGWTAGAAAYYVGY	surface_glycoprotein_S1_254-260	12	HLA-DQA10503-DQB10310	0.821014	0.16	Strong binder
SSGWTAGAAAYYVGY	surface_glycoprotein_S1_254-260	12	HLA-DQA10503-DQB10316	0.821014	0.16	Strong binder
SSGWTAGAAAYYVGY	surface_glycoprotein_S1_254-260	12	HLA-DQA10503-DQB10319	0.821014	0.16	Strong binder
SSGWTAGAAAYYVGY	surface_glycoprotein_S1_254-260	12	HLA-DQA10503-DQB10321	0.821014	0.16	Strong binder
SSGWTAGAAAYYVGY	surface_glycoprotein_S1_254-260	12	HLA-DQA10503-DQB10322	0.821014	0.16	Strong binder
SSGWTAGAAAYYVGY	surface_glycoprotein_S1_254-260	12	HLA-DQA10503-DQB10324	0.821014	0.16	Strong binder
SSGWTAGAAAYYVGY	surface_glycoprotein_S1_254-260	12	HLA-DQA10503-DQB10327	0.821014	0.16	Strong binder
SSGWTAGAAAYYVGY	surface_glycoprotein_S1_254-260	12	HLA-DQA10503-DQB10329	0.821014	0.16	Strong binder
SSGWTAGAAAYYVGY	surface_glycoprotein_S1_254-260	12	HLA-DQA10503-DQB10335	0.821014	0.16	Strong binder
SSGWTAGAAAYYVGY	surface_glycoprotein_S1_254-260	12	HLA-DQA10503-DQB10336	0.821014	0.16	Strong binder
SSSGWTAGAAAYYVG	surface_glycoprotein_S1_254-260	11	HLA-DQA10503-DQB10601	0.507373	0.16	Strong binder
SSSGWTAGAAAYYVG	surface_glycoprotein_S1_254-260	11	HLA-DQA10503-DQB10635	0.507373	0.16	Strong binder
SSSGWTAGAAAYYVG	surface_glycoprotein_S1_254-260	11	HLA-DQA10503-DQB10643	0.507373	0.16	Strong binder
SSGWTAGAAAYYVGY	surface_glycoprotein_S1_254-260	12	HLA-DQA10504-DQB10301	0.821014	0.16	Strong binder
SSGWTAGAAAYYVGY	surface_glycoprotein_S1_254-260	12	HLA-DQA10504-DQB10309	0.821014	0.16	Strong binder
SSGWTAGAAAYYVGY	surface_glycoprotein_S1_254-260	12	HLA-DQA10504-DQB10310	0.821014	0.16	Strong binder
SSGWTAGAAAYYVGY	surface_glycoprotein_S1_254-260	12	HLA-DQA10504-DQB10316	0.821014	0.16	Strong binder
SSGWTAGAAAYYVGY	surface_glycoprotein_S1_254-260	12	HLA-DQA10504-DQB10319	0.821014	0.16	Strong binder
SSGWTAGAAAYYVGY	surface_glycoprotein_S1_254-260	12	HLA-DQA10504-DQB10321	0.821014	0.16	Strong binder
SSGWTAGAAAYYVGY	surface_glycoprotein_S1_254-260	12	HLA-DQA10504-DQB10322	0.821014	0.16	Strong binder
SSGWTAGAAAYYVGY	surface_glycoprotein_S1_254-260	12	HLA-DQA10504-DQB10324	0.821014	0.16	Strong binder
SSGWTAGAAAYYVGY	surface_glycoprotein_S1_254-260	12	HLA-DQA10504-DQB10327	0.821014	0.16	Strong binder
SSGWTAGAAAYYVGY	surface_glycoprotein_S1_254-260	12	HLA-DQA10504-DQB10329	0.821014	0.16	Strong binder
SSGWTAGAAAYYVGY	surface_glycoprotein_S1_254-260	12	HLA-DQA10504-DQB10335	0.821014	0.16	Strong binder
SSGWTAGAAAYYVGY	surface_glycoprotein_S1_254-260	12	HLA-DQA10504-DQB10336	0.821014	0.16	Strong binder
SSSGWTAGAAAYYVG	surface_glycoprotein_S1_254-260	11	HLA-DQA10504-DQB10601	0.507373	0.16	Strong binder
SSSGWTAGAAAYYVG	surface_glycoprotein_S1_254-260	11	HLA-DQA10504-DQB10635	0.507373	0.16	Strong binder
SSSGWTAGAAAYYVG	surface_glycoprotein_S1_254-260	11	HLA-DQA10504-DQB10643	0.507373	0.16	Strong binder
SSGWTAGAAAYYVGY	surface_glycoprotein_S1_254-260	12	HLA-DQA10505-DQB10301	0.821014	0.16	Strong binder
SSGWTAGAAAYYVGY	surface_glycoprotein_S1_254-260	12	HLA-DQA10505-DQB10309	0.821014	0.16	Strong binder
SSGWTAGAAAYYVGY	surface_glycoprotein_S1_254-260	12	HLA-DQA10505-DQB10310	0.821014	0.16	Strong binder
SSGWTAGAAAYYVGY	surface_glycoprotein_S1_254-260	12	HLA-DQA10505-DQB10316	0.821014	0.16	Strong binder
SSGWTAGAAAYYVGY	surface_glycoprotein_S1_254-260	12	HLA-DQA10505-DQB10319	0.821014	0.16	Strong binder
SSGWTAGAAAYYVGY	surface_glycoprotein_S1_254-260	12	HLA-DQA10505-DQB10321	0.821014	0.16	Strong binder
SSGWTAGAAAYYVGY	surface_glycoprotein_S1_254-260	12	HLA-DQA10505-DQB10322	0.821014	0.16	Strong binder
SSGWTAGAAAYYVGY	surface_glycoprotein_S1_254-260	12	HLA-DQA10505-DQB10324	0.821014	0.16	Strong binder
SSGWTAGAAAYYVGY	surface_glycoprotein_S1_254-260	12	HLA-DQA10505-DQB10327	0.821014	0.16	Strong binder
SSGWTAGAAAYYVGY	surface_glycoprotein_S1_254-260	12	HLA-DQA10505-DQB10329	0.821014	0.16	Strong binder
SSGWTAGAAAYYVGY	surface_glycoprotein_S1_254-260	12	HLA-DQA10505-DQB10335	0.821014	0.16	Strong binder
SSGWTAGAAAYYVGY	surface_glycoprotein_S1_254-260	12	HLA-DQA10505-DQB10336	0.821014	0.16	Strong binder
SSSGWTAGAAAYYVG	surface_glycoprotein_S1_254-260	11	HLA-DQA10505-DQB10601	0.507373	0.16	Strong binder
SSSGWTAGAAAYYVG	surface_glycoprotein_S1_254-260	11	HLA-DQA10505-DQB10635	0.507373	0.16	Strong binder
SSSGWTAGAAAYYVG	surface_glycoprotein_S1_254-260	11	HLA-DQA10505-DQB10643	0.507373	0.16	Strong binder
SSGWTAGAAAYYVGY	surface_glycoprotein_S1_254-260	12	HLA-DQA10506-DQB10301	0.821014	0.16	Strong binder
SSGWTAGAAAYYVGY	surface_glycoprotein_S1_254-260	12	HLA-DQA10506-DQB10309	0.821014	0.16	Strong binder
SSGWTAGAAAYYVGY	surface_glycoprotein_S1_254-260	12	HLA-DQA10506-DQB10310	0.821014	0.16	Strong binder
SSGWTAGAAAYYVGY	surface_glycoprotein_S1_254-260	12	HLA-DQA10506-DQB10316	0.821014	0.16	Strong binder
SSGWTAGAAAYYVGY	surface_glycoprotein_S1_254-260	12	HLA-DQA10506-DQB10319	0.821014	0.16	Strong binder
SSGWTAGAAAYYVGY	surface_glycoprotein_S1_254-260	12	HLA-DQA10506-DQB10321	0.821014	0.16	Strong binder
SSGWTAGAAAYYVGY	surface_glycoprotein_S1_254-260	12	HLA-DQA10506-DQB10322	0.821014	0.16	Strong binder
SSGWTAGAAAYYVGY	surface_glycoprotein_S1_254-260	12	HLA-DQA10506-DQB10324	0.821014	0.16	Strong binder
SSGWTAGAAAYYVGY	surface_glycoprotein_S1_254-260	12	HLA-DQA10506-DQB10327	0.821014	0.16	Strong binder
SSGWTAGAAAYYVGY	surface_glycoprotein_S1_254-260	12	HLA-DQA10506-DQB10329	0.821014	0.16	Strong binder
SSGWTAGAAAYYVGY	surface_glycoprotein_S1_254-260	12	HLA-DQA10506-DQB10335	0.821014	0.16	Strong binder
SSGWTAGAAAYYVGY	surface_glycoprotein_S1_254-260	12	HLA-DQA10506-DQB10336	0.821014	0.16	Strong binder
SSSGWTAGAAAYYVG	surface_glycoprotein_S1_254-260	11	HLA-DQA10506-DQB10601	0.507373	0.16	Strong binder
SSSGWTAGAAAYYVG	surface_glycoprotein_S1_254-260	11	HLA-DQA10506-DQB10635	0.507373	0.16	Strong binder
SSSGWTAGAAAYYVG	surface_glycoprotein_S1_254-260	11	HLA-DQA10506-DQB10643	0.507373	0.16	Strong binder
SSGWTAGAAAYYVGY	surface_glycoprotein_S1_254-260	12	HLA-DQA10507-DQB10301	0.821014	0.16	Strong binder
SSGWTAGAAAYYVGY	surface_glycoprotein_S1_254-260	12	HLA-DQA10507-DQB10309	0.821014	0.16	Strong binder
SSGWTAGAAAYYVGY	surface_glycoprotein_S1_254-260	12	HLA-DQA10507-DQB10310	0.821014	0.16	Strong binder
SSGWTAGAAAYYVGY	surface_glycoprotein_S1_254-260	12	HLA-DQA10507-DQB10316	0.821014	0.16	Strong binder
SSGWTAGAAAYYVGY	surface_glycoprotein_S1_254-260	12	HLA-DQA10507-DQB10319	0.821014	0.16	Strong binder
SSGWTAGAAAYYVGY	surface_glycoprotein_S1_254-260	12	HLA-DQA10507-DQB10321	0.821014	0.16	Strong binder
SSGWTAGAAAYYVGY	surface_glycoprotein_S1_254-260	12	HLA-DQA10507-DQB10322	0.821014	0.16	Strong binder
SSGWTAGAAAYYVGY	surface_glycoprotein_S1_254-260	12	HLA-DQA10507-DQB10324	0.821014	0.16	Strong binder
SSGWTAGAAAYYVGY	surface_glycoprotein_S1_254-260	12	HLA-DQA10507-DQB10327	0.821014	0.16	Strong binder
SSGWTAGAAAYYVGY	surface_glycoprotein_S1_254-260	12	HLA-DQA10507-DQB10329	0.821014	0.16	Strong binder
SSGWTAGAAAYYVGY	surface_glycoprotein_S1_254-260	12	HLA-DQA10507-DQB10335	0.821014	0.16	Strong binder
SSGWTAGAAAYYVGY	surface_glycoprotein_S1_254-260	12	HLA-DQA10507-DQB10336	0.821014	0.16	Strong binder
SSSGWTAGAAAYYVG	surface_glycoprotein_S1_254-260	11	HLA-DQA10507-DQB10601	0.507373	0.16	Strong binder
SSSGWTAGAAAYYVG	surface_glycoprotein_S1_254-260	11	HLA-DQA10507-DQB10635	0.507373	0.16	Strong binder
SSSGWTAGAAAYYVG	surface_glycoprotein_S1_254-260	11	HLA-DQA10507-DQB10643	0.507373	0.16	Strong binder
SSGWTAGAAAYYVGY	surface_glycoprotein_S1_254-260	12	HLA-DQA10508-DQB10301	0.821014	0.16	Strong binder
SSGWTAGAAAYYVGY	surface_glycoprotein_S1_254-260	12	HLA-DQA10508-DQB10309	0.821014	0.16	Strong binder
SSGWTAGAAAYYVGY	surface_glycoprotein_S1_254-260	12	HLA-DQA10508-DQB10310	0.821014	0.16	Strong binder
SSGWTAGAAAYYVGY	surface_glycoprotein_S1_254-260	12	HLA-DQA10508-DQB10316	0.821014	0.16	Strong binder
SSGWTAGAAAYYVGY	surface_glycoprotein_S1_254-260	12	HLA-DQA10508-DQB10319	0.821014	0.16	Strong binder
SSGWTAGAAAYYVGY	surface_glycoprotein_S1_254-260	12	HLA-DQA10508-DQB10321	0.821014	0.16	Strong binder
SSGWTAGAAAYYVGY	surface_glycoprotein_S1_254-260	12	HLA-DQA10508-DQB10322	0.821014	0.16	Strong binder
SSGWTAGAAAYYVGY	surface_glycoprotein_S1_254-260	12	HLA-DQA10508-DQB10324	0.821014	0.16	Strong binder
SSGWTAGAAAYYVGY	surface_glycoprotein_S1_254-260	12	HLA-DQA10508-DQB10327	0.821014	0.16	Strong binder
SSGWTAGAAAYYVGY	surface_glycoprotein_S1_254-260	12	HLA-DQA10508-DQB10329	0.821014	0.16	Strong binder
SSGWTAGAAAYYVGY	surface_glycoprotein_S1_254-260	12	HLA-DQA10508-DQB10335	0.821014	0.16	Strong binder
SSGWTAGAAAYYVGY	surface_glycoprotein_S1_254-260	12	HLA-DQA10508-DQB10336	0.821014	0.16	Strong binder
SSSGWTAGAAAYYVG	surface_glycoprotein_S1_254-260	11	HLA-DQA10508-DQB10601	0.507373	0.16	Strong binder
SSSGWTAGAAAYYVG	surface_glycoprotein_S1_254-260	11	HLA-DQA10508-DQB10635	0.507373	0.16	Strong binder
SSSGWTAGAAAYYVG	surface_glycoprotein_S1_254-260	11	HLA-DQA10508-DQB10643	0.507373	0.16	Strong binder
SSGWTAGAAAYYVGY	surface_glycoprotein_S1_254-260	12	HLA-DQA10509-DQB10301	0.821014	0.16	Strong binder
SSGWTAGAAAYYVGY	surface_glycoprotein_S1_254-260	12	HLA-DQA10509-DQB10309	0.821014	0.16	Strong binder
SSGWTAGAAAYYVGY	surface_glycoprotein_S1_254-260	12	HLA-DQA10509-DQB10310	0.821014	0.16	Strong binder
SSGWTAGAAAYYVGY	surface_glycoprotein_S1_254-260	12	HLA-DQA10509-DQB10316	0.821014	0.16	Strong binder
SSGWTAGAAAYYVGY	surface_glycoprotein_S1_254-260	12	HLA-DQA10509-DQB10319	0.821014	0.16	Strong binder
SSGWTAGAAAYYVGY	surface_glycoprotein_S1_254-260	12	HLA-DQA10509-DQB10321	0.821014	0.16	Strong binder
SSGWTAGAAAYYVGY	surface_glycoprotein_S1_254-260	12	HLA-DQA10509-DQB10322	0.821014	0.16	Strong binder
SSGWTAGAAAYYVGY	surface_glycoprotein_S1_254-260	12	HLA-DQA10509-DQB10324	0.821014	0.16	Strong binder
SSGWTAGAAAYYVGY	surface_glycoprotein_S1_254-260	12	HLA-DQA10509-DQB10327	0.821014	0.16	Strong binder
SSGWTAGAAAYYVGY	surface_glycoprotein_S1_254-260	12	HLA-DQA10509-DQB10329	0.821014	0.16	Strong binder
SSGWTAGAAAYYVGY	surface_glycoprotein_S1_254-260	12	HLA-DQA10509-DQB10335	0.821014	0.16	Strong binder
SSGWTAGAAAYYVGY	surface_glycoprotein_S1_254-260	12	HLA-DQA10509-DQB10336	0.821014	0.16	Strong binder
SSSGWTAGAAAYYVG	surface_glycoprotein_S1_254-260	11	HLA-DQA10509-DQB10601	0.507373	0.16	Strong binder
SSSGWTAGAAAYYVG	surface_glycoprotein_S1_254-260	11	HLA-DQA10509-DQB10635	0.507373	0.16	Strong binder
SSSGWTAGAAAYYVG	surface_glycoprotein_S1_254-260	11	HLA-DQA10509-DQB10643	0.507373	0.16	Strong binder
SSGWTAGAAAYYVGY	surface_glycoprotein_S1_254-260	12	HLA-DQA10510-DQB10301	0.821014	0.16	Strong binder
SSGWTAGAAAYYVGY	surface_glycoprotein_S1_254-260	12	HLA-DQA10510-DQB10309	0.821014	0.16	Strong binder
SSGWTAGAAAYYVGY	surface_glycoprotein_S1_254-260	12	HLA-DQA10510-DQB10310	0.821014	0.16	Strong binder
SSGWTAGAAAYYVGY	surface_glycoprotein_S1_254-260	12	HLA-DQA10510-DQB10316	0.821014	0.16	Strong binder
SSGWTAGAAAYYVGY	surface_glycoprotein_S1_254-260	12	HLA-DQA10510-DQB10319	0.821014	0.16	Strong binder
SSGWTAGAAAYYVGY	surface_glycoprotein_S1_254-260	12	HLA-DQA10510-DQB10321	0.821014	0.16	Strong binder
SSGWTAGAAAYYVGY	surface_glycoprotein_S1_254-260	12	HLA-DQA10510-DQB10322	0.821014	0.16	Strong binder
SSGWTAGAAAYYVGY	surface_glycoprotein_S1_254-260	12	HLA-DQA10510-DQB10324	0.821014	0.16	Strong binder
SSGWTAGAAAYYVGY	surface_glycoprotein_S1_254-260	12	HLA-DQA10510-DQB10327	0.821014	0.16	Strong binder
SSGWTAGAAAYYVGY	surface_glycoprotein_S1_254-260	12	HLA-DQA10510-DQB10329	0.821014	0.16	Strong binder
SSGWTAGAAAYYVGY	surface_glycoprotein_S1_254-260	12	HLA-DQA10510-DQB10335	0.821014	0.16	Strong binder
SSGWTAGAAAYYVGY	surface_glycoprotein_S1_254-260	12	HLA-DQA10510-DQB10336	0.821014	0.16	Strong binder
SSSGWTAGAAAYYVG	surface_glycoprotein_S1_254-260	11	HLA-DQA10510-DQB10601	0.507373	0.16	Strong binder
SSSGWTAGAAAYYVG	surface_glycoprotein_S1_254-260	11	HLA-DQA10510-DQB10635	0.507373	0.16	Strong binder
SSSGWTAGAAAYYVG	surface_glycoprotein_S1_254-260	11	HLA-DQA10510-DQB10643	0.507373	0.16	Strong binder
SSGWTAGAAAYYVGY	surface_glycoprotein_S1_254-260	12	HLA-DQA10511-DQB10301	0.821014	0.16	Strong binder
SSGWTAGAAAYYVGY	surface_glycoprotein_S1_254-260	12	HLA-DQA10511-DQB10309	0.821014	0.16	Strong binder
SSGWTAGAAAYYVGY	surface_glycoprotein_S1_254-260	12	HLA-DQA10511-DQB10310	0.821014	0.16	Strong binder
SSGWTAGAAAYYVGY	surface_glycoprotein_S1_254-260	12	HLA-DQA10511-DQB10316	0.821014	0.16	Strong binder
SSGWTAGAAAYYVGY	surface_glycoprotein_S1_254-260	12	HLA-DQA10511-DQB10319	0.821014	0.16	Strong binder
SSGWTAGAAAYYVGY	surface_glycoprotein_S1_254-260	12	HLA-DQA10511-DQB10321	0.821014	0.16	Strong binder
SSGWTAGAAAYYVGY	surface_glycoprotein_S1_254-260	12	HLA-DQA10511-DQB10322	0.821014	0.16	Strong binder
SSGWTAGAAAYYVGY	surface_glycoprotein_S1_254-260	12	HLA-DQA10511-DQB10324	0.821014	0.16	Strong binder
SSGWTAGAAAYYVGY	surface_glycoprotein_S1_254-260	12	HLA-DQA10511-DQB10327	0.821014	0.16	Strong binder
SSGWTAGAAAYYVGY	surface_glycoprotein_S1_254-260	12	HLA-DQA10511-DQB10329	0.821014	0.16	Strong binder
SSGWTAGAAAYYVGY	surface_glycoprotein_S1_254-260	12	HLA-DQA10511-DQB10335	0.821014	0.16	Strong binder
SSGWTAGAAAYYVGY	surface_glycoprotein_S1_254-260	12	HLA-DQA10511-DQB10336	0.821014	0.16	Strong binder
SSSGWTAGAAAYYVG	surface_glycoprotein_S1_254-260	11	HLA-DQA10511-DQB10601	0.507373	0.16	Strong binder
SSSGWTAGAAAYYVG	surface_glycoprotein_S1_254-260	11	HLA-DQA10511-DQB10635	0.507373	0.16	Strong binder
SSSGWTAGAAAYYVG	surface_glycoprotein_S1_254-260	11	HLA-DQA10511-DQB10643	0.507373	0.16	Strong binder
RRARSVASQSIIAYT	surface_glycoprotein_S1-S2_682-689	11	HLA-DPA10103-DPB10601	0.215032	0.17	Strong binder
NSPRRARSVASQSII	surface_glycoprotein_S1-S2_682-689	8	HLA-DPA10103-DPB113101	0.75919	0.17	Strong binder
NSPRRARSVASQSII	surface_glycoprotein_S1-S2_682-689	8	HLA-DPA10103-DPB11701	0.75919	0.17	Strong binder
SPRRARSVASQSIIA	surface_glycoprotein_S1-S2_682-689	9	HLA-DPA10103-DPB12901	0.689037	0.17	Strong binder
SPRRARSVASQSIIA	surface_glycoprotein_S1-S2_682-689	9	HLA-DPA10103-DPB14401	0.689037	0.17	Strong binder
NSPRRARSVASQSII	surface_glycoprotein_S1-S2_682-689	8	HLA-DPA10103-DPB19301	0.75919	0.17	Strong binder
TNSPRRARSVASQSI	surface_glycoprotein_S1-S2_682-689	7	HLA-DPA10104-DPB10601	0.797872	0.17	Strong binder
NSPRRARSVASQSII	surface_glycoprotein_S1-S2_682-689	8	HLA-DPA10104-DPB113101	0.75919	0.17	Strong binder
NSPRRARSVASQSII	surface_glycoprotein_S1-S2_682-689	8	HLA-DPA10104-DPB11701	0.75919	0.17	Strong binder
SPRRARSVASQSIIA	surface_glycoprotein_S1-S2_682-689	9	HLA-DPA10104-DPB12901	0.689037	0.17	Strong binder
SPRRARSVASQSIIA	surface_glycoprotein_S1-S2_682-689	9	HLA-DPA10104-DPB14401	0.689037	0.17	Strong binder
NSPRRARSVASQSII	surface_glycoprotein_S1-S2_682-689	8	HLA-DPA10104-DPB19301	0.75919	0.17	Strong binder
TNSPRRARSVASQSI	surface_glycoprotein_S1-S2_682-689	7	HLA-DPA10105-DPB10601	0.797872	0.17	Strong binder
NSPRRARSVASQSII	surface_glycoprotein_S1-S2_682-689	8	HLA-DPA10105-DPB113101	0.75919	0.17	Strong binder
NSPRRARSVASQSII	surface_glycoprotein_S1-S2_682-689	8	HLA-DPA10105-DPB11701	0.75919	0.17	Strong binder
SPRRARSVASQSIIA	surface_glycoprotein_S1-S2_682-689	9	HLA-DPA10105-DPB12901	0.689037	0.17	Strong binder
SPRRARSVASQSIIA	surface_glycoprotein_S1-S2_682-689	9	HLA-DPA10105-DPB14401	0.689037	0.17	Strong binder
NSPRRARSVASQSII	surface_glycoprotein_S1-S2_682-689	8	HLA-DPA10105-DPB19301	0.75919	0.17	Strong binder
TNSPRRARSVASQSI	surface_glycoprotein_S1-S2_682-689	7	HLA-DPA10107-DPB10601	0.797872	0.17	Strong binder
NSPRRARSVASQSII	surface_glycoprotein_S1-S2_682-689	8	HLA-DPA10107-DPB113101	0.75919	0.17	Strong binder
NSPRRARSVASQSII	surface_glycoprotein_S1-S2_682-689	8	HLA-DPA10107-DPB11701	0.75919	0.17	Strong binder
SPRRARSVASQSIIA	surface_glycoprotein_S1-S2_682-689	9	HLA-DPA10107-DPB12901	0.689037	0.17	Strong binder
SPRRARSVASQSIIA	surface_glycoprotein_S1-S2_682-689	9	HLA-DPA10107-DPB14401	0.689037	0.17	Strong binder
NSPRRARSVASQSII	surface_glycoprotein_S1-S2_682-689	8	HLA-DPA10107-DPB19301	0.75919	0.17	Strong binder
TNSPRRARSVASQSI	surface_glycoprotein_S1-S2_682-689	7	HLA-DPA10108-DPB10601	0.797872	0.17	Strong binder
NSPRRARSVASQSII	surface_glycoprotein_S1-S2_682-689	8	HLA-DPA10108-DPB113101	0.75919	0.17	Strong binder
NSPRRARSVASQSII	surface_glycoprotein_S1-S2_682-689	8	HLA-DPA10108-DPB11701	0.75919	0.17	Strong binder
SPRRARSVASQSIIA	surface_glycoprotein_S1-S2_682-689	9	HLA-DPA10108-DPB12901	0.689037	0.17	Strong binder
SPRRARSVASQSIIA	surface_glycoprotein_S1-S2_682-689	9	HLA-DPA10108-DPB14401	0.689037	0.17	Strong binder
NSPRRARSVASQSII	surface_glycoprotein_S1-S2_682-689	8	HLA-DPA10108-DPB19301	0.75919	0.17	Strong binder
TNSPRRARSVASQSI	surface_glycoprotein_S1-S2_682-689	7	HLA-DPA10109-DPB10601	0.797872	0.17	Strong binder
NSPRRARSVASQSII	surface_glycoprotein_S1-S2_682-689	8	HLA-DPA10109-DPB113101	0.75919	0.17	Strong binder
NSPRRARSVASQSII	surface_glycoprotein_S1-S2_682-689	8	HLA-DPA10109-DPB11701	0.75919	0.17	Strong binder
SPRRARSVASQSIIA	surface_glycoprotein_S1-S2_682-689	9	HLA-DPA10109-DPB12901	0.689037	0.17	Strong binder
SPRRARSVASQSIIA	surface_glycoprotein_S1-S2_682-689	9	HLA-DPA10109-DPB14401	0.689037	0.17	Strong binder
NSPRRARSVASQSII	surface_glycoprotein_S1-S2_682-689	8	HLA-DPA10109-DPB19301	0.75919	0.17	Strong binder
TNSPRRARSVASQSI	surface_glycoprotein_S1-S2_682-689	7	HLA-DPA10110-DPB10601	0.797872	0.17	Strong binder
NSPRRARSVASQSII	surface_glycoprotein_S1-S2_682-689	8	HLA-DPA10110-DPB113101	0.75919	0.17	Strong binder
NSPRRARSVASQSII	surface_glycoprotein_S1-S2_682-689	8	HLA-DPA10110-DPB11701	0.75919	0.17	Strong binder
SPRRARSVASQSIIA	surface_glycoprotein_S1-S2_682-689	9	HLA-DPA10110-DPB12901	0.689037	0.17	Strong binder
SPRRARSVASQSIIA	surface_glycoprotein_S1-S2_682-689	9	HLA-DPA10110-DPB14401	0.689037	0.17	Strong binder
NSPRRARSVASQSII	surface_glycoprotein_S1-S2_682-689	8	HLA-DPA10110-DPB19301	0.75919	0.17	Strong binder
TNSPRRARSVASQSI	surface_glycoprotein_S1-S2_682-689	7	HLA-DPA10203-DPB10601	0.797872	0.17	Strong binder
NSPRRARSVASQSII	surface_glycoprotein_S1-S2_682-689	8	HLA-DPA10203-DPB113101	0.75919	0.17	Strong binder
NSPRRARSVASQSII	surface_glycoprotein_S1-S2_682-689	8	HLA-DPA10203-DPB11701	0.75919	0.17	Strong binder
SPRRARSVASQSIIA	surface_glycoprotein_S1-S2_682-689	9	HLA-DPA10203-DPB12901	0.689037	0.17	Strong binder
SPRRARSVASQSIIA	surface_glycoprotein_S1-S2_682-689	9	HLA-DPA10203-DPB14401	0.689037	0.17	Strong binder
NSPRRARSVASQSII	surface_glycoprotein_S1-S2_682-689	8	HLA-DPA10203-DPB19301	0.75919	0.17	Strong binder
NSPRRARSVASQSII	surface_glycoprotein_S1-S2_682-689	8	HLA-DPA10302-DPB113101	0.664146	0.17	Strong binder
TNSPRRARSVASQSI	surface_glycoprotein_S1-S2_682-689	7	HLA-DPA10302-DPB11401	0.696041	0.17	Strong binder
NSPRRARSVASQSII	surface_glycoprotein_S1-S2_682-689	8	HLA-DPA10302-DPB11701	0.664146	0.17	Strong binder
NSPRRARSVASQSII	surface_glycoprotein_S1-S2_682-689	8	HLA-DPA10302-DPB19301	0.664146	0.17	Strong binder
NSPRRARSVASQSII	surface_glycoprotein_S1-S2_682-689	8	HLA-DPA10401-DPB10301	0.759261	0.17	Strong binder
NSPRRARSVASQSII	surface_glycoprotein_S1-S2_682-689	8	HLA-DPA10401-DPB110401	0.759261	0.17	Strong binder
NSPRRARSVASQSII	surface_glycoprotein_S1-S2_682-689	8	HLA-DPA10401-DPB111101	0.759261	0.17	Strong binder
NSPRRARSVASQSII	surface_glycoprotein_S1-S2_682-689	8	HLA-DPA10401-DPB112401	0.759261	0.17	Strong binder
NSPRRARSVASQSII	surface_glycoprotein_S1-S2_682-689	8	HLA-DPA10401-DPB113001	0.785006	0.17	Strong binder
SPRRARSVASQSIIA	surface_glycoprotein_S1-S2_682-689	9	HLA-DPA10401-DPB113101	0.724954	0.17	Strong binder
SPRRARSVASQSIIA	surface_glycoprotein_S1-S2_682-689	9	HLA-DPA10401-DPB11701	0.724954	0.17	Strong binder
NSPRRARSVASQSII	surface_glycoprotein_S1-S2_682-689	8	HLA-DPA10401-DPB12001	0.785006	0.17	Strong binder
NSPRRARSVASQSII	surface_glycoprotein_S1-S2_682-689	8	HLA-DPA10401-DPB12101	0.66375	0.17	Strong binder
NSPRRARSVASQSII	surface_glycoprotein_S1-S2_682-689	8	HLA-DPA10401-DPB12501	0.759261	0.17	Strong binder
NSPRRARSVASQSII	surface_glycoprotein_S1-S2_682-689	8	HLA-DPA10401-DPB13001	0.66375	0.17	Strong binder
NSPRRARSVASQSII	surface_glycoprotein_S1-S2_682-689	8	HLA-DPA10401-DPB14501	0.759261	0.17	Strong binder
NSPRRARSVASQSII	surface_glycoprotein_S1-S2_682-689	8	HLA-DPA10401-DPB17001	0.759261	0.17	Strong binder
NSPRRARSVASQSII	surface_glycoprotein_S1-S2_682-689	8	HLA-DPA10401-DPB17601	0.759261	0.17	Strong binder
NSPRRARSVASQSII	surface_glycoprotein_S1-S2_682-689	8	HLA-DPA10401-DPB17801	0.759261	0.17	Strong binder
NSPRRARSVASQSII	surface_glycoprotein_S1-S2_682-689	8	HLA-DPA10401-DPB19101	0.785006	0.17	Strong binder
NSPRRARSVASQSII	surface_glycoprotein_S1-S2_682-689	8	HLA-DPA10401-DPB19201	0.759261	0.17	Strong binder
SPRRARSVASQSIIA	surface_glycoprotein_S1-S2_682-689	9	HLA-DPA10401-DPB19301	0.724954	0.17	Strong binder
RNPANNAAIVLQLPQ	N_protein_158-164	2	HLA-DQA10101-DQB10629	0.126919	0.17	Strong binder
PANNAAIVLQLPQGT	N_protein_158-164	4	HLA-DQA10102-DQB10629	0.36864	0.17	Strong binder
PANNAAIVLQLPQGT	N_protein_158-164	4	HLA-DQA10102-DQB10637	0.572416	0.17	Strong binder
PANNAAIVLQLPQGT	N_protein_158-164	4	HLA-DQA10103-DQB10615	0.542609	0.17	Strong binder
RNPANNAAIVLQLPQ	N_protein_158-164	2	HLA-DQA10104-DQB10629	0.126919	0.17	Strong binder
RNPANNAAIVLQLPQ	N_protein_158-164	2	HLA-DQA10105-DQB10629	0.126919	0.17	Strong binder
PANNAAIVLQLPQGT	N_protein_158-164	4	HLA-DQA10106-DQB10629	0.36864	0.17	Strong binder
PANNAAIVLQLPQGT	N_protein_158-164	4	HLA-DQA10106-DQB10637	0.572416	0.17	Strong binder
RNPANNAAIVLQLPQ	N_protein_158-164	2	HLA-DQA10107-DQB10629	0.126919	0.17	Strong binder
PANNAAIVLQLPQGT	N_protein_158-164	4	HLA-DQA10108-DQB10629	0.36864	0.17	Strong binder
PANNAAIVLQLPQGT	N_protein_158-164	4	HLA-DQA10108-DQB10637	0.572416	0.17	Strong binder
PANNAAIVLQLPQGT	N_protein_158-164	4	HLA-DQA10109-DQB10629	0.36864	0.17	Strong binder
PANNAAIVLQLPQGT	N_protein_158-164	4	HLA-DQA10109-DQB10637	0.572416	0.17	Strong binder
SSGWTAGAAAYYVGY	surface_glycoprotein_S1_254-260	12	HLA-DQA10201-DQB10301	0.819672	0.17	Strong binder
SSGWTAGAAAYYVGY	surface_glycoprotein_S1_254-260	12	HLA-DQA10201-DQB10309	0.819672	0.17	Strong binder
SSGWTAGAAAYYVGY	surface_glycoprotein_S1_254-260	12	HLA-DQA10201-DQB10310	0.819672	0.17	Strong binder
SSGWTAGAAAYYVGY	surface_glycoprotein_S1_254-260	12	HLA-DQA10201-DQB10316	0.819672	0.17	Strong binder
SSGWTAGAAAYYVGY	surface_glycoprotein_S1_254-260	12	HLA-DQA10201-DQB10319	0.819672	0.17	Strong binder
SSGWTAGAAAYYVGY	surface_glycoprotein_S1_254-260	12	HLA-DQA10201-DQB10321	0.819672	0.17	Strong binder
SSGWTAGAAAYYVGY	surface_glycoprotein_S1_254-260	12	HLA-DQA10201-DQB10322	0.819672	0.17	Strong binder
SSGWTAGAAAYYVGY	surface_glycoprotein_S1_254-260	12	HLA-DQA10201-DQB10324	0.819672	0.17	Strong binder
SSGWTAGAAAYYVGY	surface_glycoprotein_S1_254-260	12	HLA-DQA10201-DQB10327	0.819672	0.17	Strong binder
SSGWTAGAAAYYVGY	surface_glycoprotein_S1_254-260	12	HLA-DQA10201-DQB10329	0.819672	0.17	Strong binder
SSGWTAGAAAYYVGY	surface_glycoprotein_S1_254-260	12	HLA-DQA10201-DQB10335	0.819672	0.17	Strong binder
SSGWTAGAAAYYVGY	surface_glycoprotein_S1_254-260	12	HLA-DQA10201-DQB10336	0.819672	0.17	Strong binder
SSGWTAGAAAYYVGY	surface_glycoprotein_S1_254-260	12	HLA-DQA10201-DQB10618	0.218009	0.17	Strong binder
SSSGWTAGAAAYYVG	surface_glycoprotein_S1_254-260	11	HLA-DQA10401-DQB10313	0.636214	0.17	Strong binder
SSGWTAGAAAYYVGY	surface_glycoprotein_S1_254-260	12	HLA-DQA10401-DQB10618	0.230707	0.17	Strong binder
SSGWTAGAAAYYVGY	surface_glycoprotein_S1_254-260	12	HLA-DQA10401-DQB10642	0.18285	0.17	Strong binder
SSSGWTAGAAAYYVG	surface_glycoprotein_S1_254-260	11	HLA-DQA10402-DQB10313	0.636214	0.17	Strong binder
SSGWTAGAAAYYVGY	surface_glycoprotein_S1_254-260	12	HLA-DQA10402-DQB10618	0.230707	0.17	Strong binder
SSGWTAGAAAYYVGY	surface_glycoprotein_S1_254-260	12	HLA-DQA10402-DQB10642	0.18285	0.17	Strong binder
SSSGWTAGAAAYYVG	surface_glycoprotein_S1_254-260	11	HLA-DQA10404-DQB10313	0.636214	0.17	Strong binder
SSGWTAGAAAYYVGY	surface_glycoprotein_S1_254-260	12	HLA-DQA10404-DQB10618	0.230707	0.17	Strong binder
SSGWTAGAAAYYVGY	surface_glycoprotein_S1_254-260	12	HLA-DQA10404-DQB10642	0.18285	0.17	Strong binder
SSSGWTAGAAAYYVG	surface_glycoprotein_S1_254-260	11	HLA-DQA10601-DQB10301	0.679456	0.17	Strong binder
SSSGWTAGAAAYYVG	surface_glycoprotein_S1_254-260	11	HLA-DQA10601-DQB10309	0.679456	0.17	Strong binder
SSSGWTAGAAAYYVG	surface_glycoprotein_S1_254-260	11	HLA-DQA10601-DQB10310	0.679456	0.17	Strong binder
SSSGWTAGAAAYYVG	surface_glycoprotein_S1_254-260	11	HLA-DQA10601-DQB10316	0.679456	0.17	Strong binder
SSSGWTAGAAAYYVG	surface_glycoprotein_S1_254-260	11	HLA-DQA10601-DQB10319	0.679456	0.17	Strong binder
SSSGWTAGAAAYYVG	surface_glycoprotein_S1_254-260	11	HLA-DQA10601-DQB10321	0.679456	0.17	Strong binder
SSSGWTAGAAAYYVG	surface_glycoprotein_S1_254-260	11	HLA-DQA10601-DQB10322	0.679456	0.17	Strong binder
SSSGWTAGAAAYYVG	surface_glycoprotein_S1_254-260	11	HLA-DQA10601-DQB10324	0.679456	0.17	Strong binder
SSSGWTAGAAAYYVG	surface_glycoprotein_S1_254-260	11	HLA-DQA10601-DQB10327	0.679456	0.17	Strong binder
SSSGWTAGAAAYYVG	surface_glycoprotein_S1_254-260	11	HLA-DQA10601-DQB10328	0.699427	0.17	Strong binder
SSSGWTAGAAAYYVG	surface_glycoprotein_S1_254-260	11	HLA-DQA10601-DQB10329	0.679456	0.17	Strong binder
SSSGWTAGAAAYYVG	surface_glycoprotein_S1_254-260	11	HLA-DQA10601-DQB10335	0.679456	0.17	Strong binder
SSSGWTAGAAAYYVG	surface_glycoprotein_S1_254-260	11	HLA-DQA10601-DQB10336	0.679456	0.17	Strong binder
SSSGWTAGAAAYYVG	surface_glycoprotein_S1_254-260	11	HLA-DQA10602-DQB10301	0.679456	0.17	Strong binder
SSSGWTAGAAAYYVG	surface_glycoprotein_S1_254-260	11	HLA-DQA10602-DQB10309	0.679456	0.17	Strong binder
SSSGWTAGAAAYYVG	surface_glycoprotein_S1_254-260	11	HLA-DQA10602-DQB10310	0.679456	0.17	Strong binder
SSSGWTAGAAAYYVG	surface_glycoprotein_S1_254-260	11	HLA-DQA10602-DQB10316	0.679456	0.17	Strong binder
SSSGWTAGAAAYYVG	surface_glycoprotein_S1_254-260	11	HLA-DQA10602-DQB10319	0.679456	0.17	Strong binder
SSSGWTAGAAAYYVG	surface_glycoprotein_S1_254-260	11	HLA-DQA10602-DQB10321	0.679456	0.17	Strong binder
SSSGWTAGAAAYYVG	surface_glycoprotein_S1_254-260	11	HLA-DQA10602-DQB10322	0.679456	0.17	Strong binder
SSSGWTAGAAAYYVG	surface_glycoprotein_S1_254-260	11	HLA-DQA10602-DQB10324	0.679456	0.17	Strong binder
SSSGWTAGAAAYYVG	surface_glycoprotein_S1_254-260	11	HLA-DQA10602-DQB10327	0.679456	0.17	Strong binder
SSSGWTAGAAAYYVG	surface_glycoprotein_S1_254-260	11	HLA-DQA10602-DQB10328	0.699427	0.17	Strong binder
SSSGWTAGAAAYYVG	surface_glycoprotein_S1_254-260	11	HLA-DQA10602-DQB10329	0.679456	0.17	Strong binder
SSSGWTAGAAAYYVG	surface_glycoprotein_S1_254-260	11	HLA-DQA10602-DQB10335	0.679456	0.17	Strong binder
SSSGWTAGAAAYYVG	surface_glycoprotein_S1_254-260	11	HLA-DQA10602-DQB10336	0.679456	0.17	Strong binder
NSPRRARSVASQSII	surface_glycoprotein_S1-S2_682-689	8	HLA-DPA10103-DPB10301	0.828726	0.18	Strong binder
NSPRRARSVASQSII	surface_glycoprotein_S1-S2_682-689	8	HLA-DPA10103-DPB110401	0.828726	0.18	Strong binder
NSPRRARSVASQSII	surface_glycoprotein_S1-S2_682-689	8	HLA-DPA10103-DPB111101	0.828726	0.18	Strong binder
NSPRRARSVASQSII	surface_glycoprotein_S1-S2_682-689	8	HLA-DPA10103-DPB112401	0.828726	0.18	Strong binder
NSPRRARSVASQSII	surface_glycoprotein_S1-S2_682-689	8	HLA-DPA10103-DPB113201	0.787624	0.18	Strong binder
NSPRRARSVASQSII	surface_glycoprotein_S1-S2_682-689	8	HLA-DPA10103-DPB12501	0.828726	0.18	Strong binder
NSPRRARSVASQSII	surface_glycoprotein_S1-S2_682-689	8	HLA-DPA10103-DPB13501	0.787624	0.18	Strong binder
NSPRRARSVASQSII	surface_glycoprotein_S1-S2_682-689	8	HLA-DPA10103-DPB14501	0.828726	0.18	Strong binder
NSPRRARSVASQSII	surface_glycoprotein_S1-S2_682-689	8	HLA-DPA10103-DPB17001	0.828726	0.18	Strong binder
NSPRRARSVASQSII	surface_glycoprotein_S1-S2_682-689	8	HLA-DPA10103-DPB17601	0.828726	0.18	Strong binder
NSPRRARSVASQSII	surface_glycoprotein_S1-S2_682-689	8	HLA-DPA10103-DPB17801	0.828726	0.18	Strong binder
NSPRRARSVASQSII	surface_glycoprotein_S1-S2_682-689	8	HLA-DPA10103-DPB17901	0.787624	0.18	Strong binder
NSPRRARSVASQSII	surface_glycoprotein_S1-S2_682-689	8	HLA-DPA10103-DPB19201	0.828726	0.18	Strong binder
NSPRRARSVASQSII	surface_glycoprotein_S1-S2_682-689	8	HLA-DPA10104-DPB10301	0.828726	0.18	Strong binder
SPRRARSVASQSIIA	surface_glycoprotein_S1-S2_682-689	9	HLA-DPA10104-DPB10601	0.793414	0.18	Strong binder
NSPRRARSVASQSII	surface_glycoprotein_S1-S2_682-689	8	HLA-DPA10104-DPB110401	0.828726	0.18	Strong binder
NSPRRARSVASQSII	surface_glycoprotein_S1-S2_682-689	8	HLA-DPA10104-DPB111101	0.828726	0.18	Strong binder
NSPRRARSVASQSII	surface_glycoprotein_S1-S2_682-689	8	HLA-DPA10104-DPB112401	0.828726	0.18	Strong binder
NSPRRARSVASQSII	surface_glycoprotein_S1-S2_682-689	8	HLA-DPA10104-DPB113201	0.787624	0.18	Strong binder
NSPRRARSVASQSII	surface_glycoprotein_S1-S2_682-689	8	HLA-DPA10104-DPB12501	0.828726	0.18	Strong binder
NSPRRARSVASQSII	surface_glycoprotein_S1-S2_682-689	8	HLA-DPA10104-DPB13501	0.787624	0.18	Strong binder
NSPRRARSVASQSII	surface_glycoprotein_S1-S2_682-689	8	HLA-DPA10104-DPB14501	0.828726	0.18	Strong binder
NSPRRARSVASQSII	surface_glycoprotein_S1-S2_682-689	8	HLA-DPA10104-DPB17001	0.828726	0.18	Strong binder
NSPRRARSVASQSII	surface_glycoprotein_S1-S2_682-689	8	HLA-DPA10104-DPB17601	0.828726	0.18	Strong binder
NSPRRARSVASQSII	surface_glycoprotein_S1-S2_682-689	8	HLA-DPA10104-DPB17801	0.828726	0.18	Strong binder
NSPRRARSVASQSII	surface_glycoprotein_S1-S2_682-689	8	HLA-DPA10104-DPB17901	0.787624	0.18	Strong binder
NSPRRARSVASQSII	surface_glycoprotein_S1-S2_682-689	8	HLA-DPA10104-DPB19201	0.828726	0.18	Strong binder
NSPRRARSVASQSII	surface_glycoprotein_S1-S2_682-689	8	HLA-DPA10105-DPB10301	0.828726	0.18	Strong binder
SPRRARSVASQSIIA	surface_glycoprotein_S1-S2_682-689	9	HLA-DPA10105-DPB10601	0.793414	0.18	Strong binder
NSPRRARSVASQSII	surface_glycoprotein_S1-S2_682-689	8	HLA-DPA10105-DPB110401	0.828726	0.18	Strong binder
NSPRRARSVASQSII	surface_glycoprotein_S1-S2_682-689	8	HLA-DPA10105-DPB111101	0.828726	0.18	Strong binder
NSPRRARSVASQSII	surface_glycoprotein_S1-S2_682-689	8	HLA-DPA10105-DPB112401	0.828726	0.18	Strong binder
NSPRRARSVASQSII	surface_glycoprotein_S1-S2_682-689	8	HLA-DPA10105-DPB113201	0.787624	0.18	Strong binder
NSPRRARSVASQSII	surface_glycoprotein_S1-S2_682-689	8	HLA-DPA10105-DPB12501	0.828726	0.18	Strong binder
NSPRRARSVASQSII	surface_glycoprotein_S1-S2_682-689	8	HLA-DPA10105-DPB13501	0.787624	0.18	Strong binder
NSPRRARSVASQSII	surface_glycoprotein_S1-S2_682-689	8	HLA-DPA10105-DPB14501	0.828726	0.18	Strong binder
NSPRRARSVASQSII	surface_glycoprotein_S1-S2_682-689	8	HLA-DPA10105-DPB17001	0.828726	0.18	Strong binder
NSPRRARSVASQSII	surface_glycoprotein_S1-S2_682-689	8	HLA-DPA10105-DPB17601	0.828726	0.18	Strong binder
NSPRRARSVASQSII	surface_glycoprotein_S1-S2_682-689	8	HLA-DPA10105-DPB17801	0.828726	0.18	Strong binder
NSPRRARSVASQSII	surface_glycoprotein_S1-S2_682-689	8	HLA-DPA10105-DPB17901	0.787624	0.18	Strong binder
NSPRRARSVASQSII	surface_glycoprotein_S1-S2_682-689	8	HLA-DPA10105-DPB19201	0.828726	0.18	Strong binder
NSPRRARSVASQSII	surface_glycoprotein_S1-S2_682-689	8	HLA-DPA10107-DPB10301	0.828726	0.18	Strong binder
SPRRARSVASQSIIA	surface_glycoprotein_S1-S2_682-689	9	HLA-DPA10107-DPB10601	0.793414	0.18	Strong binder
NSPRRARSVASQSII	surface_glycoprotein_S1-S2_682-689	8	HLA-DPA10107-DPB110401	0.828726	0.18	Strong binder
NSPRRARSVASQSII	surface_glycoprotein_S1-S2_682-689	8	HLA-DPA10107-DPB111101	0.828726	0.18	Strong binder
NSPRRARSVASQSII	surface_glycoprotein_S1-S2_682-689	8	HLA-DPA10107-DPB112401	0.828726	0.18	Strong binder
NSPRRARSVASQSII	surface_glycoprotein_S1-S2_682-689	8	HLA-DPA10107-DPB113201	0.787624	0.18	Strong binder
NSPRRARSVASQSII	surface_glycoprotein_S1-S2_682-689	8	HLA-DPA10107-DPB12501	0.828726	0.18	Strong binder
NSPRRARSVASQSII	surface_glycoprotein_S1-S2_682-689	8	HLA-DPA10107-DPB13501	0.787624	0.18	Strong binder
NSPRRARSVASQSII	surface_glycoprotein_S1-S2_682-689	8	HLA-DPA10107-DPB14501	0.828726	0.18	Strong binder
NSPRRARSVASQSII	surface_glycoprotein_S1-S2_682-689	8	HLA-DPA10107-DPB17001	0.828726	0.18	Strong binder
NSPRRARSVASQSII	surface_glycoprotein_S1-S2_682-689	8	HLA-DPA10107-DPB17601	0.828726	0.18	Strong binder
NSPRRARSVASQSII	surface_glycoprotein_S1-S2_682-689	8	HLA-DPA10107-DPB17801	0.828726	0.18	Strong binder
NSPRRARSVASQSII	surface_glycoprotein_S1-S2_682-689	8	HLA-DPA10107-DPB17901	0.787624	0.18	Strong binder
NSPRRARSVASQSII	surface_glycoprotein_S1-S2_682-689	8	HLA-DPA10107-DPB19201	0.828726	0.18	Strong binder
NSPRRARSVASQSII	surface_glycoprotein_S1-S2_682-689	8	HLA-DPA10108-DPB10301	0.828726	0.18	Strong binder
SPRRARSVASQSIIA	surface_glycoprotein_S1-S2_682-689	9	HLA-DPA10108-DPB10601	0.793414	0.18	Strong binder
NSPRRARSVASQSII	surface_glycoprotein_S1-S2_682-689	8	HLA-DPA10108-DPB110401	0.828726	0.18	Strong binder
NSPRRARSVASQSII	surface_glycoprotein_S1-S2_682-689	8	HLA-DPA10108-DPB111101	0.828726	0.18	Strong binder
NSPRRARSVASQSII	surface_glycoprotein_S1-S2_682-689	8	HLA-DPA10108-DPB112401	0.828726	0.18	Strong binder
NSPRRARSVASQSII	surface_glycoprotein_S1-S2_682-689	8	HLA-DPA10108-DPB113201	0.787624	0.18	Strong binder
NSPRRARSVASQSII	surface_glycoprotein_S1-S2_682-689	8	HLA-DPA10108-DPB12501	0.828726	0.18	Strong binder
NSPRRARSVASQSII	surface_glycoprotein_S1-S2_682-689	8	HLA-DPA10108-DPB13501	0.787624	0.18	Strong binder
NSPRRARSVASQSII	surface_glycoprotein_S1-S2_682-689	8	HLA-DPA10108-DPB14501	0.828726	0.18	Strong binder
NSPRRARSVASQSII	surface_glycoprotein_S1-S2_682-689	8	HLA-DPA10108-DPB17001	0.828726	0.18	Strong binder
NSPRRARSVASQSII	surface_glycoprotein_S1-S2_682-689	8	HLA-DPA10108-DPB17601	0.828726	0.18	Strong binder
NSPRRARSVASQSII	surface_glycoprotein_S1-S2_682-689	8	HLA-DPA10108-DPB17801	0.828726	0.18	Strong binder
NSPRRARSVASQSII	surface_glycoprotein_S1-S2_682-689	8	HLA-DPA10108-DPB17901	0.787624	0.18	Strong binder
NSPRRARSVASQSII	surface_glycoprotein_S1-S2_682-689	8	HLA-DPA10108-DPB19201	0.828726	0.18	Strong binder
NSPRRARSVASQSII	surface_glycoprotein_S1-S2_682-689	8	HLA-DPA10109-DPB10301	0.828726	0.18	Strong binder
SPRRARSVASQSIIA	surface_glycoprotein_S1-S2_682-689	9	HLA-DPA10109-DPB10601	0.793414	0.18	Strong binder
NSPRRARSVASQSII	surface_glycoprotein_S1-S2_682-689	8	HLA-DPA10109-DPB110401	0.828726	0.18	Strong binder
NSPRRARSVASQSII	surface_glycoprotein_S1-S2_682-689	8	HLA-DPA10109-DPB111101	0.828726	0.18	Strong binder
NSPRRARSVASQSII	surface_glycoprotein_S1-S2_682-689	8	HLA-DPA10109-DPB112401	0.828726	0.18	Strong binder
NSPRRARSVASQSII	surface_glycoprotein_S1-S2_682-689	8	HLA-DPA10109-DPB113201	0.787624	0.18	Strong binder
NSPRRARSVASQSII	surface_glycoprotein_S1-S2_682-689	8	HLA-DPA10109-DPB12501	0.828726	0.18	Strong binder
NSPRRARSVASQSII	surface_glycoprotein_S1-S2_682-689	8	HLA-DPA10109-DPB13501	0.787624	0.18	Strong binder
NSPRRARSVASQSII	surface_glycoprotein_S1-S2_682-689	8	HLA-DPA10109-DPB14501	0.828726	0.18	Strong binder
NSPRRARSVASQSII	surface_glycoprotein_S1-S2_682-689	8	HLA-DPA10109-DPB17001	0.828726	0.18	Strong binder
NSPRRARSVASQSII	surface_glycoprotein_S1-S2_682-689	8	HLA-DPA10109-DPB17601	0.828726	0.18	Strong binder
NSPRRARSVASQSII	surface_glycoprotein_S1-S2_682-689	8	HLA-DPA10109-DPB17801	0.828726	0.18	Strong binder
NSPRRARSVASQSII	surface_glycoprotein_S1-S2_682-689	8	HLA-DPA10109-DPB17901	0.787624	0.18	Strong binder
NSPRRARSVASQSII	surface_glycoprotein_S1-S2_682-689	8	HLA-DPA10109-DPB19201	0.828726	0.18	Strong binder
NSPRRARSVASQSII	surface_glycoprotein_S1-S2_682-689	8	HLA-DPA10110-DPB10301	0.828726	0.18	Strong binder
SPRRARSVASQSIIA	surface_glycoprotein_S1-S2_682-689	9	HLA-DPA10110-DPB10601	0.793414	0.18	Strong binder
NSPRRARSVASQSII	surface_glycoprotein_S1-S2_682-689	8	HLA-DPA10110-DPB110401	0.828726	0.18	Strong binder
NSPRRARSVASQSII	surface_glycoprotein_S1-S2_682-689	8	HLA-DPA10110-DPB111101	0.828726	0.18	Strong binder
NSPRRARSVASQSII	surface_glycoprotein_S1-S2_682-689	8	HLA-DPA10110-DPB112401	0.828726	0.18	Strong binder
NSPRRARSVASQSII	surface_glycoprotein_S1-S2_682-689	8	HLA-DPA10110-DPB113201	0.787624	0.18	Strong binder
NSPRRARSVASQSII	surface_glycoprotein_S1-S2_682-689	8	HLA-DPA10110-DPB12501	0.828726	0.18	Strong binder
NSPRRARSVASQSII	surface_glycoprotein_S1-S2_682-689	8	HLA-DPA10110-DPB13501	0.787624	0.18	Strong binder
NSPRRARSVASQSII	surface_glycoprotein_S1-S2_682-689	8	HLA-DPA10110-DPB14501	0.828726	0.18	Strong binder
NSPRRARSVASQSII	surface_glycoprotein_S1-S2_682-689	8	HLA-DPA10110-DPB17001	0.828726	0.18	Strong binder
NSPRRARSVASQSII	surface_glycoprotein_S1-S2_682-689	8	HLA-DPA10110-DPB17601	0.828726	0.18	Strong binder
NSPRRARSVASQSII	surface_glycoprotein_S1-S2_682-689	8	HLA-DPA10110-DPB17801	0.828726	0.18	Strong binder
NSPRRARSVASQSII	surface_glycoprotein_S1-S2_682-689	8	HLA-DPA10110-DPB17901	0.787624	0.18	Strong binder
NSPRRARSVASQSII	surface_glycoprotein_S1-S2_682-689	8	HLA-DPA10110-DPB19201	0.828726	0.18	Strong binder
NSPRRARSVASQSII	surface_glycoprotein_S1-S2_682-689	8	HLA-DPA10203-DPB10301	0.828726	0.18	Strong binder
SPRRARSVASQSIIA	surface_glycoprotein_S1-S2_682-689	9	HLA-DPA10203-DPB10601	0.793414	0.18	Strong binder
NSPRRARSVASQSII	surface_glycoprotein_S1-S2_682-689	8	HLA-DPA10203-DPB110401	0.828726	0.18	Strong binder
NSPRRARSVASQSII	surface_glycoprotein_S1-S2_682-689	8	HLA-DPA10203-DPB111101	0.828726	0.18	Strong binder
NSPRRARSVASQSII	surface_glycoprotein_S1-S2_682-689	8	HLA-DPA10203-DPB112401	0.828726	0.18	Strong binder
NSPRRARSVASQSII	surface_glycoprotein_S1-S2_682-689	8	HLA-DPA10203-DPB113201	0.787624	0.18	Strong binder
NSPRRARSVASQSII	surface_glycoprotein_S1-S2_682-689	8	HLA-DPA10203-DPB12501	0.828726	0.18	Strong binder
NSPRRARSVASQSII	surface_glycoprotein_S1-S2_682-689	8	HLA-DPA10203-DPB13501	0.787624	0.18	Strong binder
NSPRRARSVASQSII	surface_glycoprotein_S1-S2_682-689	8	HLA-DPA10203-DPB14501	0.828726	0.18	Strong binder
NSPRRARSVASQSII	surface_glycoprotein_S1-S2_682-689	8	HLA-DPA10203-DPB17001	0.828726	0.18	Strong binder
NSPRRARSVASQSII	surface_glycoprotein_S1-S2_682-689	8	HLA-DPA10203-DPB17601	0.828726	0.18	Strong binder
NSPRRARSVASQSII	surface_glycoprotein_S1-S2_682-689	8	HLA-DPA10203-DPB17801	0.828726	0.18	Strong binder
NSPRRARSVASQSII	surface_glycoprotein_S1-S2_682-689	8	HLA-DPA10203-DPB17901	0.787624	0.18	Strong binder
NSPRRARSVASQSII	surface_glycoprotein_S1-S2_682-689	8	HLA-DPA10203-DPB19201	0.828726	0.18	Strong binder
TNSPRRARSVASQSI	surface_glycoprotein_S1-S2_682-689	7	HLA-DPA10302-DPB10601	0.67803	0.18	Strong binder
SPRRARSVASQSIIA	surface_glycoprotein_S1-S2_682-689	9	HLA-DPA10401-DPB11001	0.61527	0.18	Strong binder
NSPRRARSVASQSII	surface_glycoprotein_S1-S2_682-689	8	HLA-DPA10401-DPB113201	0.723906	0.18	Strong binder
NSPRRARSVASQSII	surface_glycoprotein_S1-S2_682-689	8	HLA-DPA10401-DPB13501	0.723906	0.18	Strong binder
SPRRARSVASQSIIA	surface_glycoprotein_S1-S2_682-689	9	HLA-DPA10401-DPB13701	0.61527	0.18	Strong binder
NSPRRARSVASQSII	surface_glycoprotein_S1-S2_682-689	8	HLA-DPA10401-DPB17901	0.723906	0.18	Strong binder
SPRRARSVASQSIIA	surface_glycoprotein_S1-S2_682-689	9	HLA-DPA10401-DPB18801	0.61527	0.18	Strong binder
RNPANNAAIVLQLPQ	N_protein_158-164	2	HLA-DQA10101-DQB10601	0.420651	0.18	Strong binder
RNPANNAAIVLQLPQ	N_protein_158-164	2	HLA-DQA10101-DQB10635	0.420651	0.18	Strong binder
RNPANNAAIVLQLPQ	N_protein_158-164	2	HLA-DQA10101-DQB10643	0.420651	0.18	Strong binder
PANNAAIVLQLPQGT	N_protein_158-164	4	HLA-DQA10102-DQB10633	0.716214	0.18	Strong binder
RNPANNAAIVLQLPQ	N_protein_158-164	2	HLA-DQA10103-DQB10622	0.458539	0.18	Strong binder
PANNAAIVLQLPQGT	N_protein_158-164	4	HLA-DQA10103-DQB10633	0.673681	0.18	Strong binder
RNPANNAAIVLQLPQ	N_protein_158-164	2	HLA-DQA10104-DQB10601	0.420651	0.18	Strong binder
RNPANNAAIVLQLPQ	N_protein_158-164	2	HLA-DQA10104-DQB10635	0.420651	0.18	Strong binder
RNPANNAAIVLQLPQ	N_protein_158-164	2	HLA-DQA10104-DQB10643	0.420651	0.18	Strong binder
RNPANNAAIVLQLPQ	N_protein_158-164	2	HLA-DQA10105-DQB10601	0.420651	0.18	Strong binder
RNPANNAAIVLQLPQ	N_protein_158-164	2	HLA-DQA10105-DQB10635	0.420651	0.18	Strong binder
RNPANNAAIVLQLPQ	N_protein_158-164	2	HLA-DQA10105-DQB10643	0.420651	0.18	Strong binder
PANNAAIVLQLPQGT	N_protein_158-164	4	HLA-DQA10106-DQB10633	0.716214	0.18	Strong binder
RNPANNAAIVLQLPQ	N_protein_158-164	2	HLA-DQA10107-DQB10601	0.420651	0.18	Strong binder
RNPANNAAIVLQLPQ	N_protein_158-164	2	HLA-DQA10107-DQB10635	0.420651	0.18	Strong binder
RNPANNAAIVLQLPQ	N_protein_158-164	2	HLA-DQA10107-DQB10643	0.420651	0.18	Strong binder
PANNAAIVLQLPQGT	N_protein_158-164	4	HLA-DQA10108-DQB10633	0.716214	0.18	Strong binder
PANNAAIVLQLPQGT	N_protein_158-164	4	HLA-DQA10109-DQB10633	0.716214	0.18	Strong binder
SSGWTAGAAAYYVGY	surface_glycoprotein_S1_254-260	12	HLA-DQA10301-DQB10304	0.111128	0.18	Strong binder
SSGWTAGAAAYYVGY	surface_glycoprotein_S1_254-260	12	HLA-DQA10301-DQB10314	0.111128	0.18	Strong binder
SSGWTAGAAAYYVGY	surface_glycoprotein_S1_254-260	12	HLA-DQA10302-DQB10304	0.111128	0.18	Strong binder
SSGWTAGAAAYYVGY	surface_glycoprotein_S1_254-260	12	HLA-DQA10302-DQB10314	0.111128	0.18	Strong binder
SSGWTAGAAAYYVGY	surface_glycoprotein_S1_254-260	12	HLA-DQA10303-DQB10304	0.111128	0.18	Strong binder
SSGWTAGAAAYYVGY	surface_glycoprotein_S1_254-260	12	HLA-DQA10303-DQB10314	0.111128	0.18	Strong binder
SSSGWTAGAAAYYVG	surface_glycoprotein_S1_254-260	11	HLA-DQA10501-DQB10313	0.827314	0.18	Strong binder
SSGWTAGAAAYYVGY	surface_glycoprotein_S1_254-260	12	HLA-DQA10501-DQB10618	0.213013	0.18	Strong binder
SSGWTAGAAAYYVGY	surface_glycoprotein_S1_254-260	12	HLA-DQA10501-DQB10622	0.210374	0.18	Strong binder
SSSGWTAGAAAYYVG	surface_glycoprotein_S1_254-260	11	HLA-DQA10503-DQB10313	0.827314	0.18	Strong binder
SSGWTAGAAAYYVGY	surface_glycoprotein_S1_254-260	12	HLA-DQA10503-DQB10618	0.213013	0.18	Strong binder
SSGWTAGAAAYYVGY	surface_glycoprotein_S1_254-260	12	HLA-DQA10503-DQB10622	0.210374	0.18	Strong binder
SSSGWTAGAAAYYVG	surface_glycoprotein_S1_254-260	11	HLA-DQA10504-DQB10313	0.827314	0.18	Strong binder
SSGWTAGAAAYYVGY	surface_glycoprotein_S1_254-260	12	HLA-DQA10504-DQB10618	0.213013	0.18	Strong binder
SSGWTAGAAAYYVGY	surface_glycoprotein_S1_254-260	12	HLA-DQA10504-DQB10622	0.210374	0.18	Strong binder
SSSGWTAGAAAYYVG	surface_glycoprotein_S1_254-260	11	HLA-DQA10505-DQB10313	0.827314	0.18	Strong binder
SSGWTAGAAAYYVGY	surface_glycoprotein_S1_254-260	12	HLA-DQA10505-DQB10618	0.213013	0.18	Strong binder
SSGWTAGAAAYYVGY	surface_glycoprotein_S1_254-260	12	HLA-DQA10505-DQB10622	0.210374	0.18	Strong binder
SSSGWTAGAAAYYVG	surface_glycoprotein_S1_254-260	11	HLA-DQA10506-DQB10313	0.827314	0.18	Strong binder
SSGWTAGAAAYYVGY	surface_glycoprotein_S1_254-260	12	HLA-DQA10506-DQB10618	0.213013	0.18	Strong binder
SSGWTAGAAAYYVGY	surface_glycoprotein_S1_254-260	12	HLA-DQA10506-DQB10622	0.210374	0.18	Strong binder
SSSGWTAGAAAYYVG	surface_glycoprotein_S1_254-260	11	HLA-DQA10507-DQB10313	0.827314	0.18	Strong binder
SSGWTAGAAAYYVGY	surface_glycoprotein_S1_254-260	12	HLA-DQA10507-DQB10618	0.213013	0.18	Strong binder
SSGWTAGAAAYYVGY	surface_glycoprotein_S1_254-260	12	HLA-DQA10507-DQB10622	0.210374	0.18	Strong binder
SSSGWTAGAAAYYVG	surface_glycoprotein_S1_254-260	11	HLA-DQA10508-DQB10313	0.827314	0.18	Strong binder
SSGWTAGAAAYYVGY	surface_glycoprotein_S1_254-260	12	HLA-DQA10508-DQB10618	0.213013	0.18	Strong binder
SSGWTAGAAAYYVGY	surface_glycoprotein_S1_254-260	12	HLA-DQA10508-DQB10622	0.210374	0.18	Strong binder
SSSGWTAGAAAYYVG	surface_glycoprotein_S1_254-260	11	HLA-DQA10509-DQB10313	0.827314	0.18	Strong binder
SSGWTAGAAAYYVGY	surface_glycoprotein_S1_254-260	12	HLA-DQA10509-DQB10618	0.213013	0.18	Strong binder
SSGWTAGAAAYYVGY	surface_glycoprotein_S1_254-260	12	HLA-DQA10509-DQB10622	0.210374	0.18	Strong binder
SSSGWTAGAAAYYVG	surface_glycoprotein_S1_254-260	11	HLA-DQA10510-DQB10313	0.827314	0.18	Strong binder
SSGWTAGAAAYYVGY	surface_glycoprotein_S1_254-260	12	HLA-DQA10510-DQB10618	0.213013	0.18	Strong binder
SSGWTAGAAAYYVGY	surface_glycoprotein_S1_254-260	12	HLA-DQA10510-DQB10622	0.210374	0.18	Strong binder
SSSGWTAGAAAYYVG	surface_glycoprotein_S1_254-260	11	HLA-DQA10511-DQB10313	0.827314	0.18	Strong binder
SSGWTAGAAAYYVGY	surface_glycoprotein_S1_254-260	12	HLA-DQA10511-DQB10618	0.213013	0.18	Strong binder
SSGWTAGAAAYYVGY	surface_glycoprotein_S1_254-260	12	HLA-DQA10511-DQB10622	0.210374	0.18	Strong binder
SPRRARSVASQSIIA	surface_glycoprotein_S1-S2_682-689	9	HLA-DPA10401-DPB113001	0.776871	0.19	Strong binder
SPRRARSVASQSIIA	surface_glycoprotein_S1-S2_682-689	9	HLA-DPA10401-DPB12001	0.776871	0.19	Strong binder
SPRRARSVASQSIIA	surface_glycoprotein_S1-S2_682-689	9	HLA-DPA10401-DPB19101	0.776871	0.19	Strong binder
NSPRRARSVASQSII	surface_glycoprotein_S1-S2_682-689	8	HLA-DPA10401-DPB19801	0.760061	0.19	Strong binder
RNPANNAAIVLQLPQ	N_protein_158-164	2	HLA-DQA10102-DQB10610	0.427783	0.19	Strong binder
RNPANNAAIVLQLPQ	N_protein_158-164	2	HLA-DQA10102-DQB10611	0.61807	0.19	Strong binder
RNPANNAAIVLQLPQ	N_protein_158-164	2	HLA-DQA10103-DQB10601	0.619932	0.19	Strong binder
PANNAAIVLQLPQGT	N_protein_158-164	4	HLA-DQA10103-DQB10602	0.70979	0.19	Strong binder
RNPANNAAIVLQLPQ	N_protein_158-164	2	HLA-DQA10103-DQB10610	0.457817	0.19	Strong binder
PANNAAIVLQLPQGT	N_protein_158-164	4	HLA-DQA10103-DQB10616	0.70979	0.19	Strong binder
PANNAAIVLQLPQGT	N_protein_158-164	4	HLA-DQA10103-DQB10619	0.70979	0.19	Strong binder
RNPANNAAIVLQLPQ	N_protein_158-164	2	HLA-DQA10103-DQB10635	0.619932	0.19	Strong binder
RNPANNAAIVLQLPQ	N_protein_158-164	2	HLA-DQA10103-DQB10643	0.619932	0.19	Strong binder
RNPANNAAIVLQLPQ	N_protein_158-164	2	HLA-DQA10106-DQB10610	0.427783	0.19	Strong binder
RNPANNAAIVLQLPQ	N_protein_158-164	2	HLA-DQA10106-DQB10611	0.61807	0.19	Strong binder
RNPANNAAIVLQLPQ	N_protein_158-164	2	HLA-DQA10108-DQB10610	0.427783	0.19	Strong binder
RNPANNAAIVLQLPQ	N_protein_158-164	2	HLA-DQA10108-DQB10611	0.61807	0.19	Strong binder
RNPANNAAIVLQLPQ	N_protein_158-164	2	HLA-DQA10109-DQB10610	0.427783	0.19	Strong binder
RNPANNAAIVLQLPQ	N_protein_158-164	2	HLA-DQA10109-DQB10611	0.61807	0.19	Strong binder
SSSGWTAGAAAYYVG	surface_glycoprotein_S1_254-260	11	HLA-DQA10201-DQB10601	0.529359	0.19	Strong binder
SSSGWTAGAAAYYVG	surface_glycoprotein_S1_254-260	11	HLA-DQA10201-DQB10635	0.529359	0.19	Strong binder
SSSGWTAGAAAYYVG	surface_glycoprotein_S1_254-260	11	HLA-DQA10201-DQB10643	0.529359	0.19	Strong binder
SSGWTAGAAAYYVGY	surface_glycoprotein_S1_254-260	12	HLA-DQA10401-DQB10609	0.248211	0.19	Strong binder
SSGWTAGAAAYYVGY	surface_glycoprotein_S1_254-260	12	HLA-DQA10402-DQB10609	0.248211	0.19	Strong binder
SSGWTAGAAAYYVGY	surface_glycoprotein_S1_254-260	12	HLA-DQA10404-DQB10609	0.248211	0.19	Strong binder
SSGWTAGAAAYYVGY	surface_glycoprotein_S1_254-260	12	HLA-DQA10501-DQB10203	0.663142	0.19	Strong binder
SGWTAGAAAYYVGYL	surface_glycoprotein_S1_254-260	13	HLA-DQA10501-DQB10304	0.506927	0.19	Strong binder
SGWTAGAAAYYVGYL	surface_glycoprotein_S1_254-260	13	HLA-DQA10501-DQB10314	0.506927	0.19	Strong binder
SSGWTAGAAAYYVGY	surface_glycoprotein_S1_254-260	12	HLA-DQA10503-DQB10203	0.663142	0.19	Strong binder
SGWTAGAAAYYVGYL	surface_glycoprotein_S1_254-260	13	HLA-DQA10503-DQB10304	0.506927	0.19	Strong binder
SGWTAGAAAYYVGYL	surface_glycoprotein_S1_254-260	13	HLA-DQA10503-DQB10314	0.506927	0.19	Strong binder
SSGWTAGAAAYYVGY	surface_glycoprotein_S1_254-260	12	HLA-DQA10504-DQB10203	0.663142	0.19	Strong binder
SGWTAGAAAYYVGYL	surface_glycoprotein_S1_254-260	13	HLA-DQA10504-DQB10304	0.506927	0.19	Strong binder
SGWTAGAAAYYVGYL	surface_glycoprotein_S1_254-260	13	HLA-DQA10504-DQB10314	0.506927	0.19	Strong binder
SSGWTAGAAAYYVGY	surface_glycoprotein_S1_254-260	12	HLA-DQA10505-DQB10203	0.663142	0.19	Strong binder
SGWTAGAAAYYVGYL	surface_glycoprotein_S1_254-260	13	HLA-DQA10505-DQB10304	0.506927	0.19	Strong binder
SGWTAGAAAYYVGYL	surface_glycoprotein_S1_254-260	13	HLA-DQA10505-DQB10314	0.506927	0.19	Strong binder
SSGWTAGAAAYYVGY	surface_glycoprotein_S1_254-260	12	HLA-DQA10506-DQB10203	0.663142	0.19	Strong binder
SGWTAGAAAYYVGYL	surface_glycoprotein_S1_254-260	13	HLA-DQA10506-DQB10304	0.506927	0.19	Strong binder
SGWTAGAAAYYVGYL	surface_glycoprotein_S1_254-260	13	HLA-DQA10506-DQB10314	0.506927	0.19	Strong binder
SSGWTAGAAAYYVGY	surface_glycoprotein_S1_254-260	12	HLA-DQA10507-DQB10203	0.663142	0.19	Strong binder
SGWTAGAAAYYVGYL	surface_glycoprotein_S1_254-260	13	HLA-DQA10507-DQB10304	0.506927	0.19	Strong binder
SGWTAGAAAYYVGYL	surface_glycoprotein_S1_254-260	13	HLA-DQA10507-DQB10314	0.506927	0.19	Strong binder
SSGWTAGAAAYYVGY	surface_glycoprotein_S1_254-260	12	HLA-DQA10508-DQB10203	0.663142	0.19	Strong binder
SGWTAGAAAYYVGYL	surface_glycoprotein_S1_254-260	13	HLA-DQA10508-DQB10304	0.506927	0.19	Strong binder
SGWTAGAAAYYVGYL	surface_glycoprotein_S1_254-260	13	HLA-DQA10508-DQB10314	0.506927	0.19	Strong binder
SSGWTAGAAAYYVGY	surface_glycoprotein_S1_254-260	12	HLA-DQA10509-DQB10203	0.663142	0.19	Strong binder
SGWTAGAAAYYVGYL	surface_glycoprotein_S1_254-260	13	HLA-DQA10509-DQB10304	0.506927	0.19	Strong binder
SGWTAGAAAYYVGYL	surface_glycoprotein_S1_254-260	13	HLA-DQA10509-DQB10314	0.506927	0.19	Strong binder
SSGWTAGAAAYYVGY	surface_glycoprotein_S1_254-260	12	HLA-DQA10510-DQB10203	0.663142	0.19	Strong binder
SGWTAGAAAYYVGYL	surface_glycoprotein_S1_254-260	13	HLA-DQA10510-DQB10304	0.506927	0.19	Strong binder
SGWTAGAAAYYVGYL	surface_glycoprotein_S1_254-260	13	HLA-DQA10510-DQB10314	0.506927	0.19	Strong binder
SSGWTAGAAAYYVGY	surface_glycoprotein_S1_254-260	12	HLA-DQA10511-DQB10203	0.663142	0.19	Strong binder
SGWTAGAAAYYVGYL	surface_glycoprotein_S1_254-260	13	HLA-DQA10511-DQB10304	0.506927	0.19	Strong binder
SGWTAGAAAYYVGYL	surface_glycoprotein_S1_254-260	13	HLA-DQA10511-DQB10314	0.506927	0.19	Strong binder
SSGWTAGAAAYYVGY	surface_glycoprotein_S1_254-260	12	HLA-DQA10601-DQB10330	0.274145	0.19	Strong binder
SSGWTAGAAAYYVGY	surface_glycoprotein_S1_254-260	12	HLA-DQA10601-DQB10615	0.306942	0.19	Strong binder
SSSGWTAGAAAYYVG	surface_glycoprotein_S1_254-260	11	HLA-DQA10601-DQB10622	0.238804	0.19	Strong binder
SSGWTAGAAAYYVGY	surface_glycoprotein_S1_254-260	12	HLA-DQA10602-DQB10330	0.274145	0.19	Strong binder
SSGWTAGAAAYYVGY	surface_glycoprotein_S1_254-260	12	HLA-DQA10602-DQB10615	0.306942	0.19	Strong binder
SSSGWTAGAAAYYVG	surface_glycoprotein_S1_254-260	11	HLA-DQA10602-DQB10622	0.238804	0.19	Strong binder
TNSPRRARSVASQSI	surface_glycoprotein_S1-S2_682-689	7	HLA-DPA10103-DPB10301	0.819212	0.2	Strong binder
TNSPRRARSVASQSI	surface_glycoprotein_S1-S2_682-689	7	HLA-DPA10103-DPB11001	0.602543	0.2	Strong binder
TNSPRRARSVASQSI	surface_glycoprotein_S1-S2_682-689	7	HLA-DPA10103-DPB110401	0.819212	0.2	Strong binder
TNSPRRARSVASQSI	surface_glycoprotein_S1-S2_682-689	7	HLA-DPA10103-DPB111101	0.819212	0.2	Strong binder
TNSPRRARSVASQSI	surface_glycoprotein_S1-S2_682-689	7	HLA-DPA10103-DPB112401	0.819212	0.2	Strong binder
TNSPRRARSVASQSI	surface_glycoprotein_S1-S2_682-689	7	HLA-DPA10103-DPB113101	0.73566	0.2	Strong binder
TNSPRRARSVASQSI	surface_glycoprotein_S1-S2_682-689	7	HLA-DPA10103-DPB113201	0.778367	0.2	Strong binder
TNSPRRARSVASQSI	surface_glycoprotein_S1-S2_682-689	7	HLA-DPA10103-DPB11701	0.73566	0.2	Strong binder
TNSPRRARSVASQSI	surface_glycoprotein_S1-S2_682-689	7	HLA-DPA10103-DPB12501	0.819212	0.2	Strong binder
TNSPRRARSVASQSI	surface_glycoprotein_S1-S2_682-689	7	HLA-DPA10103-DPB13501	0.778367	0.2	Strong binder
TNSPRRARSVASQSI	surface_glycoprotein_S1-S2_682-689	7	HLA-DPA10103-DPB13701	0.602543	0.2	Strong binder
TNSPRRARSVASQSI	surface_glycoprotein_S1-S2_682-689	7	HLA-DPA10103-DPB14501	0.819212	0.2	Strong binder
TNSPRRARSVASQSI	surface_glycoprotein_S1-S2_682-689	7	HLA-DPA10103-DPB17001	0.819212	0.2	Strong binder
TNSPRRARSVASQSI	surface_glycoprotein_S1-S2_682-689	7	HLA-DPA10103-DPB17601	0.819212	0.2	Strong binder
TNSPRRARSVASQSI	surface_glycoprotein_S1-S2_682-689	7	HLA-DPA10103-DPB17801	0.819212	0.2	Strong binder
TNSPRRARSVASQSI	surface_glycoprotein_S1-S2_682-689	7	HLA-DPA10103-DPB17901	0.778367	0.2	Strong binder
TNSPRRARSVASQSI	surface_glycoprotein_S1-S2_682-689	7	HLA-DPA10103-DPB18801	0.602543	0.2	Strong binder
TNSPRRARSVASQSI	surface_glycoprotein_S1-S2_682-689	7	HLA-DPA10103-DPB19201	0.819212	0.2	Strong binder
TNSPRRARSVASQSI	surface_glycoprotein_S1-S2_682-689	7	HLA-DPA10103-DPB19301	0.73566	0.2	Strong binder
TNSPRRARSVASQSI	surface_glycoprotein_S1-S2_682-689	7	HLA-DPA10104-DPB10301	0.819212	0.2	Strong binder
TNSPRRARSVASQSI	surface_glycoprotein_S1-S2_682-689	7	HLA-DPA10104-DPB11001	0.602543	0.2	Strong binder
TNSPRRARSVASQSI	surface_glycoprotein_S1-S2_682-689	7	HLA-DPA10104-DPB110401	0.819212	0.2	Strong binder
TNSPRRARSVASQSI	surface_glycoprotein_S1-S2_682-689	7	HLA-DPA10104-DPB111101	0.819212	0.2	Strong binder
TNSPRRARSVASQSI	surface_glycoprotein_S1-S2_682-689	7	HLA-DPA10104-DPB112401	0.819212	0.2	Strong binder
TNSPRRARSVASQSI	surface_glycoprotein_S1-S2_682-689	7	HLA-DPA10104-DPB113101	0.73566	0.2	Strong binder
TNSPRRARSVASQSI	surface_glycoprotein_S1-S2_682-689	7	HLA-DPA10104-DPB113201	0.778367	0.2	Strong binder
TNSPRRARSVASQSI	surface_glycoprotein_S1-S2_682-689	7	HLA-DPA10104-DPB11701	0.73566	0.2	Strong binder
TNSPRRARSVASQSI	surface_glycoprotein_S1-S2_682-689	7	HLA-DPA10104-DPB12501	0.819212	0.2	Strong binder
TNSPRRARSVASQSI	surface_glycoprotein_S1-S2_682-689	7	HLA-DPA10104-DPB13501	0.778367	0.2	Strong binder
TNSPRRARSVASQSI	surface_glycoprotein_S1-S2_682-689	7	HLA-DPA10104-DPB13701	0.602543	0.2	Strong binder
TNSPRRARSVASQSI	surface_glycoprotein_S1-S2_682-689	7	HLA-DPA10104-DPB14501	0.819212	0.2	Strong binder
TNSPRRARSVASQSI	surface_glycoprotein_S1-S2_682-689	7	HLA-DPA10104-DPB17001	0.819212	0.2	Strong binder
TNSPRRARSVASQSI	surface_glycoprotein_S1-S2_682-689	7	HLA-DPA10104-DPB17601	0.819212	0.2	Strong binder
TNSPRRARSVASQSI	surface_glycoprotein_S1-S2_682-689	7	HLA-DPA10104-DPB17801	0.819212	0.2	Strong binder
TNSPRRARSVASQSI	surface_glycoprotein_S1-S2_682-689	7	HLA-DPA10104-DPB17901	0.778367	0.2	Strong binder
TNSPRRARSVASQSI	surface_glycoprotein_S1-S2_682-689	7	HLA-DPA10104-DPB18801	0.602543	0.2	Strong binder
TNSPRRARSVASQSI	surface_glycoprotein_S1-S2_682-689	7	HLA-DPA10104-DPB19201	0.819212	0.2	Strong binder
TNSPRRARSVASQSI	surface_glycoprotein_S1-S2_682-689	7	HLA-DPA10104-DPB19301	0.73566	0.2	Strong binder
TNSPRRARSVASQSI	surface_glycoprotein_S1-S2_682-689	7	HLA-DPA10105-DPB10301	0.819212	0.2	Strong binder
TNSPRRARSVASQSI	surface_glycoprotein_S1-S2_682-689	7	HLA-DPA10105-DPB11001	0.602543	0.2	Strong binder
TNSPRRARSVASQSI	surface_glycoprotein_S1-S2_682-689	7	HLA-DPA10105-DPB110401	0.819212	0.2	Strong binder
TNSPRRARSVASQSI	surface_glycoprotein_S1-S2_682-689	7	HLA-DPA10105-DPB111101	0.819212	0.2	Strong binder
TNSPRRARSVASQSI	surface_glycoprotein_S1-S2_682-689	7	HLA-DPA10105-DPB112401	0.819212	0.2	Strong binder
TNSPRRARSVASQSI	surface_glycoprotein_S1-S2_682-689	7	HLA-DPA10105-DPB113101	0.73566	0.2	Strong binder
TNSPRRARSVASQSI	surface_glycoprotein_S1-S2_682-689	7	HLA-DPA10105-DPB113201	0.778367	0.2	Strong binder
TNSPRRARSVASQSI	surface_glycoprotein_S1-S2_682-689	7	HLA-DPA10105-DPB11701	0.73566	0.2	Strong binder
TNSPRRARSVASQSI	surface_glycoprotein_S1-S2_682-689	7	HLA-DPA10105-DPB12501	0.819212	0.2	Strong binder
TNSPRRARSVASQSI	surface_glycoprotein_S1-S2_682-689	7	HLA-DPA10105-DPB13501	0.778367	0.2	Strong binder
TNSPRRARSVASQSI	surface_glycoprotein_S1-S2_682-689	7	HLA-DPA10105-DPB13701	0.602543	0.2	Strong binder
TNSPRRARSVASQSI	surface_glycoprotein_S1-S2_682-689	7	HLA-DPA10105-DPB14501	0.819212	0.2	Strong binder
TNSPRRARSVASQSI	surface_glycoprotein_S1-S2_682-689	7	HLA-DPA10105-DPB17001	0.819212	0.2	Strong binder
TNSPRRARSVASQSI	surface_glycoprotein_S1-S2_682-689	7	HLA-DPA10105-DPB17601	0.819212	0.2	Strong binder
TNSPRRARSVASQSI	surface_glycoprotein_S1-S2_682-689	7	HLA-DPA10105-DPB17801	0.819212	0.2	Strong binder
TNSPRRARSVASQSI	surface_glycoprotein_S1-S2_682-689	7	HLA-DPA10105-DPB17901	0.778367	0.2	Strong binder
TNSPRRARSVASQSI	surface_glycoprotein_S1-S2_682-689	7	HLA-DPA10105-DPB18801	0.602543	0.2	Strong binder
TNSPRRARSVASQSI	surface_glycoprotein_S1-S2_682-689	7	HLA-DPA10105-DPB19201	0.819212	0.2	Strong binder
TNSPRRARSVASQSI	surface_glycoprotein_S1-S2_682-689	7	HLA-DPA10105-DPB19301	0.73566	0.2	Strong binder
TNSPRRARSVASQSI	surface_glycoprotein_S1-S2_682-689	7	HLA-DPA10107-DPB10301	0.819212	0.2	Strong binder
TNSPRRARSVASQSI	surface_glycoprotein_S1-S2_682-689	7	HLA-DPA10107-DPB11001	0.602543	0.2	Strong binder
TNSPRRARSVASQSI	surface_glycoprotein_S1-S2_682-689	7	HLA-DPA10107-DPB110401	0.819212	0.2	Strong binder
TNSPRRARSVASQSI	surface_glycoprotein_S1-S2_682-689	7	HLA-DPA10107-DPB111101	0.819212	0.2	Strong binder
TNSPRRARSVASQSI	surface_glycoprotein_S1-S2_682-689	7	HLA-DPA10107-DPB112401	0.819212	0.2	Strong binder
TNSPRRARSVASQSI	surface_glycoprotein_S1-S2_682-689	7	HLA-DPA10107-DPB113101	0.73566	0.2	Strong binder
TNSPRRARSVASQSI	surface_glycoprotein_S1-S2_682-689	7	HLA-DPA10107-DPB113201	0.778367	0.2	Strong binder
TNSPRRARSVASQSI	surface_glycoprotein_S1-S2_682-689	7	HLA-DPA10107-DPB11701	0.73566	0.2	Strong binder
TNSPRRARSVASQSI	surface_glycoprotein_S1-S2_682-689	7	HLA-DPA10107-DPB12501	0.819212	0.2	Strong binder
TNSPRRARSVASQSI	surface_glycoprotein_S1-S2_682-689	7	HLA-DPA10107-DPB13501	0.778367	0.2	Strong binder
TNSPRRARSVASQSI	surface_glycoprotein_S1-S2_682-689	7	HLA-DPA10107-DPB13701	0.602543	0.2	Strong binder
TNSPRRARSVASQSI	surface_glycoprotein_S1-S2_682-689	7	HLA-DPA10107-DPB14501	0.819212	0.2	Strong binder
TNSPRRARSVASQSI	surface_glycoprotein_S1-S2_682-689	7	HLA-DPA10107-DPB17001	0.819212	0.2	Strong binder
TNSPRRARSVASQSI	surface_glycoprotein_S1-S2_682-689	7	HLA-DPA10107-DPB17601	0.819212	0.2	Strong binder
TNSPRRARSVASQSI	surface_glycoprotein_S1-S2_682-689	7	HLA-DPA10107-DPB17801	0.819212	0.2	Strong binder
TNSPRRARSVASQSI	surface_glycoprotein_S1-S2_682-689	7	HLA-DPA10107-DPB17901	0.778367	0.2	Strong binder
TNSPRRARSVASQSI	surface_glycoprotein_S1-S2_682-689	7	HLA-DPA10107-DPB18801	0.602543	0.2	Strong binder
TNSPRRARSVASQSI	surface_glycoprotein_S1-S2_682-689	7	HLA-DPA10107-DPB19201	0.819212	0.2	Strong binder
TNSPRRARSVASQSI	surface_glycoprotein_S1-S2_682-689	7	HLA-DPA10107-DPB19301	0.73566	0.2	Strong binder
TNSPRRARSVASQSI	surface_glycoprotein_S1-S2_682-689	7	HLA-DPA10108-DPB10301	0.819212	0.2	Strong binder
TNSPRRARSVASQSI	surface_glycoprotein_S1-S2_682-689	7	HLA-DPA10108-DPB11001	0.602543	0.2	Strong binder
TNSPRRARSVASQSI	surface_glycoprotein_S1-S2_682-689	7	HLA-DPA10108-DPB110401	0.819212	0.2	Strong binder
TNSPRRARSVASQSI	surface_glycoprotein_S1-S2_682-689	7	HLA-DPA10108-DPB111101	0.819212	0.2	Strong binder
TNSPRRARSVASQSI	surface_glycoprotein_S1-S2_682-689	7	HLA-DPA10108-DPB112401	0.819212	0.2	Strong binder
TNSPRRARSVASQSI	surface_glycoprotein_S1-S2_682-689	7	HLA-DPA10108-DPB113101	0.73566	0.2	Strong binder
TNSPRRARSVASQSI	surface_glycoprotein_S1-S2_682-689	7	HLA-DPA10108-DPB113201	0.778367	0.2	Strong binder
TNSPRRARSVASQSI	surface_glycoprotein_S1-S2_682-689	7	HLA-DPA10108-DPB11701	0.73566	0.2	Strong binder
TNSPRRARSVASQSI	surface_glycoprotein_S1-S2_682-689	7	HLA-DPA10108-DPB12501	0.819212	0.2	Strong binder
TNSPRRARSVASQSI	surface_glycoprotein_S1-S2_682-689	7	HLA-DPA10108-DPB13501	0.778367	0.2	Strong binder
TNSPRRARSVASQSI	surface_glycoprotein_S1-S2_682-689	7	HLA-DPA10108-DPB13701	0.602543	0.2	Strong binder
TNSPRRARSVASQSI	surface_glycoprotein_S1-S2_682-689	7	HLA-DPA10108-DPB14501	0.819212	0.2	Strong binder
TNSPRRARSVASQSI	surface_glycoprotein_S1-S2_682-689	7	HLA-DPA10108-DPB17001	0.819212	0.2	Strong binder
TNSPRRARSVASQSI	surface_glycoprotein_S1-S2_682-689	7	HLA-DPA10108-DPB17601	0.819212	0.2	Strong binder
TNSPRRARSVASQSI	surface_glycoprotein_S1-S2_682-689	7	HLA-DPA10108-DPB17801	0.819212	0.2	Strong binder
TNSPRRARSVASQSI	surface_glycoprotein_S1-S2_682-689	7	HLA-DPA10108-DPB17901	0.778367	0.2	Strong binder
TNSPRRARSVASQSI	surface_glycoprotein_S1-S2_682-689	7	HLA-DPA10108-DPB18801	0.602543	0.2	Strong binder
TNSPRRARSVASQSI	surface_glycoprotein_S1-S2_682-689	7	HLA-DPA10108-DPB19201	0.819212	0.2	Strong binder
TNSPRRARSVASQSI	surface_glycoprotein_S1-S2_682-689	7	HLA-DPA10108-DPB19301	0.73566	0.2	Strong binder
TNSPRRARSVASQSI	surface_glycoprotein_S1-S2_682-689	7	HLA-DPA10109-DPB10301	0.819212	0.2	Strong binder
TNSPRRARSVASQSI	surface_glycoprotein_S1-S2_682-689	7	HLA-DPA10109-DPB11001	0.602543	0.2	Strong binder
TNSPRRARSVASQSI	surface_glycoprotein_S1-S2_682-689	7	HLA-DPA10109-DPB110401	0.819212	0.2	Strong binder
TNSPRRARSVASQSI	surface_glycoprotein_S1-S2_682-689	7	HLA-DPA10109-DPB111101	0.819212	0.2	Strong binder
TNSPRRARSVASQSI	surface_glycoprotein_S1-S2_682-689	7	HLA-DPA10109-DPB112401	0.819212	0.2	Strong binder
TNSPRRARSVASQSI	surface_glycoprotein_S1-S2_682-689	7	HLA-DPA10109-DPB113101	0.73566	0.2	Strong binder
TNSPRRARSVASQSI	surface_glycoprotein_S1-S2_682-689	7	HLA-DPA10109-DPB113201	0.778367	0.2	Strong binder
TNSPRRARSVASQSI	surface_glycoprotein_S1-S2_682-689	7	HLA-DPA10109-DPB11701	0.73566	0.2	Strong binder
TNSPRRARSVASQSI	surface_glycoprotein_S1-S2_682-689	7	HLA-DPA10109-DPB12501	0.819212	0.2	Strong binder
TNSPRRARSVASQSI	surface_glycoprotein_S1-S2_682-689	7	HLA-DPA10109-DPB13501	0.778367	0.2	Strong binder
TNSPRRARSVASQSI	surface_glycoprotein_S1-S2_682-689	7	HLA-DPA10109-DPB13701	0.602543	0.2	Strong binder
TNSPRRARSVASQSI	surface_glycoprotein_S1-S2_682-689	7	HLA-DPA10109-DPB14501	0.819212	0.2	Strong binder
TNSPRRARSVASQSI	surface_glycoprotein_S1-S2_682-689	7	HLA-DPA10109-DPB17001	0.819212	0.2	Strong binder
TNSPRRARSVASQSI	surface_glycoprotein_S1-S2_682-689	7	HLA-DPA10109-DPB17601	0.819212	0.2	Strong binder
TNSPRRARSVASQSI	surface_glycoprotein_S1-S2_682-689	7	HLA-DPA10109-DPB17801	0.819212	0.2	Strong binder
TNSPRRARSVASQSI	surface_glycoprotein_S1-S2_682-689	7	HLA-DPA10109-DPB17901	0.778367	0.2	Strong binder
TNSPRRARSVASQSI	surface_glycoprotein_S1-S2_682-689	7	HLA-DPA10109-DPB18801	0.602543	0.2	Strong binder
TNSPRRARSVASQSI	surface_glycoprotein_S1-S2_682-689	7	HLA-DPA10109-DPB19201	0.819212	0.2	Strong binder
TNSPRRARSVASQSI	surface_glycoprotein_S1-S2_682-689	7	HLA-DPA10109-DPB19301	0.73566	0.2	Strong binder
TNSPRRARSVASQSI	surface_glycoprotein_S1-S2_682-689	7	HLA-DPA10110-DPB10301	0.819212	0.2	Strong binder
TNSPRRARSVASQSI	surface_glycoprotein_S1-S2_682-689	7	HLA-DPA10110-DPB11001	0.602543	0.2	Strong binder
TNSPRRARSVASQSI	surface_glycoprotein_S1-S2_682-689	7	HLA-DPA10110-DPB110401	0.819212	0.2	Strong binder
TNSPRRARSVASQSI	surface_glycoprotein_S1-S2_682-689	7	HLA-DPA10110-DPB111101	0.819212	0.2	Strong binder
TNSPRRARSVASQSI	surface_glycoprotein_S1-S2_682-689	7	HLA-DPA10110-DPB112401	0.819212	0.2	Strong binder
TNSPRRARSVASQSI	surface_glycoprotein_S1-S2_682-689	7	HLA-DPA10110-DPB113101	0.73566	0.2	Strong binder
TNSPRRARSVASQSI	surface_glycoprotein_S1-S2_682-689	7	HLA-DPA10110-DPB113201	0.778367	0.2	Strong binder
TNSPRRARSVASQSI	surface_glycoprotein_S1-S2_682-689	7	HLA-DPA10110-DPB11701	0.73566	0.2	Strong binder
TNSPRRARSVASQSI	surface_glycoprotein_S1-S2_682-689	7	HLA-DPA10110-DPB12501	0.819212	0.2	Strong binder
TNSPRRARSVASQSI	surface_glycoprotein_S1-S2_682-689	7	HLA-DPA10110-DPB13501	0.778367	0.2	Strong binder
TNSPRRARSVASQSI	surface_glycoprotein_S1-S2_682-689	7	HLA-DPA10110-DPB13701	0.602543	0.2	Strong binder
TNSPRRARSVASQSI	surface_glycoprotein_S1-S2_682-689	7	HLA-DPA10110-DPB14501	0.819212	0.2	Strong binder
TNSPRRARSVASQSI	surface_glycoprotein_S1-S2_682-689	7	HLA-DPA10110-DPB17001	0.819212	0.2	Strong binder
TNSPRRARSVASQSI	surface_glycoprotein_S1-S2_682-689	7	HLA-DPA10110-DPB17601	0.819212	0.2	Strong binder
TNSPRRARSVASQSI	surface_glycoprotein_S1-S2_682-689	7	HLA-DPA10110-DPB17801	0.819212	0.2	Strong binder
TNSPRRARSVASQSI	surface_glycoprotein_S1-S2_682-689	7	HLA-DPA10110-DPB17901	0.778367	0.2	Strong binder
TNSPRRARSVASQSI	surface_glycoprotein_S1-S2_682-689	7	HLA-DPA10110-DPB18801	0.602543	0.2	Strong binder
TNSPRRARSVASQSI	surface_glycoprotein_S1-S2_682-689	7	HLA-DPA10110-DPB19201	0.819212	0.2	Strong binder
TNSPRRARSVASQSI	surface_glycoprotein_S1-S2_682-689	7	HLA-DPA10110-DPB19301	0.73566	0.2	Strong binder
TNSPRRARSVASQSI	surface_glycoprotein_S1-S2_682-689	7	HLA-DPA10203-DPB10301	0.819212	0.2	Strong binder
TNSPRRARSVASQSI	surface_glycoprotein_S1-S2_682-689	7	HLA-DPA10203-DPB11001	0.602543	0.2	Strong binder
TNSPRRARSVASQSI	surface_glycoprotein_S1-S2_682-689	7	HLA-DPA10203-DPB110401	0.819212	0.2	Strong binder
TNSPRRARSVASQSI	surface_glycoprotein_S1-S2_682-689	7	HLA-DPA10203-DPB111101	0.819212	0.2	Strong binder
TNSPRRARSVASQSI	surface_glycoprotein_S1-S2_682-689	7	HLA-DPA10203-DPB112401	0.819212	0.2	Strong binder
TNSPRRARSVASQSI	surface_glycoprotein_S1-S2_682-689	7	HLA-DPA10203-DPB113101	0.73566	0.2	Strong binder
TNSPRRARSVASQSI	surface_glycoprotein_S1-S2_682-689	7	HLA-DPA10203-DPB113201	0.778367	0.2	Strong binder
TNSPRRARSVASQSI	surface_glycoprotein_S1-S2_682-689	7	HLA-DPA10203-DPB11701	0.73566	0.2	Strong binder
TNSPRRARSVASQSI	surface_glycoprotein_S1-S2_682-689	7	HLA-DPA10203-DPB12501	0.819212	0.2	Strong binder
TNSPRRARSVASQSI	surface_glycoprotein_S1-S2_682-689	7	HLA-DPA10203-DPB13501	0.778367	0.2	Strong binder
TNSPRRARSVASQSI	surface_glycoprotein_S1-S2_682-689	7	HLA-DPA10203-DPB13701	0.602543	0.2	Strong binder
TNSPRRARSVASQSI	surface_glycoprotein_S1-S2_682-689	7	HLA-DPA10203-DPB14501	0.819212	0.2	Strong binder
TNSPRRARSVASQSI	surface_glycoprotein_S1-S2_682-689	7	HLA-DPA10203-DPB17001	0.819212	0.2	Strong binder
TNSPRRARSVASQSI	surface_glycoprotein_S1-S2_682-689	7	HLA-DPA10203-DPB17601	0.819212	0.2	Strong binder
TNSPRRARSVASQSI	surface_glycoprotein_S1-S2_682-689	7	HLA-DPA10203-DPB17801	0.819212	0.2	Strong binder
TNSPRRARSVASQSI	surface_glycoprotein_S1-S2_682-689	7	HLA-DPA10203-DPB17901	0.778367	0.2	Strong binder
TNSPRRARSVASQSI	surface_glycoprotein_S1-S2_682-689	7	HLA-DPA10203-DPB18801	0.602543	0.2	Strong binder
TNSPRRARSVASQSI	surface_glycoprotein_S1-S2_682-689	7	HLA-DPA10203-DPB19201	0.819212	0.2	Strong binder
TNSPRRARSVASQSI	surface_glycoprotein_S1-S2_682-689	7	HLA-DPA10203-DPB19301	0.73566	0.2	Strong binder
SPRRARSVASQSIIA	surface_glycoprotein_S1-S2_682-689	9	HLA-DPA10302-DPB12901	0.570453	0.2	Strong binder
SPRRARSVASQSIIA	surface_glycoprotein_S1-S2_682-689	9	HLA-DPA10302-DPB14401	0.570453	0.2	Strong binder
SPRRARSVASQSIIA	surface_glycoprotein_S1-S2_682-689	9	HLA-DPA10401-DPB10301	0.745386	0.2	Strong binder
SPRRARSVASQSIIA	surface_glycoprotein_S1-S2_682-689	9	HLA-DPA10401-DPB110401	0.745386	0.2	Strong binder
SPRRARSVASQSIIA	surface_glycoprotein_S1-S2_682-689	9	HLA-DPA10401-DPB111101	0.745386	0.2	Strong binder
NSPRRARSVASQSII	surface_glycoprotein_S1-S2_682-689	8	HLA-DPA10401-DPB111901	0.66004	0.2	Strong binder
SPRRARSVASQSIIA	surface_glycoprotein_S1-S2_682-689	9	HLA-DPA10401-DPB112401	0.745386	0.2	Strong binder
TNSPRRARSVASQSI	surface_glycoprotein_S1-S2_682-689	7	HLA-DPA10401-DPB12101	0.649454	0.2	Strong binder
SPRRARSVASQSIIA	surface_glycoprotein_S1-S2_682-689	9	HLA-DPA10401-DPB12501	0.745386	0.2	Strong binder
TNSPRRARSVASQSI	surface_glycoprotein_S1-S2_682-689	7	HLA-DPA10401-DPB13001	0.649454	0.2	Strong binder
SPRRARSVASQSIIA	surface_glycoprotein_S1-S2_682-689	9	HLA-DPA10401-DPB14501	0.745386	0.2	Strong binder
SPRRARSVASQSIIA	surface_glycoprotein_S1-S2_682-689	9	HLA-DPA10401-DPB17001	0.745386	0.2	Strong binder
SPRRARSVASQSIIA	surface_glycoprotein_S1-S2_682-689	9	HLA-DPA10401-DPB17601	0.745386	0.2	Strong binder
SPRRARSVASQSIIA	surface_glycoprotein_S1-S2_682-689	9	HLA-DPA10401-DPB17801	0.745386	0.2	Strong binder
SPRRARSVASQSIIA	surface_glycoprotein_S1-S2_682-689	9	HLA-DPA10401-DPB19201	0.745386	0.2	Strong binder
NPANNAAIVLQLPQG	N_protein_158-164	3	HLA-DQA10101-DQB10610	0.151947	0.2	Strong binder
RNPANNAAIVLQLPQ	N_protein_158-164	2	HLA-DQA10102-DQB10602	0.756932	0.2	Strong binder
RNPANNAAIVLQLPQ	N_protein_158-164	2	HLA-DQA10102-DQB10616	0.756932	0.2	Strong binder
RNPANNAAIVLQLPQ	N_protein_158-164	2	HLA-DQA10102-DQB10619	0.756932	0.2	Strong binder
PANNAAIVLQLPQGT	N_protein_158-164	4	HLA-DQA10103-DQB10637	0.575076	0.2	Strong binder
RNPANNAAIVLQLPQ	N_protein_158-164	2	HLA-DQA10103-DQB10642	0.391116	0.2	Strong binder
NPANNAAIVLQLPQG	N_protein_158-164	3	HLA-DQA10104-DQB10610	0.151947	0.2	Strong binder
NPANNAAIVLQLPQG	N_protein_158-164	3	HLA-DQA10105-DQB10610	0.151947	0.2	Strong binder
RNPANNAAIVLQLPQ	N_protein_158-164	2	HLA-DQA10106-DQB10602	0.756932	0.2	Strong binder
RNPANNAAIVLQLPQ	N_protein_158-164	2	HLA-DQA10106-DQB10616	0.756932	0.2	Strong binder
RNPANNAAIVLQLPQ	N_protein_158-164	2	HLA-DQA10106-DQB10619	0.756932	0.2	Strong binder
NPANNAAIVLQLPQG	N_protein_158-164	3	HLA-DQA10107-DQB10610	0.151947	0.2	Strong binder
RNPANNAAIVLQLPQ	N_protein_158-164	2	HLA-DQA10108-DQB10602	0.756932	0.2	Strong binder
RNPANNAAIVLQLPQ	N_protein_158-164	2	HLA-DQA10108-DQB10616	0.756932	0.2	Strong binder
RNPANNAAIVLQLPQ	N_protein_158-164	2	HLA-DQA10108-DQB10619	0.756932	0.2	Strong binder
RNPANNAAIVLQLPQ	N_protein_158-164	2	HLA-DQA10109-DQB10602	0.756932	0.2	Strong binder
RNPANNAAIVLQLPQ	N_protein_158-164	2	HLA-DQA10109-DQB10616	0.756932	0.2	Strong binder
RNPANNAAIVLQLPQ	N_protein_158-164	2	HLA-DQA10109-DQB10619	0.756932	0.2	Strong binder
SSGWTAGAAAYYVGY	surface_glycoprotein_S1_254-260	12	HLA-DQA10501-DQB10312	0.428866	0.2	Strong binder
SSGWTAGAAAYYVGY	surface_glycoprotein_S1_254-260	12	HLA-DQA10503-DQB10312	0.428866	0.2	Strong binder
SSGWTAGAAAYYVGY	surface_glycoprotein_S1_254-260	12	HLA-DQA10504-DQB10312	0.428866	0.2	Strong binder
SSGWTAGAAAYYVGY	surface_glycoprotein_S1_254-260	12	HLA-DQA10505-DQB10312	0.428866	0.2	Strong binder
SSGWTAGAAAYYVGY	surface_glycoprotein_S1_254-260	12	HLA-DQA10506-DQB10312	0.428866	0.2	Strong binder
SSGWTAGAAAYYVGY	surface_glycoprotein_S1_254-260	12	HLA-DQA10507-DQB10312	0.428866	0.2	Strong binder
SSGWTAGAAAYYVGY	surface_glycoprotein_S1_254-260	12	HLA-DQA10508-DQB10312	0.428866	0.2	Strong binder
SSGWTAGAAAYYVGY	surface_glycoprotein_S1_254-260	12	HLA-DQA10509-DQB10312	0.428866	0.2	Strong binder
SSGWTAGAAAYYVGY	surface_glycoprotein_S1_254-260	12	HLA-DQA10510-DQB10312	0.428866	0.2	Strong binder
SSGWTAGAAAYYVGY	surface_glycoprotein_S1_254-260	12	HLA-DQA10511-DQB10312	0.428866	0.2	Strong binder
SSGWTAGAAAYYVGY	surface_glycoprotein_S1_254-260	12	HLA-DQA10601-DQB10618	0.242883	0.2	Strong binder
SSGWTAGAAAYYVGY	surface_glycoprotein_S1_254-260	12	HLA-DQA10601-DQB10642	0.186133	0.2	Strong binder
SSGWTAGAAAYYVGY	surface_glycoprotein_S1_254-260	12	HLA-DQA10602-DQB10618	0.242883	0.2	Strong binder
SSGWTAGAAAYYVGY	surface_glycoprotein_S1_254-260	12	HLA-DQA10602-DQB10642	0.186133	0.2	Strong binder
NSPRRARSVASQSII	surface_glycoprotein_S1-S2_682-689	8	HLA-DPA10103-DPB111901	0.717166	0.21	Strong binder
NSPRRARSVASQSII	surface_glycoprotein_S1-S2_682-689	8	HLA-DPA10103-DPB113001	0.836081	0.21	Strong binder
SPRRARSVASQSIIA	surface_glycoprotein_S1-S2_682-689	9	HLA-DPA10103-DPB113101	0.73219	0.21	Strong binder
SPRRARSVASQSIIA	surface_glycoprotein_S1-S2_682-689	9	HLA-DPA10103-DPB11701	0.73219	0.21	Strong binder
NSPRRARSVASQSII	surface_glycoprotein_S1-S2_682-689	8	HLA-DPA10103-DPB12001	0.836081	0.21	Strong binder
NSPRRARSVASQSII	surface_glycoprotein_S1-S2_682-689	8	HLA-DPA10103-DPB19101	0.836081	0.21	Strong binder
SPRRARSVASQSIIA	surface_glycoprotein_S1-S2_682-689	9	HLA-DPA10103-DPB19301	0.73219	0.21	Strong binder
NSPRRARSVASQSII	surface_glycoprotein_S1-S2_682-689	8	HLA-DPA10104-DPB111901	0.717166	0.21	Strong binder
NSPRRARSVASQSII	surface_glycoprotein_S1-S2_682-689	8	HLA-DPA10104-DPB113001	0.836081	0.21	Strong binder
SPRRARSVASQSIIA	surface_glycoprotein_S1-S2_682-689	9	HLA-DPA10104-DPB113101	0.73219	0.21	Strong binder
SPRRARSVASQSIIA	surface_glycoprotein_S1-S2_682-689	9	HLA-DPA10104-DPB11701	0.73219	0.21	Strong binder
NSPRRARSVASQSII	surface_glycoprotein_S1-S2_682-689	8	HLA-DPA10104-DPB12001	0.836081	0.21	Strong binder
NSPRRARSVASQSII	surface_glycoprotein_S1-S2_682-689	8	HLA-DPA10104-DPB19101	0.836081	0.21	Strong binder
SPRRARSVASQSIIA	surface_glycoprotein_S1-S2_682-689	9	HLA-DPA10104-DPB19301	0.73219	0.21	Strong binder
NSPRRARSVASQSII	surface_glycoprotein_S1-S2_682-689	8	HLA-DPA10105-DPB111901	0.717166	0.21	Strong binder
NSPRRARSVASQSII	surface_glycoprotein_S1-S2_682-689	8	HLA-DPA10105-DPB113001	0.836081	0.21	Strong binder
SPRRARSVASQSIIA	surface_glycoprotein_S1-S2_682-689	9	HLA-DPA10105-DPB113101	0.73219	0.21	Strong binder
SPRRARSVASQSIIA	surface_glycoprotein_S1-S2_682-689	9	HLA-DPA10105-DPB11701	0.73219	0.21	Strong binder
NSPRRARSVASQSII	surface_glycoprotein_S1-S2_682-689	8	HLA-DPA10105-DPB12001	0.836081	0.21	Strong binder
NSPRRARSVASQSII	surface_glycoprotein_S1-S2_682-689	8	HLA-DPA10105-DPB19101	0.836081	0.21	Strong binder
SPRRARSVASQSIIA	surface_glycoprotein_S1-S2_682-689	9	HLA-DPA10105-DPB19301	0.73219	0.21	Strong binder
NSPRRARSVASQSII	surface_glycoprotein_S1-S2_682-689	8	HLA-DPA10107-DPB111901	0.717166	0.21	Strong binder
NSPRRARSVASQSII	surface_glycoprotein_S1-S2_682-689	8	HLA-DPA10107-DPB113001	0.836081	0.21	Strong binder
SPRRARSVASQSIIA	surface_glycoprotein_S1-S2_682-689	9	HLA-DPA10107-DPB113101	0.73219	0.21	Strong binder
SPRRARSVASQSIIA	surface_glycoprotein_S1-S2_682-689	9	HLA-DPA10107-DPB11701	0.73219	0.21	Strong binder
NSPRRARSVASQSII	surface_glycoprotein_S1-S2_682-689	8	HLA-DPA10107-DPB12001	0.836081	0.21	Strong binder
NSPRRARSVASQSII	surface_glycoprotein_S1-S2_682-689	8	HLA-DPA10107-DPB19101	0.836081	0.21	Strong binder
SPRRARSVASQSIIA	surface_glycoprotein_S1-S2_682-689	9	HLA-DPA10107-DPB19301	0.73219	0.21	Strong binder
NSPRRARSVASQSII	surface_glycoprotein_S1-S2_682-689	8	HLA-DPA10108-DPB111901	0.717166	0.21	Strong binder
NSPRRARSVASQSII	surface_glycoprotein_S1-S2_682-689	8	HLA-DPA10108-DPB113001	0.836081	0.21	Strong binder
SPRRARSVASQSIIA	surface_glycoprotein_S1-S2_682-689	9	HLA-DPA10108-DPB113101	0.73219	0.21	Strong binder
SPRRARSVASQSIIA	surface_glycoprotein_S1-S2_682-689	9	HLA-DPA10108-DPB11701	0.73219	0.21	Strong binder
NSPRRARSVASQSII	surface_glycoprotein_S1-S2_682-689	8	HLA-DPA10108-DPB12001	0.836081	0.21	Strong binder
NSPRRARSVASQSII	surface_glycoprotein_S1-S2_682-689	8	HLA-DPA10108-DPB19101	0.836081	0.21	Strong binder
SPRRARSVASQSIIA	surface_glycoprotein_S1-S2_682-689	9	HLA-DPA10108-DPB19301	0.73219	0.21	Strong binder
NSPRRARSVASQSII	surface_glycoprotein_S1-S2_682-689	8	HLA-DPA10109-DPB111901	0.717166	0.21	Strong binder
NSPRRARSVASQSII	surface_glycoprotein_S1-S2_682-689	8	HLA-DPA10109-DPB113001	0.836081	0.21	Strong binder
SPRRARSVASQSIIA	surface_glycoprotein_S1-S2_682-689	9	HLA-DPA10109-DPB113101	0.73219	0.21	Strong binder
SPRRARSVASQSIIA	surface_glycoprotein_S1-S2_682-689	9	HLA-DPA10109-DPB11701	0.73219	0.21	Strong binder
NSPRRARSVASQSII	surface_glycoprotein_S1-S2_682-689	8	HLA-DPA10109-DPB12001	0.836081	0.21	Strong binder
NSPRRARSVASQSII	surface_glycoprotein_S1-S2_682-689	8	HLA-DPA10109-DPB19101	0.836081	0.21	Strong binder
SPRRARSVASQSIIA	surface_glycoprotein_S1-S2_682-689	9	HLA-DPA10109-DPB19301	0.73219	0.21	Strong binder
NSPRRARSVASQSII	surface_glycoprotein_S1-S2_682-689	8	HLA-DPA10110-DPB111901	0.717166	0.21	Strong binder
NSPRRARSVASQSII	surface_glycoprotein_S1-S2_682-689	8	HLA-DPA10110-DPB113001	0.836081	0.21	Strong binder
SPRRARSVASQSIIA	surface_glycoprotein_S1-S2_682-689	9	HLA-DPA10110-DPB113101	0.73219	0.21	Strong binder
SPRRARSVASQSIIA	surface_glycoprotein_S1-S2_682-689	9	HLA-DPA10110-DPB11701	0.73219	0.21	Strong binder
NSPRRARSVASQSII	surface_glycoprotein_S1-S2_682-689	8	HLA-DPA10110-DPB12001	0.836081	0.21	Strong binder
NSPRRARSVASQSII	surface_glycoprotein_S1-S2_682-689	8	HLA-DPA10110-DPB19101	0.836081	0.21	Strong binder
SPRRARSVASQSIIA	surface_glycoprotein_S1-S2_682-689	9	HLA-DPA10110-DPB19301	0.73219	0.21	Strong binder
NSPRRARSVASQSII	surface_glycoprotein_S1-S2_682-689	8	HLA-DPA10203-DPB111901	0.717166	0.21	Strong binder
NSPRRARSVASQSII	surface_glycoprotein_S1-S2_682-689	8	HLA-DPA10203-DPB113001	0.836081	0.21	Strong binder
SPRRARSVASQSIIA	surface_glycoprotein_S1-S2_682-689	9	HLA-DPA10203-DPB113101	0.73219	0.21	Strong binder
SPRRARSVASQSIIA	surface_glycoprotein_S1-S2_682-689	9	HLA-DPA10203-DPB11701	0.73219	0.21	Strong binder
NSPRRARSVASQSII	surface_glycoprotein_S1-S2_682-689	8	HLA-DPA10203-DPB12001	0.836081	0.21	Strong binder
NSPRRARSVASQSII	surface_glycoprotein_S1-S2_682-689	8	HLA-DPA10203-DPB19101	0.836081	0.21	Strong binder
SPRRARSVASQSIIA	surface_glycoprotein_S1-S2_682-689	9	HLA-DPA10203-DPB19301	0.73219	0.21	Strong binder
NSPRRARSVASQSII	surface_glycoprotein_S1-S2_682-689	8	HLA-DPA10302-DPB10301	0.683682	0.21	Strong binder
SPRRARSVASQSIIA	surface_glycoprotein_S1-S2_682-689	9	HLA-DPA10302-DPB10601	0.663428	0.21	Strong binder
NSPRRARSVASQSII	surface_glycoprotein_S1-S2_682-689	8	HLA-DPA10302-DPB110401	0.683682	0.21	Strong binder
NSPRRARSVASQSII	surface_glycoprotein_S1-S2_682-689	8	HLA-DPA10302-DPB111101	0.683682	0.21	Strong binder
NSPRRARSVASQSII	surface_glycoprotein_S1-S2_682-689	8	HLA-DPA10302-DPB112401	0.683682	0.21	Strong binder
NSPRRARSVASQSII	surface_glycoprotein_S1-S2_682-689	8	HLA-DPA10302-DPB113201	0.657453	0.21	Strong binder
NSPRRARSVASQSII	surface_glycoprotein_S1-S2_682-689	8	HLA-DPA10302-DPB12501	0.683682	0.21	Strong binder
NSPRRARSVASQSII	surface_glycoprotein_S1-S2_682-689	8	HLA-DPA10302-DPB13501	0.657453	0.21	Strong binder
NSPRRARSVASQSII	surface_glycoprotein_S1-S2_682-689	8	HLA-DPA10302-DPB14501	0.683682	0.21	Strong binder
NSPRRARSVASQSII	surface_glycoprotein_S1-S2_682-689	8	HLA-DPA10302-DPB17001	0.683682	0.21	Strong binder
NSPRRARSVASQSII	surface_glycoprotein_S1-S2_682-689	8	HLA-DPA10302-DPB17601	0.683682	0.21	Strong binder
NSPRRARSVASQSII	surface_glycoprotein_S1-S2_682-689	8	HLA-DPA10302-DPB17801	0.683682	0.21	Strong binder
NSPRRARSVASQSII	surface_glycoprotein_S1-S2_682-689	8	HLA-DPA10302-DPB17901	0.657453	0.21	Strong binder
NSPRRARSVASQSII	surface_glycoprotein_S1-S2_682-689	8	HLA-DPA10302-DPB19201	0.683682	0.21	Strong binder
TNSPRRARSVASQSI	surface_glycoprotein_S1-S2_682-689	7	HLA-DPA10401-DPB10301	0.741152	0.21	Strong binder
TNSPRRARSVASQSI	surface_glycoprotein_S1-S2_682-689	7	HLA-DPA10401-DPB110401	0.741152	0.21	Strong binder
TNSPRRARSVASQSI	surface_glycoprotein_S1-S2_682-689	7	HLA-DPA10401-DPB111101	0.741152	0.21	Strong binder
TNSPRRARSVASQSI	surface_glycoprotein_S1-S2_682-689	7	HLA-DPA10401-DPB112401	0.741152	0.21	Strong binder
TNSPRRARSVASQSI	surface_glycoprotein_S1-S2_682-689	7	HLA-DPA10401-DPB113201	0.709268	0.21	Strong binder
TNSPRRARSVASQSI	surface_glycoprotein_S1-S2_682-689	7	HLA-DPA10401-DPB12501	0.741152	0.21	Strong binder
TNSPRRARSVASQSI	surface_glycoprotein_S1-S2_682-689	7	HLA-DPA10401-DPB13501	0.709268	0.21	Strong binder
TNSPRRARSVASQSI	surface_glycoprotein_S1-S2_682-689	7	HLA-DPA10401-DPB14501	0.741152	0.21	Strong binder
TNSPRRARSVASQSI	surface_glycoprotein_S1-S2_682-689	7	HLA-DPA10401-DPB17001	0.741152	0.21	Strong binder
TNSPRRARSVASQSI	surface_glycoprotein_S1-S2_682-689	7	HLA-DPA10401-DPB17601	0.741152	0.21	Strong binder
TNSPRRARSVASQSI	surface_glycoprotein_S1-S2_682-689	7	HLA-DPA10401-DPB17801	0.741152	0.21	Strong binder
TNSPRRARSVASQSI	surface_glycoprotein_S1-S2_682-689	7	HLA-DPA10401-DPB17901	0.709268	0.21	Strong binder
TNSPRRARSVASQSI	surface_glycoprotein_S1-S2_682-689	7	HLA-DPA10401-DPB19201	0.741152	0.21	Strong binder
RNPANNAAIVLQLPQ	N_protein_158-164	2	HLA-DQA10101-DQB10602	0.285355	0.21	Strong binder
RNPANNAAIVLQLPQ	N_protein_158-164	2	HLA-DQA10101-DQB10616	0.285355	0.21	Strong binder
RNPANNAAIVLQLPQ	N_protein_158-164	2	HLA-DQA10101-DQB10619	0.285355	0.21	Strong binder
RNPANNAAIVLQLPQ	N_protein_158-164	2	HLA-DQA10101-DQB10624	0.258596	0.21	Strong binder
RNPANNAAIVLQLPQ	N_protein_158-164	2	HLA-DQA10103-DQB10612	0.395138	0.21	Strong binder
RNPANNAAIVLQLPQ	N_protein_158-164	2	HLA-DQA10104-DQB10602	0.285355	0.21	Strong binder
RNPANNAAIVLQLPQ	N_protein_158-164	2	HLA-DQA10104-DQB10616	0.285355	0.21	Strong binder
RNPANNAAIVLQLPQ	N_protein_158-164	2	HLA-DQA10104-DQB10619	0.285355	0.21	Strong binder
RNPANNAAIVLQLPQ	N_protein_158-164	2	HLA-DQA10104-DQB10624	0.258596	0.21	Strong binder
RNPANNAAIVLQLPQ	N_protein_158-164	2	HLA-DQA10105-DQB10602	0.285355	0.21	Strong binder
RNPANNAAIVLQLPQ	N_protein_158-164	2	HLA-DQA10105-DQB10616	0.285355	0.21	Strong binder
RNPANNAAIVLQLPQ	N_protein_158-164	2	HLA-DQA10105-DQB10619	0.285355	0.21	Strong binder
RNPANNAAIVLQLPQ	N_protein_158-164	2	HLA-DQA10105-DQB10624	0.258596	0.21	Strong binder
RNPANNAAIVLQLPQ	N_protein_158-164	2	HLA-DQA10107-DQB10602	0.285355	0.21	Strong binder
RNPANNAAIVLQLPQ	N_protein_158-164	2	HLA-DQA10107-DQB10616	0.285355	0.21	Strong binder
RNPANNAAIVLQLPQ	N_protein_158-164	2	HLA-DQA10107-DQB10619	0.285355	0.21	Strong binder
RNPANNAAIVLQLPQ	N_protein_158-164	2	HLA-DQA10107-DQB10624	0.258596	0.21	Strong binder
SSSGWTAGAAAYYVG	surface_glycoprotein_S1_254-260	11	HLA-DQA10401-DQB10612	0.176044	0.21	Strong binder
SSSGWTAGAAAYYVG	surface_glycoprotein_S1_254-260	11	HLA-DQA10402-DQB10612	0.176044	0.21	Strong binder
SSSGWTAGAAAYYVG	surface_glycoprotein_S1_254-260	11	HLA-DQA10404-DQB10612	0.176044	0.21	Strong binder
SGWTAGAAAYYVGYL	surface_glycoprotein_S1_254-260	13	HLA-DQA10601-DQB10304	0.445859	0.21	Strong binder
SGWTAGAAAYYVGYL	surface_glycoprotein_S1_254-260	13	HLA-DQA10601-DQB10314	0.445859	0.21	Strong binder
SSGWTAGAAAYYVGY	surface_glycoprotein_S1_254-260	12	HLA-DQA10601-DQB10317	0.235712	0.21	Strong binder
SGWTAGAAAYYVGYL	surface_glycoprotein_S1_254-260	13	HLA-DQA10602-DQB10304	0.445859	0.21	Strong binder
SGWTAGAAAYYVGYL	surface_glycoprotein_S1_254-260	13	HLA-DQA10602-DQB10314	0.445859	0.21	Strong binder
SSGWTAGAAAYYVGY	surface_glycoprotein_S1_254-260	12	HLA-DQA10602-DQB10317	0.235712	0.21	Strong binder
SPRRARSVASQSIIA	surface_glycoprotein_S1-S2_682-689	9	HLA-DPA10103-DPB10301	0.81285	0.22	Strong binder
SPRRARSVASQSIIA	surface_glycoprotein_S1-S2_682-689	9	HLA-DPA10103-DPB11001	0.593355	0.22	Strong binder
SPRRARSVASQSIIA	surface_glycoprotein_S1-S2_682-689	9	HLA-DPA10103-DPB110401	0.81285	0.22	Strong binder
SPRRARSVASQSIIA	surface_glycoprotein_S1-S2_682-689	9	HLA-DPA10103-DPB111101	0.81285	0.22	Strong binder
SPRRARSVASQSIIA	surface_glycoprotein_S1-S2_682-689	9	HLA-DPA10103-DPB112401	0.81285	0.22	Strong binder
SPRRARSVASQSIIA	surface_glycoprotein_S1-S2_682-689	9	HLA-DPA10103-DPB12501	0.81285	0.22	Strong binder
SPRRARSVASQSIIA	surface_glycoprotein_S1-S2_682-689	9	HLA-DPA10103-DPB13701	0.593355	0.22	Strong binder
SPRRARSVASQSIIA	surface_glycoprotein_S1-S2_682-689	9	HLA-DPA10103-DPB14501	0.81285	0.22	Strong binder
SPRRARSVASQSIIA	surface_glycoprotein_S1-S2_682-689	9	HLA-DPA10103-DPB17001	0.81285	0.22	Strong binder
SPRRARSVASQSIIA	surface_glycoprotein_S1-S2_682-689	9	HLA-DPA10103-DPB17601	0.81285	0.22	Strong binder
SPRRARSVASQSIIA	surface_glycoprotein_S1-S2_682-689	9	HLA-DPA10103-DPB17801	0.81285	0.22	Strong binder
SPRRARSVASQSIIA	surface_glycoprotein_S1-S2_682-689	9	HLA-DPA10103-DPB18801	0.593355	0.22	Strong binder
SPRRARSVASQSIIA	surface_glycoprotein_S1-S2_682-689	9	HLA-DPA10103-DPB19201	0.81285	0.22	Strong binder
SPRRARSVASQSIIA	surface_glycoprotein_S1-S2_682-689	9	HLA-DPA10104-DPB10301	0.81285	0.22	Strong binder
SPRRARSVASQSIIA	surface_glycoprotein_S1-S2_682-689	9	HLA-DPA10104-DPB11001	0.593355	0.22	Strong binder
SPRRARSVASQSIIA	surface_glycoprotein_S1-S2_682-689	9	HLA-DPA10104-DPB110401	0.81285	0.22	Strong binder
SPRRARSVASQSIIA	surface_glycoprotein_S1-S2_682-689	9	HLA-DPA10104-DPB111101	0.81285	0.22	Strong binder
SPRRARSVASQSIIA	surface_glycoprotein_S1-S2_682-689	9	HLA-DPA10104-DPB112401	0.81285	0.22	Strong binder
SPRRARSVASQSIIA	surface_glycoprotein_S1-S2_682-689	9	HLA-DPA10104-DPB12501	0.81285	0.22	Strong binder
SPRRARSVASQSIIA	surface_glycoprotein_S1-S2_682-689	9	HLA-DPA10104-DPB13701	0.593355	0.22	Strong binder
SPRRARSVASQSIIA	surface_glycoprotein_S1-S2_682-689	9	HLA-DPA10104-DPB14501	0.81285	0.22	Strong binder
SPRRARSVASQSIIA	surface_glycoprotein_S1-S2_682-689	9	HLA-DPA10104-DPB17001	0.81285	0.22	Strong binder
SPRRARSVASQSIIA	surface_glycoprotein_S1-S2_682-689	9	HLA-DPA10104-DPB17601	0.81285	0.22	Strong binder
SPRRARSVASQSIIA	surface_glycoprotein_S1-S2_682-689	9	HLA-DPA10104-DPB17801	0.81285	0.22	Strong binder
SPRRARSVASQSIIA	surface_glycoprotein_S1-S2_682-689	9	HLA-DPA10104-DPB18801	0.593355	0.22	Strong binder
SPRRARSVASQSIIA	surface_glycoprotein_S1-S2_682-689	9	HLA-DPA10104-DPB19201	0.81285	0.22	Strong binder
SPRRARSVASQSIIA	surface_glycoprotein_S1-S2_682-689	9	HLA-DPA10105-DPB10301	0.81285	0.22	Strong binder
SPRRARSVASQSIIA	surface_glycoprotein_S1-S2_682-689	9	HLA-DPA10105-DPB11001	0.593355	0.22	Strong binder
SPRRARSVASQSIIA	surface_glycoprotein_S1-S2_682-689	9	HLA-DPA10105-DPB110401	0.81285	0.22	Strong binder
SPRRARSVASQSIIA	surface_glycoprotein_S1-S2_682-689	9	HLA-DPA10105-DPB111101	0.81285	0.22	Strong binder
SPRRARSVASQSIIA	surface_glycoprotein_S1-S2_682-689	9	HLA-DPA10105-DPB112401	0.81285	0.22	Strong binder
SPRRARSVASQSIIA	surface_glycoprotein_S1-S2_682-689	9	HLA-DPA10105-DPB12501	0.81285	0.22	Strong binder
SPRRARSVASQSIIA	surface_glycoprotein_S1-S2_682-689	9	HLA-DPA10105-DPB13701	0.593355	0.22	Strong binder
SPRRARSVASQSIIA	surface_glycoprotein_S1-S2_682-689	9	HLA-DPA10105-DPB14501	0.81285	0.22	Strong binder
SPRRARSVASQSIIA	surface_glycoprotein_S1-S2_682-689	9	HLA-DPA10105-DPB17001	0.81285	0.22	Strong binder
SPRRARSVASQSIIA	surface_glycoprotein_S1-S2_682-689	9	HLA-DPA10105-DPB17601	0.81285	0.22	Strong binder
SPRRARSVASQSIIA	surface_glycoprotein_S1-S2_682-689	9	HLA-DPA10105-DPB17801	0.81285	0.22	Strong binder
SPRRARSVASQSIIA	surface_glycoprotein_S1-S2_682-689	9	HLA-DPA10105-DPB18801	0.593355	0.22	Strong binder
SPRRARSVASQSIIA	surface_glycoprotein_S1-S2_682-689	9	HLA-DPA10105-DPB19201	0.81285	0.22	Strong binder
SPRRARSVASQSIIA	surface_glycoprotein_S1-S2_682-689	9	HLA-DPA10107-DPB10301	0.81285	0.22	Strong binder
SPRRARSVASQSIIA	surface_glycoprotein_S1-S2_682-689	9	HLA-DPA10107-DPB11001	0.593355	0.22	Strong binder
SPRRARSVASQSIIA	surface_glycoprotein_S1-S2_682-689	9	HLA-DPA10107-DPB110401	0.81285	0.22	Strong binder
SPRRARSVASQSIIA	surface_glycoprotein_S1-S2_682-689	9	HLA-DPA10107-DPB111101	0.81285	0.22	Strong binder
SPRRARSVASQSIIA	surface_glycoprotein_S1-S2_682-689	9	HLA-DPA10107-DPB112401	0.81285	0.22	Strong binder
SPRRARSVASQSIIA	surface_glycoprotein_S1-S2_682-689	9	HLA-DPA10107-DPB12501	0.81285	0.22	Strong binder
SPRRARSVASQSIIA	surface_glycoprotein_S1-S2_682-689	9	HLA-DPA10107-DPB13701	0.593355	0.22	Strong binder
SPRRARSVASQSIIA	surface_glycoprotein_S1-S2_682-689	9	HLA-DPA10107-DPB14501	0.81285	0.22	Strong binder
SPRRARSVASQSIIA	surface_glycoprotein_S1-S2_682-689	9	HLA-DPA10107-DPB17001	0.81285	0.22	Strong binder
SPRRARSVASQSIIA	surface_glycoprotein_S1-S2_682-689	9	HLA-DPA10107-DPB17601	0.81285	0.22	Strong binder
SPRRARSVASQSIIA	surface_glycoprotein_S1-S2_682-689	9	HLA-DPA10107-DPB17801	0.81285	0.22	Strong binder
SPRRARSVASQSIIA	surface_glycoprotein_S1-S2_682-689	9	HLA-DPA10107-DPB18801	0.593355	0.22	Strong binder
SPRRARSVASQSIIA	surface_glycoprotein_S1-S2_682-689	9	HLA-DPA10107-DPB19201	0.81285	0.22	Strong binder
SPRRARSVASQSIIA	surface_glycoprotein_S1-S2_682-689	9	HLA-DPA10108-DPB10301	0.81285	0.22	Strong binder
SPRRARSVASQSIIA	surface_glycoprotein_S1-S2_682-689	9	HLA-DPA10108-DPB11001	0.593355	0.22	Strong binder
SPRRARSVASQSIIA	surface_glycoprotein_S1-S2_682-689	9	HLA-DPA10108-DPB110401	0.81285	0.22	Strong binder
SPRRARSVASQSIIA	surface_glycoprotein_S1-S2_682-689	9	HLA-DPA10108-DPB111101	0.81285	0.22	Strong binder
SPRRARSVASQSIIA	surface_glycoprotein_S1-S2_682-689	9	HLA-DPA10108-DPB112401	0.81285	0.22	Strong binder
SPRRARSVASQSIIA	surface_glycoprotein_S1-S2_682-689	9	HLA-DPA10108-DPB12501	0.81285	0.22	Strong binder
SPRRARSVASQSIIA	surface_glycoprotein_S1-S2_682-689	9	HLA-DPA10108-DPB13701	0.593355	0.22	Strong binder
SPRRARSVASQSIIA	surface_glycoprotein_S1-S2_682-689	9	HLA-DPA10108-DPB14501	0.81285	0.22	Strong binder
SPRRARSVASQSIIA	surface_glycoprotein_S1-S2_682-689	9	HLA-DPA10108-DPB17001	0.81285	0.22	Strong binder
SPRRARSVASQSIIA	surface_glycoprotein_S1-S2_682-689	9	HLA-DPA10108-DPB17601	0.81285	0.22	Strong binder
SPRRARSVASQSIIA	surface_glycoprotein_S1-S2_682-689	9	HLA-DPA10108-DPB17801	0.81285	0.22	Strong binder
SPRRARSVASQSIIA	surface_glycoprotein_S1-S2_682-689	9	HLA-DPA10108-DPB18801	0.593355	0.22	Strong binder
SPRRARSVASQSIIA	surface_glycoprotein_S1-S2_682-689	9	HLA-DPA10108-DPB19201	0.81285	0.22	Strong binder
SPRRARSVASQSIIA	surface_glycoprotein_S1-S2_682-689	9	HLA-DPA10109-DPB10301	0.81285	0.22	Strong binder
SPRRARSVASQSIIA	surface_glycoprotein_S1-S2_682-689	9	HLA-DPA10109-DPB11001	0.593355	0.22	Strong binder
SPRRARSVASQSIIA	surface_glycoprotein_S1-S2_682-689	9	HLA-DPA10109-DPB110401	0.81285	0.22	Strong binder
SPRRARSVASQSIIA	surface_glycoprotein_S1-S2_682-689	9	HLA-DPA10109-DPB111101	0.81285	0.22	Strong binder
SPRRARSVASQSIIA	surface_glycoprotein_S1-S2_682-689	9	HLA-DPA10109-DPB112401	0.81285	0.22	Strong binder
SPRRARSVASQSIIA	surface_glycoprotein_S1-S2_682-689	9	HLA-DPA10109-DPB12501	0.81285	0.22	Strong binder
SPRRARSVASQSIIA	surface_glycoprotein_S1-S2_682-689	9	HLA-DPA10109-DPB13701	0.593355	0.22	Strong binder
SPRRARSVASQSIIA	surface_glycoprotein_S1-S2_682-689	9	HLA-DPA10109-DPB14501	0.81285	0.22	Strong binder
SPRRARSVASQSIIA	surface_glycoprotein_S1-S2_682-689	9	HLA-DPA10109-DPB17001	0.81285	0.22	Strong binder
SPRRARSVASQSIIA	surface_glycoprotein_S1-S2_682-689	9	HLA-DPA10109-DPB17601	0.81285	0.22	Strong binder
SPRRARSVASQSIIA	surface_glycoprotein_S1-S2_682-689	9	HLA-DPA10109-DPB17801	0.81285	0.22	Strong binder
SPRRARSVASQSIIA	surface_glycoprotein_S1-S2_682-689	9	HLA-DPA10109-DPB18801	0.593355	0.22	Strong binder
SPRRARSVASQSIIA	surface_glycoprotein_S1-S2_682-689	9	HLA-DPA10109-DPB19201	0.81285	0.22	Strong binder
SPRRARSVASQSIIA	surface_glycoprotein_S1-S2_682-689	9	HLA-DPA10110-DPB10301	0.81285	0.22	Strong binder
SPRRARSVASQSIIA	surface_glycoprotein_S1-S2_682-689	9	HLA-DPA10110-DPB11001	0.593355	0.22	Strong binder
SPRRARSVASQSIIA	surface_glycoprotein_S1-S2_682-689	9	HLA-DPA10110-DPB110401	0.81285	0.22	Strong binder
SPRRARSVASQSIIA	surface_glycoprotein_S1-S2_682-689	9	HLA-DPA10110-DPB111101	0.81285	0.22	Strong binder
SPRRARSVASQSIIA	surface_glycoprotein_S1-S2_682-689	9	HLA-DPA10110-DPB112401	0.81285	0.22	Strong binder
SPRRARSVASQSIIA	surface_glycoprotein_S1-S2_682-689	9	HLA-DPA10110-DPB12501	0.81285	0.22	Strong binder
SPRRARSVASQSIIA	surface_glycoprotein_S1-S2_682-689	9	HLA-DPA10110-DPB13701	0.593355	0.22	Strong binder
SPRRARSVASQSIIA	surface_glycoprotein_S1-S2_682-689	9	HLA-DPA10110-DPB14501	0.81285	0.22	Strong binder
SPRRARSVASQSIIA	surface_glycoprotein_S1-S2_682-689	9	HLA-DPA10110-DPB17001	0.81285	0.22	Strong binder
SPRRARSVASQSIIA	surface_glycoprotein_S1-S2_682-689	9	HLA-DPA10110-DPB17601	0.81285	0.22	Strong binder
SPRRARSVASQSIIA	surface_glycoprotein_S1-S2_682-689	9	HLA-DPA10110-DPB17801	0.81285	0.22	Strong binder
SPRRARSVASQSIIA	surface_glycoprotein_S1-S2_682-689	9	HLA-DPA10110-DPB18801	0.593355	0.22	Strong binder
SPRRARSVASQSIIA	surface_glycoprotein_S1-S2_682-689	9	HLA-DPA10110-DPB19201	0.81285	0.22	Strong binder
SPRRARSVASQSIIA	surface_glycoprotein_S1-S2_682-689	9	HLA-DPA10203-DPB10301	0.81285	0.22	Strong binder
SPRRARSVASQSIIA	surface_glycoprotein_S1-S2_682-689	9	HLA-DPA10203-DPB11001	0.593355	0.22	Strong binder
SPRRARSVASQSIIA	surface_glycoprotein_S1-S2_682-689	9	HLA-DPA10203-DPB110401	0.81285	0.22	Strong binder
SPRRARSVASQSIIA	surface_glycoprotein_S1-S2_682-689	9	HLA-DPA10203-DPB111101	0.81285	0.22	Strong binder
SPRRARSVASQSIIA	surface_glycoprotein_S1-S2_682-689	9	HLA-DPA10203-DPB112401	0.81285	0.22	Strong binder
SPRRARSVASQSIIA	surface_glycoprotein_S1-S2_682-689	9	HLA-DPA10203-DPB12501	0.81285	0.22	Strong binder
SPRRARSVASQSIIA	surface_glycoprotein_S1-S2_682-689	9	HLA-DPA10203-DPB13701	0.593355	0.22	Strong binder
SPRRARSVASQSIIA	surface_glycoprotein_S1-S2_682-689	9	HLA-DPA10203-DPB14501	0.81285	0.22	Strong binder
SPRRARSVASQSIIA	surface_glycoprotein_S1-S2_682-689	9	HLA-DPA10203-DPB17001	0.81285	0.22	Strong binder
SPRRARSVASQSIIA	surface_glycoprotein_S1-S2_682-689	9	HLA-DPA10203-DPB17601	0.81285	0.22	Strong binder
SPRRARSVASQSIIA	surface_glycoprotein_S1-S2_682-689	9	HLA-DPA10203-DPB17801	0.81285	0.22	Strong binder
SPRRARSVASQSIIA	surface_glycoprotein_S1-S2_682-689	9	HLA-DPA10203-DPB18801	0.593355	0.22	Strong binder
SPRRARSVASQSIIA	surface_glycoprotein_S1-S2_682-689	9	HLA-DPA10203-DPB19201	0.81285	0.22	Strong binder
NSPRRARSVASQSII	surface_glycoprotein_S1-S2_682-689	8	HLA-DPA10302-DPB11001	0.526371	0.22	Strong binder
TNSPRRARSVASQSI	surface_glycoprotein_S1-S2_682-689	7	HLA-DPA10302-DPB12901	0.561946	0.22	Strong binder
NSPRRARSVASQSII	surface_glycoprotein_S1-S2_682-689	8	HLA-DPA10302-DPB13701	0.526371	0.22	Strong binder
TNSPRRARSVASQSI	surface_glycoprotein_S1-S2_682-689	7	HLA-DPA10302-DPB14401	0.561946	0.22	Strong binder
NSPRRARSVASQSII	surface_glycoprotein_S1-S2_682-689	8	HLA-DPA10302-DPB18801	0.526371	0.22	Strong binder
NSPRRARSVASQSII	surface_glycoprotein_S1-S2_682-689	8	HLA-DPA10401-DPB111401	0.685617	0.22	Strong binder
TNSPRRARSVASQSI	surface_glycoprotein_S1-S2_682-689	7	HLA-DPA10401-DPB113001	0.769347	0.22	Strong binder
SPRRARSVASQSIIA	surface_glycoprotein_S1-S2_682-689	9	HLA-DPA10401-DPB113201	0.707724	0.22	Strong binder
TNSPRRARSVASQSI	surface_glycoprotein_S1-S2_682-689	7	HLA-DPA10401-DPB12001	0.769347	0.22	Strong binder
SPRRARSVASQSIIA	surface_glycoprotein_S1-S2_682-689	9	HLA-DPA10401-DPB13501	0.707724	0.22	Strong binder
SPRRARSVASQSIIA	surface_glycoprotein_S1-S2_682-689	9	HLA-DPA10401-DPB15401	0.532425	0.22	Strong binder
SPRRARSVASQSIIA	surface_glycoprotein_S1-S2_682-689	9	HLA-DPA10401-DPB17901	0.707724	0.22	Strong binder
TNSPRRARSVASQSI	surface_glycoprotein_S1-S2_682-689	7	HLA-DPA10401-DPB19101	0.769347	0.22	Strong binder
PANNAAIVLQLPQGT	N_protein_158-164	4	HLA-DQA10101-DQB10633	0.242352	0.22	Strong binder
RNPANNAAIVLQLPQ	N_protein_158-164	2	HLA-DQA10102-DQB10622	0.428437	0.22	Strong binder
RNPANNAAIVLQLPQ	N_protein_158-164	2	HLA-DQA10102-DQB10624	0.712872	0.22	Strong binder
PANNAAIVLQLPQGT	N_protein_158-164	4	HLA-DQA10103-DQB10624	0.668109	0.22	Strong binder
PANNAAIVLQLPQGT	N_protein_158-164	4	HLA-DQA10104-DQB10633	0.242352	0.22	Strong binder
PANNAAIVLQLPQGT	N_protein_158-164	4	HLA-DQA10105-DQB10633	0.242352	0.22	Strong binder
RNPANNAAIVLQLPQ	N_protein_158-164	2	HLA-DQA10106-DQB10622	0.428437	0.22	Strong binder
RNPANNAAIVLQLPQ	N_protein_158-164	2	HLA-DQA10106-DQB10624	0.712872	0.22	Strong binder
PANNAAIVLQLPQGT	N_protein_158-164	4	HLA-DQA10107-DQB10633	0.242352	0.22	Strong binder
RNPANNAAIVLQLPQ	N_protein_158-164	2	HLA-DQA10108-DQB10622	0.428437	0.22	Strong binder
RNPANNAAIVLQLPQ	N_protein_158-164	2	HLA-DQA10108-DQB10624	0.712872	0.22	Strong binder
RNPANNAAIVLQLPQ	N_protein_158-164	2	HLA-DQA10109-DQB10622	0.428437	0.22	Strong binder
RNPANNAAIVLQLPQ	N_protein_158-164	2	HLA-DQA10109-DQB10624	0.712872	0.22	Strong binder
SSGWTAGAAAYYVGY	surface_glycoprotein_S1_254-260	12	HLA-DQA10201-DQB10203	0.680572	0.22	Strong binder
SSGWTAGAAAYYVGY	surface_glycoprotein_S1_254-260	12	HLA-DQA10401-DQB10308	0.088583	0.22	Strong binder
SSSGWTAGAAAYYVG	surface_glycoprotein_S1_254-260	11	HLA-DQA10401-DQB10328	0.567326	0.22	Strong binder
SSGWTAGAAAYYVGY	surface_glycoprotein_S1_254-260	12	HLA-DQA10402-DQB10308	0.088583	0.22	Strong binder
SSSGWTAGAAAYYVG	surface_glycoprotein_S1_254-260	11	HLA-DQA10402-DQB10328	0.567326	0.22	Strong binder
SSGWTAGAAAYYVGY	surface_glycoprotein_S1_254-260	12	HLA-DQA10404-DQB10308	0.088583	0.22	Strong binder
SSSGWTAGAAAYYVG	surface_glycoprotein_S1_254-260	11	HLA-DQA10404-DQB10328	0.567326	0.22	Strong binder
SSSGWTAGAAAYYVG	surface_glycoprotein_S1_254-260	11	HLA-DQA10601-DQB10312	0.37128	0.22	Strong binder
SSSGWTAGAAAYYVG	surface_glycoprotein_S1_254-260	11	HLA-DQA10602-DQB10312	0.37128	0.22	Strong binder
NSPRRARSVASQSII	surface_glycoprotein_S1-S2_682-689	8	HLA-DPA10103-DPB111401	0.717715	0.23	Strong binder
SPRRARSVASQSIIA	surface_glycoprotein_S1-S2_682-689	9	HLA-DPA10103-DPB113201	0.764584	0.23	Strong binder
SPRRARSVASQSIIA	surface_glycoprotein_S1-S2_682-689	9	HLA-DPA10103-DPB13501	0.764584	0.23	Strong binder
SPRRARSVASQSIIA	surface_glycoprotein_S1-S2_682-689	9	HLA-DPA10103-DPB17901	0.764584	0.23	Strong binder
NSPRRARSVASQSII	surface_glycoprotein_S1-S2_682-689	8	HLA-DPA10104-DPB111401	0.717715	0.23	Strong binder
SPRRARSVASQSIIA	surface_glycoprotein_S1-S2_682-689	9	HLA-DPA10104-DPB113201	0.764584	0.23	Strong binder
SPRRARSVASQSIIA	surface_glycoprotein_S1-S2_682-689	9	HLA-DPA10104-DPB13501	0.764584	0.23	Strong binder
SPRRARSVASQSIIA	surface_glycoprotein_S1-S2_682-689	9	HLA-DPA10104-DPB17901	0.764584	0.23	Strong binder
NSPRRARSVASQSII	surface_glycoprotein_S1-S2_682-689	8	HLA-DPA10105-DPB111401	0.717715	0.23	Strong binder
SPRRARSVASQSIIA	surface_glycoprotein_S1-S2_682-689	9	HLA-DPA10105-DPB113201	0.764584	0.23	Strong binder
SPRRARSVASQSIIA	surface_glycoprotein_S1-S2_682-689	9	HLA-DPA10105-DPB13501	0.764584	0.23	Strong binder
SPRRARSVASQSIIA	surface_glycoprotein_S1-S2_682-689	9	HLA-DPA10105-DPB17901	0.764584	0.23	Strong binder
NSPRRARSVASQSII	surface_glycoprotein_S1-S2_682-689	8	HLA-DPA10107-DPB111401	0.717715	0.23	Strong binder
SPRRARSVASQSIIA	surface_glycoprotein_S1-S2_682-689	9	HLA-DPA10107-DPB113201	0.764584	0.23	Strong binder
SPRRARSVASQSIIA	surface_glycoprotein_S1-S2_682-689	9	HLA-DPA10107-DPB13501	0.764584	0.23	Strong binder
SPRRARSVASQSIIA	surface_glycoprotein_S1-S2_682-689	9	HLA-DPA10107-DPB17901	0.764584	0.23	Strong binder
NSPRRARSVASQSII	surface_glycoprotein_S1-S2_682-689	8	HLA-DPA10108-DPB111401	0.717715	0.23	Strong binder
SPRRARSVASQSIIA	surface_glycoprotein_S1-S2_682-689	9	HLA-DPA10108-DPB113201	0.764584	0.23	Strong binder
SPRRARSVASQSIIA	surface_glycoprotein_S1-S2_682-689	9	HLA-DPA10108-DPB13501	0.764584	0.23	Strong binder
SPRRARSVASQSIIA	surface_glycoprotein_S1-S2_682-689	9	HLA-DPA10108-DPB17901	0.764584	0.23	Strong binder
NSPRRARSVASQSII	surface_glycoprotein_S1-S2_682-689	8	HLA-DPA10109-DPB111401	0.717715	0.23	Strong binder
SPRRARSVASQSIIA	surface_glycoprotein_S1-S2_682-689	9	HLA-DPA10109-DPB113201	0.764584	0.23	Strong binder
SPRRARSVASQSIIA	surface_glycoprotein_S1-S2_682-689	9	HLA-DPA10109-DPB13501	0.764584	0.23	Strong binder
SPRRARSVASQSIIA	surface_glycoprotein_S1-S2_682-689	9	HLA-DPA10109-DPB17901	0.764584	0.23	Strong binder
NSPRRARSVASQSII	surface_glycoprotein_S1-S2_682-689	8	HLA-DPA10110-DPB111401	0.717715	0.23	Strong binder
SPRRARSVASQSIIA	surface_glycoprotein_S1-S2_682-689	9	HLA-DPA10110-DPB113201	0.764584	0.23	Strong binder
SPRRARSVASQSIIA	surface_glycoprotein_S1-S2_682-689	9	HLA-DPA10110-DPB13501	0.764584	0.23	Strong binder
SPRRARSVASQSIIA	surface_glycoprotein_S1-S2_682-689	9	HLA-DPA10110-DPB17901	0.764584	0.23	Strong binder
NSPRRARSVASQSII	surface_glycoprotein_S1-S2_682-689	8	HLA-DPA10203-DPB111401	0.717715	0.23	Strong binder
SPRRARSVASQSIIA	surface_glycoprotein_S1-S2_682-689	9	HLA-DPA10203-DPB113201	0.764584	0.23	Strong binder
SPRRARSVASQSIIA	surface_glycoprotein_S1-S2_682-689	9	HLA-DPA10203-DPB13501	0.764584	0.23	Strong binder
SPRRARSVASQSIIA	surface_glycoprotein_S1-S2_682-689	9	HLA-DPA10203-DPB17901	0.764584	0.23	Strong binder
NSPRRARSVASQSII	surface_glycoprotein_S1-S2_682-689	8	HLA-DPA10301-DPB12901	0.368907	0.23	Strong binder
NSPRRARSVASQSII	surface_glycoprotein_S1-S2_682-689	8	HLA-DPA10301-DPB14401	0.368907	0.23	Strong binder
TNSPRRARSVASQSI	surface_glycoprotein_S1-S2_682-689	7	HLA-DPA10302-DPB113101	0.636057	0.23	Strong binder
TNSPRRARSVASQSI	surface_glycoprotein_S1-S2_682-689	7	HLA-DPA10302-DPB11701	0.636057	0.23	Strong binder
TNSPRRARSVASQSI	surface_glycoprotein_S1-S2_682-689	7	HLA-DPA10302-DPB19301	0.636057	0.23	Strong binder
NSPRRARSVASQSII	surface_glycoprotein_S1-S2_682-689	8	HLA-DPA10303-DPB12901	0.368907	0.23	Strong binder
NSPRRARSVASQSII	surface_glycoprotein_S1-S2_682-689	8	HLA-DPA10303-DPB14401	0.368907	0.23	Strong binder
TNSPRRARSVASQSI	surface_glycoprotein_S1-S2_682-689	7	HLA-DPA10401-DPB111401	0.678694	0.23	Strong binder
SPRRARSVASQSIIA	surface_glycoprotein_S1-S2_682-689	9	HLA-DPA10401-DPB111901	0.64421	0.23	Strong binder
SPRRARSVASQSIIA	surface_glycoprotein_S1-S2_682-689	9	HLA-DPA10401-DPB19801	0.749707	0.23	Strong binder
PANNAAIVLQLPQGT	N_protein_158-164	4	HLA-DQA10102-DQB10602	0.745262	0.23	Strong binder
PANNAAIVLQLPQGT	N_protein_158-164	4	HLA-DQA10102-DQB10616	0.745262	0.23	Strong binder
NPANNAAIVLQLPQG	N_protein_158-164	3	HLA-DQA10102-DQB10618	0.449354	0.23	Strong binder
PANNAAIVLQLPQGT	N_protein_158-164	4	HLA-DQA10102-DQB10619	0.745262	0.23	Strong binder
PANNAAIVLQLPQGT	N_protein_158-164	4	HLA-DQA10106-DQB10602	0.745262	0.23	Strong binder
PANNAAIVLQLPQGT	N_protein_158-164	4	HLA-DQA10106-DQB10616	0.745262	0.23	Strong binder
NPANNAAIVLQLPQG	N_protein_158-164	3	HLA-DQA10106-DQB10618	0.449354	0.23	Strong binder
PANNAAIVLQLPQGT	N_protein_158-164	4	HLA-DQA10106-DQB10619	0.745262	0.23	Strong binder
PANNAAIVLQLPQGT	N_protein_158-164	4	HLA-DQA10108-DQB10602	0.745262	0.23	Strong binder
PANNAAIVLQLPQGT	N_protein_158-164	4	HLA-DQA10108-DQB10616	0.745262	0.23	Strong binder
NPANNAAIVLQLPQG	N_protein_158-164	3	HLA-DQA10108-DQB10618	0.449354	0.23	Strong binder
PANNAAIVLQLPQGT	N_protein_158-164	4	HLA-DQA10108-DQB10619	0.745262	0.23	Strong binder
PANNAAIVLQLPQGT	N_protein_158-164	4	HLA-DQA10109-DQB10602	0.745262	0.23	Strong binder
PANNAAIVLQLPQGT	N_protein_158-164	4	HLA-DQA10109-DQB10616	0.745262	0.23	Strong binder
NPANNAAIVLQLPQG	N_protein_158-164	3	HLA-DQA10109-DQB10618	0.449354	0.23	Strong binder
PANNAAIVLQLPQGT	N_protein_158-164	4	HLA-DQA10109-DQB10619	0.745262	0.23	Strong binder
SSGWTAGAAAYYVGY	surface_glycoprotein_S1_254-260	12	HLA-DQA10201-DQB10312	0.45423	0.23	Strong binder
SSSGWTAGAAAYYVG	surface_glycoprotein_S1_254-260	11	HLA-DQA10401-DQB10301	0.544997	0.23	Strong binder
SSSGWTAGAAAYYVG	surface_glycoprotein_S1_254-260	11	HLA-DQA10401-DQB10309	0.544997	0.23	Strong binder
SSSGWTAGAAAYYVG	surface_glycoprotein_S1_254-260	11	HLA-DQA10401-DQB10310	0.544997	0.23	Strong binder
SSSGWTAGAAAYYVG	surface_glycoprotein_S1_254-260	11	HLA-DQA10401-DQB10316	0.544997	0.23	Strong binder
SSSGWTAGAAAYYVG	surface_glycoprotein_S1_254-260	11	HLA-DQA10401-DQB10319	0.544997	0.23	Strong binder
SSSGWTAGAAAYYVG	surface_glycoprotein_S1_254-260	11	HLA-DQA10401-DQB10321	0.544997	0.23	Strong binder
SSSGWTAGAAAYYVG	surface_glycoprotein_S1_254-260	11	HLA-DQA10401-DQB10322	0.544997	0.23	Strong binder
SSSGWTAGAAAYYVG	surface_glycoprotein_S1_254-260	11	HLA-DQA10401-DQB10324	0.544997	0.23	Strong binder
SSSGWTAGAAAYYVG	surface_glycoprotein_S1_254-260	11	HLA-DQA10401-DQB10327	0.544997	0.23	Strong binder
SSSGWTAGAAAYYVG	surface_glycoprotein_S1_254-260	11	HLA-DQA10401-DQB10329	0.544997	0.23	Strong binder
SSSGWTAGAAAYYVG	surface_glycoprotein_S1_254-260	11	HLA-DQA10401-DQB10335	0.544997	0.23	Strong binder
SSSGWTAGAAAYYVG	surface_glycoprotein_S1_254-260	11	HLA-DQA10401-DQB10336	0.544997	0.23	Strong binder
SSGWTAGAAAYYVGY	surface_glycoprotein_S1_254-260	12	HLA-DQA10401-DQB10615	0.288308	0.23	Strong binder
SSSGWTAGAAAYYVG	surface_glycoprotein_S1_254-260	11	HLA-DQA10401-DQB10618	0.221144	0.23	Strong binder
SSGWTAGAAAYYVGY	surface_glycoprotein_S1_254-260	12	HLA-DQA10401-DQB10629	0.126083	0.23	Strong binder
SSGWTAGAAAYYVGY	surface_glycoprotein_S1_254-260	12	HLA-DQA10401-DQB10637	0.271494	0.23	Strong binder
SSSGWTAGAAAYYVG	surface_glycoprotein_S1_254-260	11	HLA-DQA10402-DQB10301	0.544997	0.23	Strong binder
SSSGWTAGAAAYYVG	surface_glycoprotein_S1_254-260	11	HLA-DQA10402-DQB10309	0.544997	0.23	Strong binder
SSSGWTAGAAAYYVG	surface_glycoprotein_S1_254-260	11	HLA-DQA10402-DQB10310	0.544997	0.23	Strong binder
SSSGWTAGAAAYYVG	surface_glycoprotein_S1_254-260	11	HLA-DQA10402-DQB10316	0.544997	0.23	Strong binder
SSSGWTAGAAAYYVG	surface_glycoprotein_S1_254-260	11	HLA-DQA10402-DQB10319	0.544997	0.23	Strong binder
SSSGWTAGAAAYYVG	surface_glycoprotein_S1_254-260	11	HLA-DQA10402-DQB10321	0.544997	0.23	Strong binder
SSSGWTAGAAAYYVG	surface_glycoprotein_S1_254-260	11	HLA-DQA10402-DQB10322	0.544997	0.23	Strong binder
SSSGWTAGAAAYYVG	surface_glycoprotein_S1_254-260	11	HLA-DQA10402-DQB10324	0.544997	0.23	Strong binder
SSSGWTAGAAAYYVG	surface_glycoprotein_S1_254-260	11	HLA-DQA10402-DQB10327	0.544997	0.23	Strong binder
SSSGWTAGAAAYYVG	surface_glycoprotein_S1_254-260	11	HLA-DQA10402-DQB10329	0.544997	0.23	Strong binder
SSSGWTAGAAAYYVG	surface_glycoprotein_S1_254-260	11	HLA-DQA10402-DQB10335	0.544997	0.23	Strong binder
SSSGWTAGAAAYYVG	surface_glycoprotein_S1_254-260	11	HLA-DQA10402-DQB10336	0.544997	0.23	Strong binder
SSGWTAGAAAYYVGY	surface_glycoprotein_S1_254-260	12	HLA-DQA10402-DQB10615	0.288308	0.23	Strong binder
SSSGWTAGAAAYYVG	surface_glycoprotein_S1_254-260	11	HLA-DQA10402-DQB10618	0.221144	0.23	Strong binder
SSGWTAGAAAYYVGY	surface_glycoprotein_S1_254-260	12	HLA-DQA10402-DQB10629	0.126083	0.23	Strong binder
SSGWTAGAAAYYVGY	surface_glycoprotein_S1_254-260	12	HLA-DQA10402-DQB10637	0.271494	0.23	Strong binder
SSSGWTAGAAAYYVG	surface_glycoprotein_S1_254-260	11	HLA-DQA10404-DQB10301	0.544997	0.23	Strong binder
SSSGWTAGAAAYYVG	surface_glycoprotein_S1_254-260	11	HLA-DQA10404-DQB10309	0.544997	0.23	Strong binder
SSSGWTAGAAAYYVG	surface_glycoprotein_S1_254-260	11	HLA-DQA10404-DQB10310	0.544997	0.23	Strong binder
SSSGWTAGAAAYYVG	surface_glycoprotein_S1_254-260	11	HLA-DQA10404-DQB10316	0.544997	0.23	Strong binder
SSSGWTAGAAAYYVG	surface_glycoprotein_S1_254-260	11	HLA-DQA10404-DQB10319	0.544997	0.23	Strong binder
SSSGWTAGAAAYYVG	surface_glycoprotein_S1_254-260	11	HLA-DQA10404-DQB10321	0.544997	0.23	Strong binder
SSSGWTAGAAAYYVG	surface_glycoprotein_S1_254-260	11	HLA-DQA10404-DQB10322	0.544997	0.23	Strong binder
SSSGWTAGAAAYYVG	surface_glycoprotein_S1_254-260	11	HLA-DQA10404-DQB10324	0.544997	0.23	Strong binder
SSSGWTAGAAAYYVG	surface_glycoprotein_S1_254-260	11	HLA-DQA10404-DQB10327	0.544997	0.23	Strong binder
SSSGWTAGAAAYYVG	surface_glycoprotein_S1_254-260	11	HLA-DQA10404-DQB10329	0.544997	0.23	Strong binder
SSSGWTAGAAAYYVG	surface_glycoprotein_S1_254-260	11	HLA-DQA10404-DQB10335	0.544997	0.23	Strong binder
SSSGWTAGAAAYYVG	surface_glycoprotein_S1_254-260	11	HLA-DQA10404-DQB10336	0.544997	0.23	Strong binder
SSGWTAGAAAYYVGY	surface_glycoprotein_S1_254-260	12	HLA-DQA10404-DQB10615	0.288308	0.23	Strong binder
SSSGWTAGAAAYYVG	surface_glycoprotein_S1_254-260	11	HLA-DQA10404-DQB10618	0.221144	0.23	Strong binder
SSGWTAGAAAYYVGY	surface_glycoprotein_S1_254-260	12	HLA-DQA10404-DQB10629	0.126083	0.23	Strong binder
SSGWTAGAAAYYVGY	surface_glycoprotein_S1_254-260	12	HLA-DQA10404-DQB10637	0.271494	0.23	Strong binder
SSSGWTAGAAAYYVG	surface_glycoprotein_S1_254-260	11	HLA-DQA10501-DQB10301	0.787883	0.23	Strong binder
SSGWTAGAAAYYVGY	surface_glycoprotein_S1_254-260	12	HLA-DQA10501-DQB10308	0.117562	0.23	Strong binder
SSSGWTAGAAAYYVG	surface_glycoprotein_S1_254-260	11	HLA-DQA10501-DQB10309	0.787883	0.23	Strong binder
SSSGWTAGAAAYYVG	surface_glycoprotein_S1_254-260	11	HLA-DQA10501-DQB10310	0.787883	0.23	Strong binder
SSSGWTAGAAAYYVG	surface_glycoprotein_S1_254-260	11	HLA-DQA10501-DQB10316	0.787883	0.23	Strong binder
SSSGWTAGAAAYYVG	surface_glycoprotein_S1_254-260	11	HLA-DQA10501-DQB10319	0.787883	0.23	Strong binder
SSSGWTAGAAAYYVG	surface_glycoprotein_S1_254-260	11	HLA-DQA10501-DQB10321	0.787883	0.23	Strong binder
SSSGWTAGAAAYYVG	surface_glycoprotein_S1_254-260	11	HLA-DQA10501-DQB10322	0.787883	0.23	Strong binder
SSSGWTAGAAAYYVG	surface_glycoprotein_S1_254-260	11	HLA-DQA10501-DQB10324	0.787883	0.23	Strong binder
SSSGWTAGAAAYYVG	surface_glycoprotein_S1_254-260	11	HLA-DQA10501-DQB10327	0.787883	0.23	Strong binder
SSSGWTAGAAAYYVG	surface_glycoprotein_S1_254-260	11	HLA-DQA10501-DQB10328	0.803837	0.23	Strong binder
SSSGWTAGAAAYYVG	surface_glycoprotein_S1_254-260	11	HLA-DQA10501-DQB10329	0.787883	0.23	Strong binder
SSGWTAGAAAYYVGY	surface_glycoprotein_S1_254-260	12	HLA-DQA10501-DQB10330	0.290992	0.23	Strong binder
SSSGWTAGAAAYYVG	surface_glycoprotein_S1_254-260	11	HLA-DQA10501-DQB10335	0.787883	0.23	Strong binder
SSSGWTAGAAAYYVG	surface_glycoprotein_S1_254-260	11	HLA-DQA10501-DQB10336	0.787883	0.23	Strong binder
SSSGWTAGAAAYYVG	surface_glycoprotein_S1_254-260	11	HLA-DQA10501-DQB10622	0.201635	0.23	Strong binder
SSSGWTAGAAAYYVG	surface_glycoprotein_S1_254-260	11	HLA-DQA10503-DQB10301	0.787883	0.23	Strong binder
SSGWTAGAAAYYVGY	surface_glycoprotein_S1_254-260	12	HLA-DQA10503-DQB10308	0.117562	0.23	Strong binder
SSSGWTAGAAAYYVG	surface_glycoprotein_S1_254-260	11	HLA-DQA10503-DQB10309	0.787883	0.23	Strong binder
SSSGWTAGAAAYYVG	surface_glycoprotein_S1_254-260	11	HLA-DQA10503-DQB10310	0.787883	0.23	Strong binder
SSSGWTAGAAAYYVG	surface_glycoprotein_S1_254-260	11	HLA-DQA10503-DQB10316	0.787883	0.23	Strong binder
SSSGWTAGAAAYYVG	surface_glycoprotein_S1_254-260	11	HLA-DQA10503-DQB10319	0.787883	0.23	Strong binder
SSSGWTAGAAAYYVG	surface_glycoprotein_S1_254-260	11	HLA-DQA10503-DQB10321	0.787883	0.23	Strong binder
SSSGWTAGAAAYYVG	surface_glycoprotein_S1_254-260	11	HLA-DQA10503-DQB10322	0.787883	0.23	Strong binder
SSSGWTAGAAAYYVG	surface_glycoprotein_S1_254-260	11	HLA-DQA10503-DQB10324	0.787883	0.23	Strong binder
SSSGWTAGAAAYYVG	surface_glycoprotein_S1_254-260	11	HLA-DQA10503-DQB10327	0.787883	0.23	Strong binder
SSSGWTAGAAAYYVG	surface_glycoprotein_S1_254-260	11	HLA-DQA10503-DQB10328	0.803837	0.23	Strong binder
SSSGWTAGAAAYYVG	surface_glycoprotein_S1_254-260	11	HLA-DQA10503-DQB10329	0.787883	0.23	Strong binder
SSGWTAGAAAYYVGY	surface_glycoprotein_S1_254-260	12	HLA-DQA10503-DQB10330	0.290992	0.23	Strong binder
SSSGWTAGAAAYYVG	surface_glycoprotein_S1_254-260	11	HLA-DQA10503-DQB10335	0.787883	0.23	Strong binder
SSSGWTAGAAAYYVG	surface_glycoprotein_S1_254-260	11	HLA-DQA10503-DQB10336	0.787883	0.23	Strong binder
SSSGWTAGAAAYYVG	surface_glycoprotein_S1_254-260	11	HLA-DQA10503-DQB10622	0.201635	0.23	Strong binder
SSSGWTAGAAAYYVG	surface_glycoprotein_S1_254-260	11	HLA-DQA10504-DQB10301	0.787883	0.23	Strong binder
SSGWTAGAAAYYVGY	surface_glycoprotein_S1_254-260	12	HLA-DQA10504-DQB10308	0.117562	0.23	Strong binder
SSSGWTAGAAAYYVG	surface_glycoprotein_S1_254-260	11	HLA-DQA10504-DQB10309	0.787883	0.23	Strong binder
SSSGWTAGAAAYYVG	surface_glycoprotein_S1_254-260	11	HLA-DQA10504-DQB10310	0.787883	0.23	Strong binder
SSSGWTAGAAAYYVG	surface_glycoprotein_S1_254-260	11	HLA-DQA10504-DQB10316	0.787883	0.23	Strong binder
SSSGWTAGAAAYYVG	surface_glycoprotein_S1_254-260	11	HLA-DQA10504-DQB10319	0.787883	0.23	Strong binder
SSSGWTAGAAAYYVG	surface_glycoprotein_S1_254-260	11	HLA-DQA10504-DQB10321	0.787883	0.23	Strong binder
SSSGWTAGAAAYYVG	surface_glycoprotein_S1_254-260	11	HLA-DQA10504-DQB10322	0.787883	0.23	Strong binder
SSSGWTAGAAAYYVG	surface_glycoprotein_S1_254-260	11	HLA-DQA10504-DQB10324	0.787883	0.23	Strong binder
SSSGWTAGAAAYYVG	surface_glycoprotein_S1_254-260	11	HLA-DQA10504-DQB10327	0.787883	0.23	Strong binder
SSSGWTAGAAAYYVG	surface_glycoprotein_S1_254-260	11	HLA-DQA10504-DQB10328	0.803837	0.23	Strong binder
SSSGWTAGAAAYYVG	surface_glycoprotein_S1_254-260	11	HLA-DQA10504-DQB10329	0.787883	0.23	Strong binder
SSGWTAGAAAYYVGY	surface_glycoprotein_S1_254-260	12	HLA-DQA10504-DQB10330	0.290992	0.23	Strong binder
SSSGWTAGAAAYYVG	surface_glycoprotein_S1_254-260	11	HLA-DQA10504-DQB10335	0.787883	0.23	Strong binder
SSSGWTAGAAAYYVG	surface_glycoprotein_S1_254-260	11	HLA-DQA10504-DQB10336	0.787883	0.23	Strong binder
SSSGWTAGAAAYYVG	surface_glycoprotein_S1_254-260	11	HLA-DQA10504-DQB10622	0.201635	0.23	Strong binder
SSSGWTAGAAAYYVG	surface_glycoprotein_S1_254-260	11	HLA-DQA10505-DQB10301	0.787883	0.23	Strong binder
SSGWTAGAAAYYVGY	surface_glycoprotein_S1_254-260	12	HLA-DQA10505-DQB10308	0.117562	0.23	Strong binder
SSSGWTAGAAAYYVG	surface_glycoprotein_S1_254-260	11	HLA-DQA10505-DQB10309	0.787883	0.23	Strong binder
SSSGWTAGAAAYYVG	surface_glycoprotein_S1_254-260	11	HLA-DQA10505-DQB10310	0.787883	0.23	Strong binder
SSSGWTAGAAAYYVG	surface_glycoprotein_S1_254-260	11	HLA-DQA10505-DQB10316	0.787883	0.23	Strong binder
SSSGWTAGAAAYYVG	surface_glycoprotein_S1_254-260	11	HLA-DQA10505-DQB10319	0.787883	0.23	Strong binder
SSSGWTAGAAAYYVG	surface_glycoprotein_S1_254-260	11	HLA-DQA10505-DQB10321	0.787883	0.23	Strong binder
SSSGWTAGAAAYYVG	surface_glycoprotein_S1_254-260	11	HLA-DQA10505-DQB10322	0.787883	0.23	Strong binder
SSSGWTAGAAAYYVG	surface_glycoprotein_S1_254-260	11	HLA-DQA10505-DQB10324	0.787883	0.23	Strong binder
SSSGWTAGAAAYYVG	surface_glycoprotein_S1_254-260	11	HLA-DQA10505-DQB10327	0.787883	0.23	Strong binder
SSSGWTAGAAAYYVG	surface_glycoprotein_S1_254-260	11	HLA-DQA10505-DQB10328	0.803837	0.23	Strong binder
SSSGWTAGAAAYYVG	surface_glycoprotein_S1_254-260	11	HLA-DQA10505-DQB10329	0.787883	0.23	Strong binder
SSGWTAGAAAYYVGY	surface_glycoprotein_S1_254-260	12	HLA-DQA10505-DQB10330	0.290992	0.23	Strong binder
SSSGWTAGAAAYYVG	surface_glycoprotein_S1_254-260	11	HLA-DQA10505-DQB10335	0.787883	0.23	Strong binder
SSSGWTAGAAAYYVG	surface_glycoprotein_S1_254-260	11	HLA-DQA10505-DQB10336	0.787883	0.23	Strong binder
SSSGWTAGAAAYYVG	surface_glycoprotein_S1_254-260	11	HLA-DQA10505-DQB10622	0.201635	0.23	Strong binder
SSSGWTAGAAAYYVG	surface_glycoprotein_S1_254-260	11	HLA-DQA10506-DQB10301	0.787883	0.23	Strong binder
SSGWTAGAAAYYVGY	surface_glycoprotein_S1_254-260	12	HLA-DQA10506-DQB10308	0.117562	0.23	Strong binder
SSSGWTAGAAAYYVG	surface_glycoprotein_S1_254-260	11	HLA-DQA10506-DQB10309	0.787883	0.23	Strong binder
SSSGWTAGAAAYYVG	surface_glycoprotein_S1_254-260	11	HLA-DQA10506-DQB10310	0.787883	0.23	Strong binder
SSSGWTAGAAAYYVG	surface_glycoprotein_S1_254-260	11	HLA-DQA10506-DQB10316	0.787883	0.23	Strong binder
SSSGWTAGAAAYYVG	surface_glycoprotein_S1_254-260	11	HLA-DQA10506-DQB10319	0.787883	0.23	Strong binder
SSSGWTAGAAAYYVG	surface_glycoprotein_S1_254-260	11	HLA-DQA10506-DQB10321	0.787883	0.23	Strong binder
SSSGWTAGAAAYYVG	surface_glycoprotein_S1_254-260	11	HLA-DQA10506-DQB10322	0.787883	0.23	Strong binder
SSSGWTAGAAAYYVG	surface_glycoprotein_S1_254-260	11	HLA-DQA10506-DQB10324	0.787883	0.23	Strong binder
SSSGWTAGAAAYYVG	surface_glycoprotein_S1_254-260	11	HLA-DQA10506-DQB10327	0.787883	0.23	Strong binder
SSSGWTAGAAAYYVG	surface_glycoprotein_S1_254-260	11	HLA-DQA10506-DQB10328	0.803837	0.23	Strong binder
SSSGWTAGAAAYYVG	surface_glycoprotein_S1_254-260	11	HLA-DQA10506-DQB10329	0.787883	0.23	Strong binder
SSGWTAGAAAYYVGY	surface_glycoprotein_S1_254-260	12	HLA-DQA10506-DQB10330	0.290992	0.23	Strong binder
SSSGWTAGAAAYYVG	surface_glycoprotein_S1_254-260	11	HLA-DQA10506-DQB10335	0.787883	0.23	Strong binder
SSSGWTAGAAAYYVG	surface_glycoprotein_S1_254-260	11	HLA-DQA10506-DQB10336	0.787883	0.23	Strong binder
SSSGWTAGAAAYYVG	surface_glycoprotein_S1_254-260	11	HLA-DQA10506-DQB10622	0.201635	0.23	Strong binder
SSSGWTAGAAAYYVG	surface_glycoprotein_S1_254-260	11	HLA-DQA10507-DQB10301	0.787883	0.23	Strong binder
SSGWTAGAAAYYVGY	surface_glycoprotein_S1_254-260	12	HLA-DQA10507-DQB10308	0.117562	0.23	Strong binder
SSSGWTAGAAAYYVG	surface_glycoprotein_S1_254-260	11	HLA-DQA10507-DQB10309	0.787883	0.23	Strong binder
SSSGWTAGAAAYYVG	surface_glycoprotein_S1_254-260	11	HLA-DQA10507-DQB10310	0.787883	0.23	Strong binder
SSSGWTAGAAAYYVG	surface_glycoprotein_S1_254-260	11	HLA-DQA10507-DQB10316	0.787883	0.23	Strong binder
SSSGWTAGAAAYYVG	surface_glycoprotein_S1_254-260	11	HLA-DQA10507-DQB10319	0.787883	0.23	Strong binder
SSSGWTAGAAAYYVG	surface_glycoprotein_S1_254-260	11	HLA-DQA10507-DQB10321	0.787883	0.23	Strong binder
SSSGWTAGAAAYYVG	surface_glycoprotein_S1_254-260	11	HLA-DQA10507-DQB10322	0.787883	0.23	Strong binder
SSSGWTAGAAAYYVG	surface_glycoprotein_S1_254-260	11	HLA-DQA10507-DQB10324	0.787883	0.23	Strong binder
SSSGWTAGAAAYYVG	surface_glycoprotein_S1_254-260	11	HLA-DQA10507-DQB10327	0.787883	0.23	Strong binder
SSSGWTAGAAAYYVG	surface_glycoprotein_S1_254-260	11	HLA-DQA10507-DQB10328	0.803837	0.23	Strong binder
SSSGWTAGAAAYYVG	surface_glycoprotein_S1_254-260	11	HLA-DQA10507-DQB10329	0.787883	0.23	Strong binder
SSGWTAGAAAYYVGY	surface_glycoprotein_S1_254-260	12	HLA-DQA10507-DQB10330	0.290992	0.23	Strong binder
SSSGWTAGAAAYYVG	surface_glycoprotein_S1_254-260	11	HLA-DQA10507-DQB10335	0.787883	0.23	Strong binder
SSSGWTAGAAAYYVG	surface_glycoprotein_S1_254-260	11	HLA-DQA10507-DQB10336	0.787883	0.23	Strong binder
SSSGWTAGAAAYYVG	surface_glycoprotein_S1_254-260	11	HLA-DQA10507-DQB10622	0.201635	0.23	Strong binder
SSSGWTAGAAAYYVG	surface_glycoprotein_S1_254-260	11	HLA-DQA10508-DQB10301	0.787883	0.23	Strong binder
SSGWTAGAAAYYVGY	surface_glycoprotein_S1_254-260	12	HLA-DQA10508-DQB10308	0.117562	0.23	Strong binder
SSSGWTAGAAAYYVG	surface_glycoprotein_S1_254-260	11	HLA-DQA10508-DQB10309	0.787883	0.23	Strong binder
SSSGWTAGAAAYYVG	surface_glycoprotein_S1_254-260	11	HLA-DQA10508-DQB10310	0.787883	0.23	Strong binder
SSSGWTAGAAAYYVG	surface_glycoprotein_S1_254-260	11	HLA-DQA10508-DQB10316	0.787883	0.23	Strong binder
SSSGWTAGAAAYYVG	surface_glycoprotein_S1_254-260	11	HLA-DQA10508-DQB10319	0.787883	0.23	Strong binder
SSSGWTAGAAAYYVG	surface_glycoprotein_S1_254-260	11	HLA-DQA10508-DQB10321	0.787883	0.23	Strong binder
SSSGWTAGAAAYYVG	surface_glycoprotein_S1_254-260	11	HLA-DQA10508-DQB10322	0.787883	0.23	Strong binder
SSSGWTAGAAAYYVG	surface_glycoprotein_S1_254-260	11	HLA-DQA10508-DQB10324	0.787883	0.23	Strong binder
SSSGWTAGAAAYYVG	surface_glycoprotein_S1_254-260	11	HLA-DQA10508-DQB10327	0.787883	0.23	Strong binder
SSSGWTAGAAAYYVG	surface_glycoprotein_S1_254-260	11	HLA-DQA10508-DQB10328	0.803837	0.23	Strong binder
SSSGWTAGAAAYYVG	surface_glycoprotein_S1_254-260	11	HLA-DQA10508-DQB10329	0.787883	0.23	Strong binder
SSGWTAGAAAYYVGY	surface_glycoprotein_S1_254-260	12	HLA-DQA10508-DQB10330	0.290992	0.23	Strong binder
SSSGWTAGAAAYYVG	surface_glycoprotein_S1_254-260	11	HLA-DQA10508-DQB10335	0.787883	0.23	Strong binder
SSSGWTAGAAAYYVG	surface_glycoprotein_S1_254-260	11	HLA-DQA10508-DQB10336	0.787883	0.23	Strong binder
SSSGWTAGAAAYYVG	surface_glycoprotein_S1_254-260	11	HLA-DQA10508-DQB10622	0.201635	0.23	Strong binder
SSSGWTAGAAAYYVG	surface_glycoprotein_S1_254-260	11	HLA-DQA10509-DQB10301	0.787883	0.23	Strong binder
SSGWTAGAAAYYVGY	surface_glycoprotein_S1_254-260	12	HLA-DQA10509-DQB10308	0.117562	0.23	Strong binder
SSSGWTAGAAAYYVG	surface_glycoprotein_S1_254-260	11	HLA-DQA10509-DQB10309	0.787883	0.23	Strong binder
SSSGWTAGAAAYYVG	surface_glycoprotein_S1_254-260	11	HLA-DQA10509-DQB10310	0.787883	0.23	Strong binder
SSSGWTAGAAAYYVG	surface_glycoprotein_S1_254-260	11	HLA-DQA10509-DQB10316	0.787883	0.23	Strong binder
SSSGWTAGAAAYYVG	surface_glycoprotein_S1_254-260	11	HLA-DQA10509-DQB10319	0.787883	0.23	Strong binder
SSSGWTAGAAAYYVG	surface_glycoprotein_S1_254-260	11	HLA-DQA10509-DQB10321	0.787883	0.23	Strong binder
SSSGWTAGAAAYYVG	surface_glycoprotein_S1_254-260	11	HLA-DQA10509-DQB10322	0.787883	0.23	Strong binder
SSSGWTAGAAAYYVG	surface_glycoprotein_S1_254-260	11	HLA-DQA10509-DQB10324	0.787883	0.23	Strong binder
SSSGWTAGAAAYYVG	surface_glycoprotein_S1_254-260	11	HLA-DQA10509-DQB10327	0.787883	0.23	Strong binder
SSSGWTAGAAAYYVG	surface_glycoprotein_S1_254-260	11	HLA-DQA10509-DQB10328	0.803837	0.23	Strong binder
SSSGWTAGAAAYYVG	surface_glycoprotein_S1_254-260	11	HLA-DQA10509-DQB10329	0.787883	0.23	Strong binder
SSGWTAGAAAYYVGY	surface_glycoprotein_S1_254-260	12	HLA-DQA10509-DQB10330	0.290992	0.23	Strong binder
SSSGWTAGAAAYYVG	surface_glycoprotein_S1_254-260	11	HLA-DQA10509-DQB10335	0.787883	0.23	Strong binder
SSSGWTAGAAAYYVG	surface_glycoprotein_S1_254-260	11	HLA-DQA10509-DQB10336	0.787883	0.23	Strong binder
SSSGWTAGAAAYYVG	surface_glycoprotein_S1_254-260	11	HLA-DQA10509-DQB10622	0.201635	0.23	Strong binder
SSSGWTAGAAAYYVG	surface_glycoprotein_S1_254-260	11	HLA-DQA10510-DQB10301	0.787883	0.23	Strong binder
SSGWTAGAAAYYVGY	surface_glycoprotein_S1_254-260	12	HLA-DQA10510-DQB10308	0.117562	0.23	Strong binder
SSSGWTAGAAAYYVG	surface_glycoprotein_S1_254-260	11	HLA-DQA10510-DQB10309	0.787883	0.23	Strong binder
SSSGWTAGAAAYYVG	surface_glycoprotein_S1_254-260	11	HLA-DQA10510-DQB10310	0.787883	0.23	Strong binder
SSSGWTAGAAAYYVG	surface_glycoprotein_S1_254-260	11	HLA-DQA10510-DQB10316	0.787883	0.23	Strong binder
SSSGWTAGAAAYYVG	surface_glycoprotein_S1_254-260	11	HLA-DQA10510-DQB10319	0.787883	0.23	Strong binder
SSSGWTAGAAAYYVG	surface_glycoprotein_S1_254-260	11	HLA-DQA10510-DQB10321	0.787883	0.23	Strong binder
SSSGWTAGAAAYYVG	surface_glycoprotein_S1_254-260	11	HLA-DQA10510-DQB10322	0.787883	0.23	Strong binder
SSSGWTAGAAAYYVG	surface_glycoprotein_S1_254-260	11	HLA-DQA10510-DQB10324	0.787883	0.23	Strong binder
SSSGWTAGAAAYYVG	surface_glycoprotein_S1_254-260	11	HLA-DQA10510-DQB10327	0.787883	0.23	Strong binder
SSSGWTAGAAAYYVG	surface_glycoprotein_S1_254-260	11	HLA-DQA10510-DQB10328	0.803837	0.23	Strong binder
SSSGWTAGAAAYYVG	surface_glycoprotein_S1_254-260	11	HLA-DQA10510-DQB10329	0.787883	0.23	Strong binder
SSGWTAGAAAYYVGY	surface_glycoprotein_S1_254-260	12	HLA-DQA10510-DQB10330	0.290992	0.23	Strong binder
SSSGWTAGAAAYYVG	surface_glycoprotein_S1_254-260	11	HLA-DQA10510-DQB10335	0.787883	0.23	Strong binder
SSSGWTAGAAAYYVG	surface_glycoprotein_S1_254-260	11	HLA-DQA10510-DQB10336	0.787883	0.23	Strong binder
SSSGWTAGAAAYYVG	surface_glycoprotein_S1_254-260	11	HLA-DQA10510-DQB10622	0.201635	0.23	Strong binder
SSSGWTAGAAAYYVG	surface_glycoprotein_S1_254-260	11	HLA-DQA10511-DQB10301	0.787883	0.23	Strong binder
SSGWTAGAAAYYVGY	surface_glycoprotein_S1_254-260	12	HLA-DQA10511-DQB10308	0.117562	0.23	Strong binder
SSSGWTAGAAAYYVG	surface_glycoprotein_S1_254-260	11	HLA-DQA10511-DQB10309	0.787883	0.23	Strong binder
SSSGWTAGAAAYYVG	surface_glycoprotein_S1_254-260	11	HLA-DQA10511-DQB10310	0.787883	0.23	Strong binder
SSSGWTAGAAAYYVG	surface_glycoprotein_S1_254-260	11	HLA-DQA10511-DQB10316	0.787883	0.23	Strong binder
SSSGWTAGAAAYYVG	surface_glycoprotein_S1_254-260	11	HLA-DQA10511-DQB10319	0.787883	0.23	Strong binder
SSSGWTAGAAAYYVG	surface_glycoprotein_S1_254-260	11	HLA-DQA10511-DQB10321	0.787883	0.23	Strong binder
SSSGWTAGAAAYYVG	surface_glycoprotein_S1_254-260	11	HLA-DQA10511-DQB10322	0.787883	0.23	Strong binder
SSSGWTAGAAAYYVG	surface_glycoprotein_S1_254-260	11	HLA-DQA10511-DQB10324	0.787883	0.23	Strong binder
SSSGWTAGAAAYYVG	surface_glycoprotein_S1_254-260	11	HLA-DQA10511-DQB10327	0.787883	0.23	Strong binder
SSSGWTAGAAAYYVG	surface_glycoprotein_S1_254-260	11	HLA-DQA10511-DQB10328	0.803837	0.23	Strong binder
SSSGWTAGAAAYYVG	surface_glycoprotein_S1_254-260	11	HLA-DQA10511-DQB10329	0.787883	0.23	Strong binder
SSGWTAGAAAYYVGY	surface_glycoprotein_S1_254-260	12	HLA-DQA10511-DQB10330	0.290992	0.23	Strong binder
SSSGWTAGAAAYYVG	surface_glycoprotein_S1_254-260	11	HLA-DQA10511-DQB10335	0.787883	0.23	Strong binder
SSSGWTAGAAAYYVG	surface_glycoprotein_S1_254-260	11	HLA-DQA10511-DQB10336	0.787883	0.23	Strong binder
SSSGWTAGAAAYYVG	surface_glycoprotein_S1_254-260	11	HLA-DQA10511-DQB10622	0.201635	0.23	Strong binder
SSGWTAGAAAYYVGY	surface_glycoprotein_S1_254-260	12	HLA-DQA10601-DQB10609	0.266599	0.23	Strong binder
SSGWTAGAAAYYVGY	surface_glycoprotein_S1_254-260	12	HLA-DQA10602-DQB10609	0.266599	0.23	Strong binder
NSPRRARSVASQSII	surface_glycoprotein_S1-S2_682-689	8	HLA-DPA10103-DPB19801	0.808808	0.24	Strong binder
NSPRRARSVASQSII	surface_glycoprotein_S1-S2_682-689	8	HLA-DPA10104-DPB19801	0.808808	0.24	Strong binder
NSPRRARSVASQSII	surface_glycoprotein_S1-S2_682-689	8	HLA-DPA10105-DPB19801	0.808808	0.24	Strong binder
NSPRRARSVASQSII	surface_glycoprotein_S1-S2_682-689	8	HLA-DPA10107-DPB19801	0.808808	0.24	Strong binder
NSPRRARSVASQSII	surface_glycoprotein_S1-S2_682-689	8	HLA-DPA10108-DPB19801	0.808808	0.24	Strong binder
NSPRRARSVASQSII	surface_glycoprotein_S1-S2_682-689	8	HLA-DPA10109-DPB19801	0.808808	0.24	Strong binder
NSPRRARSVASQSII	surface_glycoprotein_S1-S2_682-689	8	HLA-DPA10110-DPB19801	0.808808	0.24	Strong binder
NSPRRARSVASQSII	surface_glycoprotein_S1-S2_682-689	8	HLA-DPA10203-DPB19801	0.808808	0.24	Strong binder
NSPRRARSVASQSII	surface_glycoprotein_S1-S2_682-689	8	HLA-DPA10302-DPB113001	0.713219	0.24	Strong binder
SPRRARSVASQSIIA	surface_glycoprotein_S1-S2_682-689	9	HLA-DPA10302-DPB113101	0.631832	0.24	Strong binder
SPRRARSVASQSIIA	surface_glycoprotein_S1-S2_682-689	9	HLA-DPA10302-DPB11701	0.631832	0.24	Strong binder
NSPRRARSVASQSII	surface_glycoprotein_S1-S2_682-689	8	HLA-DPA10302-DPB12001	0.713219	0.24	Strong binder
NSPRRARSVASQSII	surface_glycoprotein_S1-S2_682-689	8	HLA-DPA10302-DPB19101	0.713219	0.24	Strong binder
SPRRARSVASQSIIA	surface_glycoprotein_S1-S2_682-689	9	HLA-DPA10302-DPB19301	0.631832	0.24	Strong binder
TNSPRRARSVASQSI	surface_glycoprotein_S1-S2_682-689	7	HLA-DPA10401-DPB111901	0.643737	0.24	Strong binder
SPRRARSVASQSIIA	surface_glycoprotein_S1-S2_682-689	9	HLA-DPA10401-DPB12101	0.632502	0.24	Strong binder
SPRRARSVASQSIIA	surface_glycoprotein_S1-S2_682-689	9	HLA-DPA10401-DPB13001	0.632502	0.24	Strong binder
NPANNAAIVLQLPQG	N_protein_158-164	3	HLA-DQA10101-DQB10642	0.152865	0.24	Strong binder
PANNAAIVLQLPQGT	N_protein_158-164	4	HLA-DQA10102-DQB10624	0.704988	0.24	Strong binder
NPANNAAIVLQLPQG	N_protein_158-164	3	HLA-DQA10104-DQB10642	0.152865	0.24	Strong binder
NPANNAAIVLQLPQG	N_protein_158-164	3	HLA-DQA10105-DQB10642	0.152865	0.24	Strong binder
PANNAAIVLQLPQGT	N_protein_158-164	4	HLA-DQA10106-DQB10624	0.704988	0.24	Strong binder
NPANNAAIVLQLPQG	N_protein_158-164	3	HLA-DQA10107-DQB10642	0.152865	0.24	Strong binder
PANNAAIVLQLPQGT	N_protein_158-164	4	HLA-DQA10108-DQB10624	0.704988	0.24	Strong binder
PANNAAIVLQLPQGT	N_protein_158-164	4	HLA-DQA10109-DQB10624	0.704988	0.24	Strong binder
SSSGWTAGAAAYYVG	surface_glycoprotein_S1_254-260	11	HLA-DQA10201-DQB10313	0.820082	0.24	Strong binder
DSSSGWTAGAAAYYV	surface_glycoprotein_S1_254-260	10	HLA-DQA10401-DQB10304	0.325295	0.24	Strong binder
SGWTAGAAAYYVGYL	surface_glycoprotein_S1_254-260	13	HLA-DQA10401-DQB10304	0.325327	0.24	Strong binder
DSSSGWTAGAAAYYV	surface_glycoprotein_S1_254-260	10	HLA-DQA10401-DQB10314	0.325295	0.24	Strong binder
SGWTAGAAAYYVGYL	surface_glycoprotein_S1_254-260	13	HLA-DQA10401-DQB10314	0.325327	0.24	Strong binder
DSSSGWTAGAAAYYV	surface_glycoprotein_S1_254-260	10	HLA-DQA10402-DQB10304	0.325295	0.24	Strong binder
SGWTAGAAAYYVGYL	surface_glycoprotein_S1_254-260	13	HLA-DQA10402-DQB10304	0.325327	0.24	Strong binder
DSSSGWTAGAAAYYV	surface_glycoprotein_S1_254-260	10	HLA-DQA10402-DQB10314	0.325295	0.24	Strong binder
SGWTAGAAAYYVGYL	surface_glycoprotein_S1_254-260	13	HLA-DQA10402-DQB10314	0.325327	0.24	Strong binder
DSSSGWTAGAAAYYV	surface_glycoprotein_S1_254-260	10	HLA-DQA10404-DQB10304	0.325295	0.24	Strong binder
SGWTAGAAAYYVGYL	surface_glycoprotein_S1_254-260	13	HLA-DQA10404-DQB10304	0.325327	0.24	Strong binder
DSSSGWTAGAAAYYV	surface_glycoprotein_S1_254-260	10	HLA-DQA10404-DQB10314	0.325295	0.24	Strong binder
SGWTAGAAAYYVGYL	surface_glycoprotein_S1_254-260	13	HLA-DQA10404-DQB10314	0.325327	0.24	Strong binder
SGWTAGAAAYYVGYL	surface_glycoprotein_S1_254-260	13	HLA-DQA10601-DQB10601	0.513811	0.24	Strong binder
SGWTAGAAAYYVGYL	surface_glycoprotein_S1_254-260	13	HLA-DQA10601-DQB10635	0.513811	0.24	Strong binder
SGWTAGAAAYYVGYL	surface_glycoprotein_S1_254-260	13	HLA-DQA10601-DQB10643	0.513811	0.24	Strong binder
SGWTAGAAAYYVGYL	surface_glycoprotein_S1_254-260	13	HLA-DQA10602-DQB10601	0.513811	0.24	Strong binder
SGWTAGAAAYYVGYL	surface_glycoprotein_S1_254-260	13	HLA-DQA10602-DQB10635	0.513811	0.24	Strong binder
SGWTAGAAAYYVGYL	surface_glycoprotein_S1_254-260	13	HLA-DQA10602-DQB10643	0.513811	0.24	Strong binder
SPRRARSVASQSIIA	surface_glycoprotein_S1-S2_682-689	9	HLA-DPA10103-DPB111901	0.698494	0.25	Strong binder
TNSPRRARSVASQSI	surface_glycoprotein_S1-S2_682-689	7	HLA-DPA10103-DPB113001	0.824642	0.25	Strong binder
TNSPRRARSVASQSI	surface_glycoprotein_S1-S2_682-689	7	HLA-DPA10103-DPB12001	0.824642	0.25	Strong binder
TNSPRRARSVASQSI	surface_glycoprotein_S1-S2_682-689	7	HLA-DPA10103-DPB19101	0.824642	0.25	Strong binder
SPRRARSVASQSIIA	surface_glycoprotein_S1-S2_682-689	9	HLA-DPA10104-DPB111901	0.698494	0.25	Strong binder
TNSPRRARSVASQSI	surface_glycoprotein_S1-S2_682-689	7	HLA-DPA10104-DPB113001	0.824642	0.25	Strong binder
TNSPRRARSVASQSI	surface_glycoprotein_S1-S2_682-689	7	HLA-DPA10104-DPB12001	0.824642	0.25	Strong binder
TNSPRRARSVASQSI	surface_glycoprotein_S1-S2_682-689	7	HLA-DPA10104-DPB19101	0.824642	0.25	Strong binder
SPRRARSVASQSIIA	surface_glycoprotein_S1-S2_682-689	9	HLA-DPA10105-DPB111901	0.698494	0.25	Strong binder
TNSPRRARSVASQSI	surface_glycoprotein_S1-S2_682-689	7	HLA-DPA10105-DPB113001	0.824642	0.25	Strong binder
TNSPRRARSVASQSI	surface_glycoprotein_S1-S2_682-689	7	HLA-DPA10105-DPB12001	0.824642	0.25	Strong binder
TNSPRRARSVASQSI	surface_glycoprotein_S1-S2_682-689	7	HLA-DPA10105-DPB19101	0.824642	0.25	Strong binder
SPRRARSVASQSIIA	surface_glycoprotein_S1-S2_682-689	9	HLA-DPA10107-DPB111901	0.698494	0.25	Strong binder
TNSPRRARSVASQSI	surface_glycoprotein_S1-S2_682-689	7	HLA-DPA10107-DPB113001	0.824642	0.25	Strong binder
TNSPRRARSVASQSI	surface_glycoprotein_S1-S2_682-689	7	HLA-DPA10107-DPB12001	0.824642	0.25	Strong binder
TNSPRRARSVASQSI	surface_glycoprotein_S1-S2_682-689	7	HLA-DPA10107-DPB19101	0.824642	0.25	Strong binder
SPRRARSVASQSIIA	surface_glycoprotein_S1-S2_682-689	9	HLA-DPA10108-DPB111901	0.698494	0.25	Strong binder
TNSPRRARSVASQSI	surface_glycoprotein_S1-S2_682-689	7	HLA-DPA10108-DPB113001	0.824642	0.25	Strong binder
TNSPRRARSVASQSI	surface_glycoprotein_S1-S2_682-689	7	HLA-DPA10108-DPB12001	0.824642	0.25	Strong binder
TNSPRRARSVASQSI	surface_glycoprotein_S1-S2_682-689	7	HLA-DPA10108-DPB19101	0.824642	0.25	Strong binder
SPRRARSVASQSIIA	surface_glycoprotein_S1-S2_682-689	9	HLA-DPA10109-DPB111901	0.698494	0.25	Strong binder
TNSPRRARSVASQSI	surface_glycoprotein_S1-S2_682-689	7	HLA-DPA10109-DPB113001	0.824642	0.25	Strong binder
TNSPRRARSVASQSI	surface_glycoprotein_S1-S2_682-689	7	HLA-DPA10109-DPB12001	0.824642	0.25	Strong binder
TNSPRRARSVASQSI	surface_glycoprotein_S1-S2_682-689	7	HLA-DPA10109-DPB19101	0.824642	0.25	Strong binder
SPRRARSVASQSIIA	surface_glycoprotein_S1-S2_682-689	9	HLA-DPA10110-DPB111901	0.698494	0.25	Strong binder
TNSPRRARSVASQSI	surface_glycoprotein_S1-S2_682-689	7	HLA-DPA10110-DPB113001	0.824642	0.25	Strong binder
TNSPRRARSVASQSI	surface_glycoprotein_S1-S2_682-689	7	HLA-DPA10110-DPB12001	0.824642	0.25	Strong binder
TNSPRRARSVASQSI	surface_glycoprotein_S1-S2_682-689	7	HLA-DPA10110-DPB19101	0.824642	0.25	Strong binder
DDQIGYYRRATRRIR	N_protein_77-87	15	HLA-DPA10202-DPB18301	0.053488	0.25	Strong binder
SPRRARSVASQSIIA	surface_glycoprotein_S1-S2_682-689	9	HLA-DPA10203-DPB111901	0.698494	0.25	Strong binder
TNSPRRARSVASQSI	surface_glycoprotein_S1-S2_682-689	7	HLA-DPA10203-DPB113001	0.824642	0.25	Strong binder
TNSPRRARSVASQSI	surface_glycoprotein_S1-S2_682-689	7	HLA-DPA10203-DPB12001	0.824642	0.25	Strong binder
TNSPRRARSVASQSI	surface_glycoprotein_S1-S2_682-689	7	HLA-DPA10203-DPB19101	0.824642	0.25	Strong binder
DDQIGYYRRATRRIR	N_protein_77-87	15	HLA-DPA10204-DPB18301	0.053488	0.25	Strong binder
NSPRRARSVASQSII	surface_glycoprotein_S1-S2_682-689	8	HLA-DPA10301-DPB10601	0.474309	0.25	Strong binder
TNSPRRARSVASQSI	surface_glycoprotein_S1-S2_682-689	7	HLA-DPA10302-DPB10301	0.666556	0.25	Strong binder
SPRRARSVASQSIIA	surface_glycoprotein_S1-S2_682-689	9	HLA-DPA10302-DPB10301	0.665393	0.25	Strong binder
TNSPRRARSVASQSI	surface_glycoprotein_S1-S2_682-689	7	HLA-DPA10302-DPB110401	0.666556	0.25	Strong binder
SPRRARSVASQSIIA	surface_glycoprotein_S1-S2_682-689	9	HLA-DPA10302-DPB110401	0.665393	0.25	Strong binder
TNSPRRARSVASQSI	surface_glycoprotein_S1-S2_682-689	7	HLA-DPA10302-DPB111101	0.666556	0.25	Strong binder
SPRRARSVASQSIIA	surface_glycoprotein_S1-S2_682-689	9	HLA-DPA10302-DPB111101	0.665393	0.25	Strong binder
TNSPRRARSVASQSI	surface_glycoprotein_S1-S2_682-689	7	HLA-DPA10302-DPB112401	0.666556	0.25	Strong binder
SPRRARSVASQSIIA	surface_glycoprotein_S1-S2_682-689	9	HLA-DPA10302-DPB112401	0.665393	0.25	Strong binder
TNSPRRARSVASQSI	surface_glycoprotein_S1-S2_682-689	7	HLA-DPA10302-DPB12501	0.666556	0.25	Strong binder
SPRRARSVASQSIIA	surface_glycoprotein_S1-S2_682-689	9	HLA-DPA10302-DPB12501	0.665393	0.25	Strong binder
TNSPRRARSVASQSI	surface_glycoprotein_S1-S2_682-689	7	HLA-DPA10302-DPB14501	0.666556	0.25	Strong binder
SPRRARSVASQSIIA	surface_glycoprotein_S1-S2_682-689	9	HLA-DPA10302-DPB14501	0.665393	0.25	Strong binder
TNSPRRARSVASQSI	surface_glycoprotein_S1-S2_682-689	7	HLA-DPA10302-DPB17001	0.666556	0.25	Strong binder
SPRRARSVASQSIIA	surface_glycoprotein_S1-S2_682-689	9	HLA-DPA10302-DPB17001	0.665393	0.25	Strong binder
TNSPRRARSVASQSI	surface_glycoprotein_S1-S2_682-689	7	HLA-DPA10302-DPB17601	0.666556	0.25	Strong binder
SPRRARSVASQSIIA	surface_glycoprotein_S1-S2_682-689	9	HLA-DPA10302-DPB17601	0.665393	0.25	Strong binder
TNSPRRARSVASQSI	surface_glycoprotein_S1-S2_682-689	7	HLA-DPA10302-DPB17801	0.666556	0.25	Strong binder
SPRRARSVASQSIIA	surface_glycoprotein_S1-S2_682-689	9	HLA-DPA10302-DPB17801	0.665393	0.25	Strong binder
TNSPRRARSVASQSI	surface_glycoprotein_S1-S2_682-689	7	HLA-DPA10302-DPB19201	0.666556	0.25	Strong binder
SPRRARSVASQSIIA	surface_glycoprotein_S1-S2_682-689	9	HLA-DPA10302-DPB19201	0.665393	0.25	Strong binder
NSPRRARSVASQSII	surface_glycoprotein_S1-S2_682-689	8	HLA-DPA10302-DPB19801	0.700714	0.25	Strong binder
NSPRRARSVASQSII	surface_glycoprotein_S1-S2_682-689	8	HLA-DPA10303-DPB10601	0.474309	0.25	Strong binder
PANNAAIVLQLPQGT	N_protein_158-164	4	HLA-DQA10101-DQB10602	0.264951	0.25	Strong binder
PANNAAIVLQLPQGT	N_protein_158-164	4	HLA-DQA10101-DQB10616	0.264951	0.25	Strong binder
PANNAAIVLQLPQGT	N_protein_158-164	4	HLA-DQA10101-DQB10619	0.264951	0.25	Strong binder
RNPANNAAIVLQLPQ	N_protein_158-164	2	HLA-DQA10102-DQB10623	0.362784	0.25	Strong binder
PANNAAIVLQLPQGT	N_protein_158-164	4	HLA-DQA10104-DQB10602	0.264951	0.25	Strong binder
PANNAAIVLQLPQGT	N_protein_158-164	4	HLA-DQA10104-DQB10616	0.264951	0.25	Strong binder
PANNAAIVLQLPQGT	N_protein_158-164	4	HLA-DQA10104-DQB10619	0.264951	0.25	Strong binder
PANNAAIVLQLPQGT	N_protein_158-164	4	HLA-DQA10105-DQB10602	0.264951	0.25	Strong binder
PANNAAIVLQLPQGT	N_protein_158-164	4	HLA-DQA10105-DQB10616	0.264951	0.25	Strong binder
PANNAAIVLQLPQGT	N_protein_158-164	4	HLA-DQA10105-DQB10619	0.264951	0.25	Strong binder
RNPANNAAIVLQLPQ	N_protein_158-164	2	HLA-DQA10106-DQB10623	0.362784	0.25	Strong binder
PANNAAIVLQLPQGT	N_protein_158-164	4	HLA-DQA10107-DQB10602	0.264951	0.25	Strong binder
PANNAAIVLQLPQGT	N_protein_158-164	4	HLA-DQA10107-DQB10616	0.264951	0.25	Strong binder
PANNAAIVLQLPQGT	N_protein_158-164	4	HLA-DQA10107-DQB10619	0.264951	0.25	Strong binder
RNPANNAAIVLQLPQ	N_protein_158-164	2	HLA-DQA10108-DQB10623	0.362784	0.25	Strong binder
RNPANNAAIVLQLPQ	N_protein_158-164	2	HLA-DQA10109-DQB10623	0.362784	0.25	Strong binder
SSSGWTAGAAAYYVG	surface_glycoprotein_S1_254-260	11	HLA-DQA10201-DQB10328	0.800856	0.25	Strong binder
SSGWTAGAAAYYVGY	surface_glycoprotein_S1_254-260	12	HLA-DQA10201-DQB10622	0.207391	0.25	Strong binder
SSSGWTAGAAAYYVG	surface_glycoprotein_S1_254-260	11	HLA-DQA10301-DQB10304	0.101615	0.25	Strong binder
SSSGWTAGAAAYYVG	surface_glycoprotein_S1_254-260	11	HLA-DQA10301-DQB10314	0.101615	0.25	Strong binder
SSSGWTAGAAAYYVG	surface_glycoprotein_S1_254-260	11	HLA-DQA10302-DQB10304	0.101615	0.25	Strong binder
SSSGWTAGAAAYYVG	surface_glycoprotein_S1_254-260	11	HLA-DQA10302-DQB10314	0.101615	0.25	Strong binder
SSSGWTAGAAAYYVG	surface_glycoprotein_S1_254-260	11	HLA-DQA10303-DQB10304	0.101615	0.25	Strong binder
SSSGWTAGAAAYYVG	surface_glycoprotein_S1_254-260	11	HLA-DQA10303-DQB10314	0.101615	0.25	Strong binder
SSSGWTAGAAAYYVG	surface_glycoprotein_S1_254-260	11	HLA-DQA10601-DQB10612	0.182797	0.25	Strong binder
SSSGWTAGAAAYYVG	surface_glycoprotein_S1_254-260	11	HLA-DQA10602-DQB10612	0.182797	0.25	Strong binder
TNSPRRARSVASQSI	surface_glycoprotein_S1-S2_682-689	7	HLA-DPA10103-DPB111901	0.695832	0.26	Strong binder
TNSPRRARSVASQSI	surface_glycoprotein_S1-S2_682-689	7	HLA-DPA10104-DPB111901	0.695832	0.26	Strong binder
TNSPRRARSVASQSI	surface_glycoprotein_S1-S2_682-689	7	HLA-DPA10105-DPB111901	0.695832	0.26	Strong binder
TNSPRRARSVASQSI	surface_glycoprotein_S1-S2_682-689	7	HLA-DPA10107-DPB111901	0.695832	0.26	Strong binder
TNSPRRARSVASQSI	surface_glycoprotein_S1-S2_682-689	7	HLA-DPA10108-DPB111901	0.695832	0.26	Strong binder
TNSPRRARSVASQSI	surface_glycoprotein_S1-S2_682-689	7	HLA-DPA10109-DPB111901	0.695832	0.26	Strong binder
TNSPRRARSVASQSI	surface_glycoprotein_S1-S2_682-689	7	HLA-DPA10110-DPB111901	0.695832	0.26	Strong binder
TNSPRRARSVASQSI	surface_glycoprotein_S1-S2_682-689	7	HLA-DPA10203-DPB111901	0.695832	0.26	Strong binder
NSPRRARSVASQSII	surface_glycoprotein_S1-S2_682-689	8	HLA-DPA10301-DPB10901	0.434006	0.26	Strong binder
NSPRRARSVASQSII	surface_glycoprotein_S1-S2_682-689	8	HLA-DPA10302-DPB111901	0.56331	0.26	Strong binder
SPRRARSVASQSIIA	surface_glycoprotein_S1-S2_682-689	9	HLA-DPA10302-DPB113201	0.638625	0.26	Strong binder
SPRRARSVASQSIIA	surface_glycoprotein_S1-S2_682-689	9	HLA-DPA10302-DPB13501	0.638625	0.26	Strong binder
SPRRARSVASQSIIA	surface_glycoprotein_S1-S2_682-689	9	HLA-DPA10302-DPB17901	0.638625	0.26	Strong binder
NSPRRARSVASQSII	surface_glycoprotein_S1-S2_682-689	8	HLA-DPA10303-DPB10901	0.434006	0.26	Strong binder
NSPRRARSVASQSII	surface_glycoprotein_S1-S2_682-689	8	HLA-DPA10401-DPB16901	0.6879	0.26	Strong binder
PANNAAIVLQLPQGT	N_protein_158-164	4	HLA-DQA10101-DQB10629	0.110479	0.26	Strong binder
PANNAAIVLQLPQGT	N_protein_158-164	4	HLA-DQA10104-DQB10629	0.110479	0.26	Strong binder
PANNAAIVLQLPQGT	N_protein_158-164	4	HLA-DQA10105-DQB10629	0.110479	0.26	Strong binder
PANNAAIVLQLPQGT	N_protein_158-164	4	HLA-DQA10107-DQB10629	0.110479	0.26	Strong binder
SSSGWTAGAAAYYVG	surface_glycoprotein_S1_254-260	11	HLA-DQA10201-DQB10301	0.784789	0.26	Strong binder
SGWTAGAAAYYVGYL	surface_glycoprotein_S1_254-260	13	HLA-DQA10201-DQB10304	0.529344	0.26	Strong binder
SSSGWTAGAAAYYVG	surface_glycoprotein_S1_254-260	11	HLA-DQA10201-DQB10309	0.784789	0.26	Strong binder
SSSGWTAGAAAYYVG	surface_glycoprotein_S1_254-260	11	HLA-DQA10201-DQB10310	0.784789	0.26	Strong binder
SGWTAGAAAYYVGYL	surface_glycoprotein_S1_254-260	13	HLA-DQA10201-DQB10314	0.529344	0.26	Strong binder
SSSGWTAGAAAYYVG	surface_glycoprotein_S1_254-260	11	HLA-DQA10201-DQB10316	0.784789	0.26	Strong binder
SSSGWTAGAAAYYVG	surface_glycoprotein_S1_254-260	11	HLA-DQA10201-DQB10319	0.784789	0.26	Strong binder
SSSGWTAGAAAYYVG	surface_glycoprotein_S1_254-260	11	HLA-DQA10201-DQB10321	0.784789	0.26	Strong binder
SSSGWTAGAAAYYVG	surface_glycoprotein_S1_254-260	11	HLA-DQA10201-DQB10322	0.784789	0.26	Strong binder
SSSGWTAGAAAYYVG	surface_glycoprotein_S1_254-260	11	HLA-DQA10201-DQB10324	0.784789	0.26	Strong binder
SSSGWTAGAAAYYVG	surface_glycoprotein_S1_254-260	11	HLA-DQA10201-DQB10327	0.784789	0.26	Strong binder
SSSGWTAGAAAYYVG	surface_glycoprotein_S1_254-260	11	HLA-DQA10201-DQB10329	0.784789	0.26	Strong binder
SSSGWTAGAAAYYVG	surface_glycoprotein_S1_254-260	11	HLA-DQA10201-DQB10335	0.784789	0.26	Strong binder
SSSGWTAGAAAYYVG	surface_glycoprotein_S1_254-260	11	HLA-DQA10201-DQB10336	0.784789	0.26	Strong binder
SSGWTAGAAAYYVGY	surface_glycoprotein_S1_254-260	12	HLA-DQA10401-DQB10312	0.252391	0.26	Strong binder
SSGWTAGAAAYYVGY	surface_glycoprotein_S1_254-260	12	HLA-DQA10401-DQB10330	0.182336	0.26	Strong binder
SGWTAGAAAYYVGYL	surface_glycoprotein_S1_254-260	13	HLA-DQA10401-DQB10601	0.489609	0.26	Strong binder
[truncated: 53,709 more rows]

## Sheet: target (MS identified) proteins
start	end	sequence	lenseq	name
78	82	SPDD	4	sp|P06733|ENOA_HUMAN
163	167	GTTL	4	sp|P68104|EF1A1_HUMAN
90	94	TRRI	4	sp|P05783|K1C18_HUMAN
153	157	NAAI	4	sp|P68363|TBA1B_HUMAN
154	158	AAIV	4	sp|P68104|EF1A1_HUMAN
156	160	IVLQ	4	sp|P05783|K1C18_HUMAN
690	694	SIIA	4	sp|P05787|K2C8_HUMAN
